# Supplementary material for: Hypervalent iodine-triggered transformation of homopropargyl sulfonamides into dihalo-2,3-dihydropyrroles
Source: Royal Society of Chemistry journal article supplement (doi:10.1039/c6ob02536f), 2016-12-20
Supplement: c6ob02536f1.pdf [file c6ob02536f1.pdf]

**Supporting Information**  
**for**  
**Hypervalent Iodine-Triggered Transformation of**  
**Homopropargyl Sulfonamides into Dihalo-2,3-**  
**Dihydropyrroles**

Ruijia Wang<sup>†</sup>, Yuejun OuYang<sup>‡</sup>, Chonghui Xu<sup>†</sup>, Niannian Yi<sup>†</sup>, Jun Jiang<sup>†</sup>, Wei Deng<sup>\*†</sup>,  
Zebing Zeng<sup>†</sup> and Jiannan Xiang<sup>\*†</sup>

<sup>†</sup> State Key Laboratory of Chemo/Biosensing and Chemometrics, College of Chemistry and  
Chemical Engineering, Hunan University, Changsha, 410082, P. R. China

<sup>‡</sup>Huaihua Key Laboratory of Functional Inorganic & Polymaterial Materials(Huaihua Univers  
ity), Huaihua 418000, P. R. China

jnxiang@hnu.edu.cn; weideng@hnu.edu.cn

---

| <b>Table of Contents</b>                       | <b>Page No.</b> |
|------------------------------------------------|-----------------|
| General information                            | S2              |
| Experimental Section                           | S2              |
| Spectral Data                                  | S3 – S19        |
| <sup>1</sup> H and <sup>13</sup> C NMR Spectra | S20 – S60       |
| Crystallographic spectrum of <b>2j</b>         | S61- S71        |

## 1. General information

All product mixtures were analyzed by thin layer chromatography glass-backed silica TLC plates with a fluorescent indicator from Branch of Qingdao Haiyang Chemical CO. LTD. For flash column chromatography, silica gel (200-300 mesh) was used as stationary phase.  $^1\text{H}$  and  $^{13}\text{C}$  NMR spectra were recorded on a Varian INOVA-400 in deuterated chloroform at 25 °C with residue solvent peaks as internal standards. Chemical shifts ( $\delta$ ) are reported in ppm, and spin-spin coupling constants ( $J$ ) are given in Hz, while multiplicities are abbreviated by s (singlet), d (doublet), t (triplet), dd (doublet, doublet), and m (multiplet). High resolution mass spectra (HRMS) were obtained using GCT-TOF instrument with the EI/ESI technique. Melting points were recorded on a national standard melting point apparatus (Model: Taikex XT-4) and were uncorrected.

All other reagents were purchased from commercial companies and used without further purification.

## 2. Experimental Section

### General procedure of Mono/Dihalo-2,3-Dihydropyrroles

- A.** CuI (0.7 mmol), DBU (0.7 mmol), PhCl (2 ml) and  $\text{K}_2\text{CO}_3$  (0.2 mmol) were sequentially added to a round-bottom flask (10 ml) and stirred at room temperature for 5 min. Then, PIFA (0.2 mmol) and homopropargyl sulfonamide derivatives **1** (0.2 mmol) were separately dissolved in PhCl (1.0 ml) for sequential addition to the system at room temperature. The reaction mixture was heated with stirring at 100°C for 5 min. Upon completion, the mixture was cooled to room temperature and quenched with an aqueous solution of saturated  $\text{Na}_2\text{S}_2\text{O}_3$  (5 ml). After extraction with  $\text{CH}_2\text{Cl}_2$  (3  $\times$  15 ml), the organic phases were combined and dried over anhydrous  $\text{Na}_2\text{SO}_4$ . The solvent was removed, and the residual crude product was purified by flash column chromatography with a mixture of n-hexane and ethyl acetate to give the desired product in the noted yields.
- B.**  $\text{CuBr}_2/\text{CuCl}_2$  (0.6 mmol), DBU (0.6 mmol), PhCl (2 ml) and  $\text{K}_2\text{CO}_3$  (0.2 mmol) were sequentially added to a round-bottom flask (10 ml) and stirred at room temperature for 5 min. Then, DIB (0.4 mmol) and homopropargyl sulfonamide derivatives **1** (0.2 mmol) were separately dissolved in PhCl (1.0 ml) for sequential addition to the system at room temperature. The reaction mixture was heated with stirring at 110°C for 10 min. Upon completion, the mixture was cooled to room temperature and quenched with an aqueous solution of saturated  $\text{NaHCO}_3$  (5 ml). After extraction with  $\text{CH}_2\text{Cl}_2$  (3  $\times$  15 ml), the organic phases were combined and dried over anhydrous  $\text{Na}_2\text{SO}_4$ . The solvent was removed, and the residual crude product was purified by flash column chromatography with a mixture of n-hexane and ethyl acetate to give the desired product in the noted yields.

### 3. Spectral data

4,5-diiodo-2-phenyl-1-tosyl-2,3-dihydro-1H-pyrrole(**2a**)

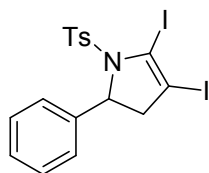

Follow the general procedure A, **2a** was obtained 96.9 mg (88%) as white solid with *n*-hexane/ethyl acetate (10/1) used as eluent.s

Melting point: 150 °C.

<sup>1</sup>H NMR (400 MHz, CDCl<sub>3</sub>) δ 7.74 (d, *J* = 8.0 Hz, 2H), 7.36 ~ 7.28 (m, 7H), 5.39 (d, *J* = 8.0 Hz, 1H), 2.90 ~ 2.83 (dd, *J*<sub>1</sub> = 16.0 Hz, *J*<sub>2</sub> = 8.0 Hz, 1H), 2.49 ~ 2.45 (m, 1H), 2.45 (s, 3H).

<sup>13</sup>C NMR (101 MHz, CDCl<sub>3</sub>) δ 144.6, 141.2, 134.1, 129.8, 128.8, 128.0, 127.9, 125.7, 98.1, 95.8, 65.7, 48.6, 21.7.

HRMS (EI): [C<sub>17</sub>H<sub>15</sub>I<sub>2</sub>NO<sub>2</sub>S] calcd. For 550.8907; found 550.8888.

4,5-diiodo-2-(*p*-tolyl)-1-tosyl-2,3-dihydro-1H-pyrrole(**2b**)

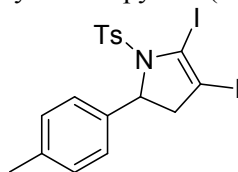

Follow the general procedure A, **2b** was obtained 90.3 mg (80%) as white solid with *n*-hexane/ethyl acetate (10/1) used as eluent.

Melting point: 130 °C.

<sup>1</sup>H NMR (400 MHz, CDCl<sub>3</sub>) δ 7.74 (d, *J* = 8.0 Hz, 2H), 7.33 (d, *J* = 8.0 Hz, 2H), 7.19 ~ 7.15 (m, 4H), 5.35 (d, *J* = 8.0 Hz, 1H), 2.87 ~ 2.80 (dd, *J*<sub>1</sub> = 16.0 Hz, *J*<sub>2</sub> = 8.0 Hz, 1H), 2.48 ~ 2.44 (m, 1H), 2.46 (s, 3H), 2.34 (s, 3H).

<sup>13</sup>C NMR (101 MHz, CDCl<sub>3</sub>) δ 144.5, 138.3, 137.8, 134.2, 129.8, 129.5, 127.9, 125.7, 98.1, 95.9, 65.6, 48.6, 21.7, 21.1.

HRMS (EI): [C<sub>18</sub>H<sub>17</sub>I<sub>2</sub>NO<sub>2</sub>S] calcd. For 564.9064; found 564.9063.

4,5-diiodo-2-(4-methoxyphenyl)-1-tosyl-2,3-dihydro-1H-pyrrole(**2c**):

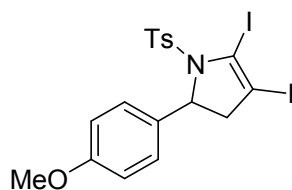

Follow the general procedure A, **2c** was obtained 98.7 mg (85%) as white viscous oil with *n*-hexane/ethyl acetate (10/1) used as eluent.

<sup>1</sup>H NMR (400 MHz, CDCl<sub>3</sub>) δ 7.73 (d, *J* = 8.0 Hz, 2H), 7.32 (d, *J* = 8.0 Hz, 2H), 7.21 (d, *J* = 8.0 Hz, 2H), 6.88 (d, *J* = 8.0 Hz, 2H), 5.34 (d, *J* = 8.0 Hz, 1H), 3.80 (s, 3H), 2.86 ~ 2.80 (dd, *J*<sub>1</sub> = 16.0 Hz, *J*<sub>2</sub> = 8.0 Hz, 1H), 2.48 ~ 2.44 (m, 1H), 2.45 (s, 3H).

<sup>13</sup>C NMR (101 MHz, CDCl<sub>3</sub>) δ 159.4, 144.5, 134.3, 133.4, 129.8, 127.9, 127.1, 114.2, 98.0, 95.8, 65.4, 55.3, 48.5, 21.7.

HRMS (EI): [C<sub>18</sub>H<sub>17</sub>I<sub>2</sub>NO<sub>3</sub>S] calcd. For 580.9013; found 580.9003.

2-(4-fluorophenyl)-4,5-diiodo-1-tosyl-2,3-dihydro-1H-pyrrole(**2d**):

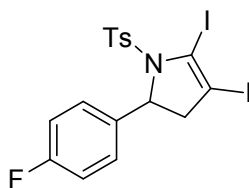

Follow the general procedure A, **2d** was obtained 83.0 mg (73%) as white solid with *n*-hexane/ethyl acetate (10/1) used as eluent.

Melting point: 136-138°C.

<sup>1</sup>H NMR (400 MHz, CDCl<sub>3</sub>) δ 7.73 (d, *J* = 8.0 Hz, 2H), 7.33 (d, *J* = 8.0 Hz, 2H), 7.26 (t, *J* = 4.0 Hz, 2H), 7.04 (t, *J* = 8.0 Hz, 2H), 5.36 (d, *J* = 8.0 Hz, 1H), 2.89 ~ 2.82 (dd, *J*<sub>1</sub> = 16.0 Hz, *J*<sub>2</sub> = 8.0 Hz, 1H), 2.46 (s, 3H), 2.46 ~ 2.41 (m, 1H).

<sup>13</sup>C NMR (101 MHz, CDCl<sub>3</sub>) δ 163.6, 161.1, 144.7, 137.1, 134.0, 129.8, 127.9, 127.6, 115.8, 98.0, 95.5, 65.0, 48.6, 21.7.

HRMS (EI): [C<sub>17</sub>H<sub>14</sub>FI<sub>2</sub>NO<sub>2</sub>S] calcd. For 568.8813; found 568.8828.

2-(4-chlorophenyl)-4,5-diiodo-1-tosyl-2,3-dihydro-1H-pyrrole(**2e**):

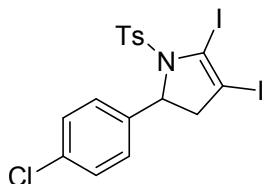

Follow the general procedure A, **2e** was obtained 81.8 mg (70%) as white solid with *n*-hexane/ethyl acetate (10/1) used as eluent.

Melting point: 154-156°C.

$^1\text{H}$  NMR (400 MHz,  $\text{CDCl}_3$ )  $\delta$  7.73 (d,  $J = 8.0$  Hz, 2H), 7.35-7.32 (m, 4H), 7.23 (d,  $J = 8.0$  Hz, 2H), 5.35 (d,  $J = 8.0$  Hz, 1H), 2.89 ~ 2.83 (dd,  $J_1 = 16.0$  Hz,  $J_2 = 8.0$  Hz, 1H), 2.46 (s, 3H), 2.42 (d,  $J = 8.0$  Hz, 1H).

$^{13}\text{C}$  NMR (101 MHz,  $\text{CDCl}_3$ )  $\delta$  144.7, 139.7, 134.0, 133.9, 129.9, 129.0, 127.9, 127.2, 98.0, 95.4, 65.1, 48.5, 21.7.

HRMS (EI):  $[\text{C}_{17}\text{H}_{14}\text{ClI}_2\text{NO}_2\text{S}]$  calcd. For 584.8518; found 584.8516.

2-(4-bromophenyl)-4,5-diiodo-1-tosyl-2,3-dihydro-1H-pyrrole(**2f**):

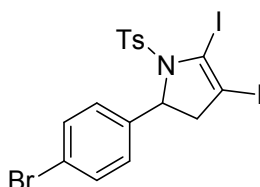

Follow the general procedure A, **2f** was obtained 94.3 mg (75%) as white solid with *n*-hexane/ethyl acetate (10/1) used as eluent.

Melting point: 162-164 °C.

$^1\text{H}$  NMR (400 MHz,  $\text{CDCl}_3$ )  $\delta$  7.73 (d,  $J = 8.0$  Hz, 2H), 7.48 (d,  $J = 8.0$  Hz, 2H), 7.34 (d,  $J = 8.0$  Hz, 2H), 7.17 (d,  $J = 8.0$  Hz, 2H), 5.33 (d,  $J = 8.0$  Hz, 1H), 2.89 ~ 2.83 (dd,  $J_1 = 16.0$  Hz,  $J_2 = 8.0$  Hz, 1H), 2.46 (s, 3H), 2.41 (d,  $J = 8.0$  Hz, 1H).

$^{13}\text{C}$  NMR (101 MHz,  $\text{CDCl}_3$ )  $\delta$  144.8, 140.2, 134.0, 132.0, 129.9, 127.9, 127.5, 122.0, 98.0, 65.1, 48.5, 21.7.

HRMS (EI):  $[\text{C}_{17}\text{H}_{14}^{81}\text{BrI}_2\text{NO}_2\text{S}]$  calcd. For 630.7992; found 630.8013.

4,5-diiodo-1-tosyl-2-(4-(trifluoromethyl)phenyl)-2,3-dihydro-1H-pyrrole(**2g**):

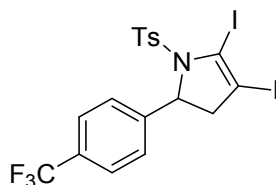

Follow the general procedure A, **2g** was obtained 111.3 mg (90%) as white solid with *n*-hexane/ethyl acetate (10/1) used as eluent.

Melting point: 135°C.

$^1\text{H}$  NMR (400 MHz,  $\text{CDCl}_3$ )  $\delta$  7.75 (d,  $J = 8.0$  Hz, 2H), 7.62 (d,  $J = 8.0$  Hz, 2H), 7.42 (d,  $J = 8.0$  Hz, 2H), 7.34 (d,  $J = 8.0$  Hz, 2H), 5.43 (d,  $J = 12.0$  Hz, 1H), 2.94 ~ 2.87 (dd,  $J_1 = 16.0$  Hz,  $J_2 = 8.0$  Hz, 1H), 2.46 (s, 3H), 2.46 ~ 2.41 (m, 1H).

$^{13}\text{C}$  NMR (101 MHz,  $\text{CDCl}_3$ )  $\delta$  145.1, 144.9, 133.8, 130.4, 129.9, 127.9, 126.1, 125.9, 125.2, 122.5, 98.0, 95.3, 65.1, 48.6, 21.7.

HRMS (EI):  $[\text{C}_{18}\text{H}_{14}\text{F}_3\text{I}_2\text{NO}_2\text{S}]$  calcd. For 618.8781; found 618.8780.

4,5-diiodo-2-(*o*-tolyl)-1-tosyl-2,3-dihydro-1H-pyrrole(**2h**):

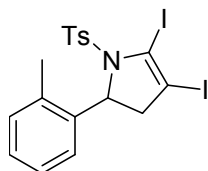

Follow the general procedure A, **2h** was obtained 87.0 mg (77%) as white solid with *n*-hexane/ethyl acetate (10/1) used as eluent.

Melting point: 174-176°C.

$^1\text{H}$  NMR (400 MHz,  $\text{CDCl}_3$ )  $\delta$  7.75 (d,  $J = 8.0$  Hz, 2H), 7.34 (d,  $J = 8.0$  Hz, 2H), 7.26 (s, 1H), 7.22 – 7.17 (m, 3H), 5.55 (d,  $J = 8.0$  Hz, 1H), 3.00 ~ 2.94 (dd,  $J_1 = 16.0$  Hz,  $J_2 = 8.0$  Hz, 1H), 2.46 (s, 3H), 2.29 (s, 3H), 2.29 ~ 2.24 (m, 1H).

$^{13}\text{C}$  NMR (101 MHz,  $\text{CDCl}_3$ )  $\delta$  144.5, 139.6, 134.1, 133.2, 130.7, 129.8, 128.0, 127.8, 126.6, 125.5, 98.3, 95.3, 63.2, 48.7, 21.7, 19.2.

HRMS (EI):  $[\text{C}_{18}\text{H}_{17}\text{I}_2\text{NO}_2\text{S}]$  calcd. For 564.9064; found 564.9051.

2-(2-bromophenyl)-4,5-diiodo-1-tosyl-2,3-dihydro-1H-pyrrole(**2i**):

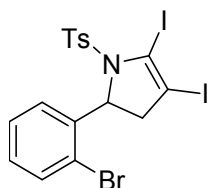

Follow the general procedure A, **2i** was obtained 94.3 mg (75%) as white solid with *n*-hexane/ethyl acetate (25/1) used as eluent.

Melting point: 202-204°C.

$^1\text{H}$  NMR (400 MHz,  $\text{CDCl}_3$ )  $\delta$  7.80 (d,  $J = 8.0$  Hz, 2H), 7.55 (d,  $J = 8.0$  Hz, 1H), 7.42 – 7.35 (m, 4H), 7.17 (t,  $J = 4.0$  Hz, 1H), 5.62 (d,  $J = 12.0$  Hz, 1H), 2.98 ~ 2.92 (dd,  $J_1 = 16.0$  Hz,  $J_2 = 8.0$  Hz, 1H), 2.47 (s, 3H), 2.26 (d,  $J = 20.0$  Hz, 1H).

$^{13}\text{C}$  NMR (101 MHz,  $\text{CDCl}_3$ )  $\delta$  144.8, 140.2, 133.5, 132.9, 129.9, 129.3, 128.05, 128.02, 127.6, 120.8, 98.2, 96.1, 65.4, 48.8, 21.7.

HRMS (EI): [C<sub>17</sub>H<sub>14</sub><sup>81</sup>BrI<sub>2</sub>NO<sub>2</sub>S] calcd. For 630.7992; found 630.7972.

2-(tert-butyl)-4,5-diiodo-1-tosyl-2,3-dihydro-1H-pyrrole(**2j**):

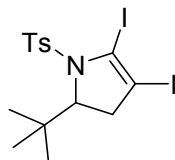

Follow the general procedure A, **2j** was obtained 100.8 mg (95%) as white viscous oil with *n*-hexane/ethyl acetate (10/1) used as eluent.

<sup>1</sup>H NMR (400 MHz, CDCl<sub>3</sub>) δ 7.77 (d, *J* = 8.0 Hz, 2H), 7.29 (d, *J* = 8.0 Hz, 2H), 4.87 (d, *J* = 8.0 Hz, 1H), 2.42 (s, 3H), 2.30 ~ 2.14 (m, 2H), 0.90 (s, 9H).

<sup>13</sup>C NMR (101 MHz, CDCl<sub>3</sub>) δ 143.3, 138.1, 129.6, 127.0, 65.9, 60.6, 59.6, 35.3, 26.7, 21.5, 21.0.

HRMS (EI): [C<sub>15</sub>H<sub>19</sub>I<sub>2</sub>NO<sub>2</sub>S] calcd. For 530.9220; found 530.9216.

2-cyclohexyl-4,5-diiodo-1-tosyl-2,3-dihydro-1H-pyrrole(**2k**):

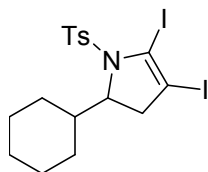

Follow the general procedure A, **2k** was obtained 109.1 mg (98%) as white solid with *n*-hexane/ethyl acetate (10/1) used as eluent.

Melting point: 172-174°C.

<sup>1</sup>H NMR (400 MHz, CDCl<sub>3</sub>) δ 7.69 (d, *J* = 8.0 Hz, 2H), 7.31 (d, *J* = 8.0 Hz, 2H), 4.10 ~ 4.07 (m, 1H), 2.44 (s, 3H), 2.20 ~ 2.16 (m, 1H), 2.09 ~ 2.05 (m, 1H), 1.76 (d, *J* = 12.0 Hz, 2H), 1.64 (t, *J* = 16.0 Hz, 3H), 1.44 (d, *J* = 12.0 Hz, 1H), 1.23 ~ 0.93 (m, 5H).

<sup>13</sup>C NMR (101 MHz, CDCl<sub>3</sub>) δ 144.4, 133.7, 129.7, 127.8, 99.4, 68.9, 43.2, 42.9, 27.6, 27.5, 26.2, 25.99, 25.92, 21.7.

HRMS (EI): [C<sub>17</sub>H<sub>21</sub>I<sub>2</sub>NO<sub>2</sub>S] calcd. For 556.9377; found 556.9368.

2-(furan-2-yl)-4,5-diiodo-1-tosyl-2,3-dihydro-1H-pyrrole(**2l**):

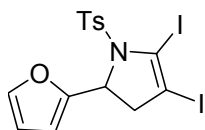

Follow the general procedure A, **2l** was obtained 102.7 mg (95%) as white viscous oil with *n*-hexane/ethyl acetate (10/1) used as eluent.

$^1\text{H}$  NMR (400 MHz,  $\text{CDCl}_3$ )  $\delta$  7.72 (d,  $J = 8.0$  Hz, 2H), 7.37 (s, 1H), 7.33 (d,  $J = 8.0$  Hz, 2H), 6.35 (d,  $J = 8.0$  Hz, 2H), 5.45 (d,  $J = 8.0$  Hz, 1H), 2.68 ~ 2.65 (m, 2H), 2.45 (s, 3H).

$^{13}\text{C}$  NMR (101 MHz,  $\text{CDCl}_3$ )  $\delta$  152.4, 144.7, 142.8, 134.1, 129.8, 127.9, 110.5, 107.7, 97.5, 95.9, 59.7, 45.0, 21.7.

HRMS (EI):  $[\text{C}_{15}\text{H}_{13}\text{I}_2\text{NO}_3\text{S}]$  calcd. For 540.8700; found 540.8689.

2-(3-(benzyloxy)propyl)-4,5-diiodo-1-tosyl-2,3-dihydro-1H-pyrrole(**2m**):

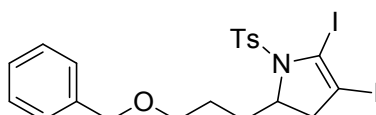

Follow the general procedure C, **2m** was obtained 115.8 mg (93%) as white solid with *n*-hexane/ethyl acetate (10/1) used as eluent.

Melting point: 70°C.

$^1\text{H}$  NMR (400 MHz,  $\text{CDCl}_3$ )  $\delta$  7.68 (d,  $J = 8.0$  Hz, 2H), 7.34 (s, 4H), 7.29 (d,  $J = 8.0$  Hz, 3H), 4.50 (s, 2H), 4.31 ~ 4.27 (m, 1H), 3.54 ~ 3.49 (m, 2H), 2.43 (s, 3H), 2.31 ~ 2.25 (dd,  $J_1 = 16.0$  Hz,  $J_2 = 8.0$  Hz, 1H), 1.99 (d,  $J = 16.0$  Hz, 1H), 1.75 ~ 1.64 (m, 4H).

$^{13}\text{C}$  NMR (101 MHz,  $\text{CDCl}_3$ )  $\delta$  144.4, 138.4, 133.7, 129.7, 128.3, 127.8, 127.6, 127.5, 98.4, 98.3, 72.8, 69.7, 63.9, 45.8, 32.9, 24.9, 21.6.

HRMS (ESI):  $[\text{C}_{21}\text{H}_{23}\text{I}_2\text{NO}_3\text{S}+\text{H}]^+$  calcd. For 623.9482; found 623.9372.

2-(furan-2-yl)-4-iodo-5-phenyl-1-tosyl-2,3-dihydro-1H-pyrrole(**2n**):

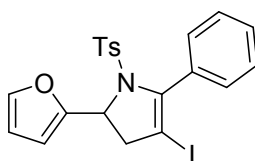

Follow the general procedure A, **2n** was obtained 93.2 mg (95%) as white viscous oil with *n*-hexane/ethyl acetate (10/1) used as eluent.

$^1\text{H}$  NMR (400 MHz,  $\text{CDCl}_3$ )  $\delta$  7.36 (t,  $J = 8.0$  Hz, 4H), 7.26 (s, 1H), 7.21 (d,  $J = 4.0$  Hz, 3H), 7.12 (d,  $J = 8.0$  Hz, 2H), 6.30 (s, 1H), 6.23 (s, 1H), 5.27 (d,  $J = 8.0$  Hz, 1H), 2.72 ~ 2.60 (m, 2H), 2.30 (s, 3H).

$^{13}\text{C}$  NMR (101 MHz,  $\text{CDCl}_3$ )  $\delta$  153.6, 144.2, 143.2, 142.6, 134.5, 132.2, 129.69, 129.62, 129.1, 127.7, 110.5, 106.8, 78.1, 59.0, 45.2, 21.6.

HRMS (EI):  $[\text{C}_{21}\text{H}_{18}\text{INO}_3\text{S}]$  calcd. For 491.0046; found 491.0038.



4,5-dichloro-2-phenyl-1-tosyl-2,3-dihydro-1H-pyrrole(**3a**):

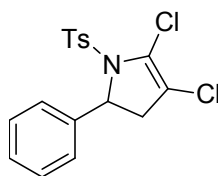

Follow the general procedure B, **3a** was obtained 40.3 mg (55%) as white viscous oil with *n*-hexane/ethyl acetate (10/1) used as eluent.

$^1\text{H}$  NMR (400 MHz,  $\text{CDCl}_3$ )  $\delta$  7.74 (d,  $J = 8.0$  Hz, 2H), 7.38 ~ 7.32 (m, 7H), 5.30 (d,  $J = 8.0$  Hz, 1H), 2.95 ~ 2.88 (dd,  $J_1 = 20.0$  Hz,  $J_2 = 12.0$  Hz, 1H), 2.47 (s, 3H), 2.47 ~ 2.41 (m, 1H).

$^{13}\text{C}$  NMR (101 MHz,  $\text{CDCl}_3$ )  $\delta$  144.8, 141.1, 133.8, 129.9, 128.9, 128.2, 127.8, 126.0, 125.7, 117.5, 63.0, 40.9, 21.7.

HRMS (EI):  $[\text{C}_{17}\text{H}_{15}\text{Cl}_2\text{NO}_2\text{S}]$  calcd. For 367.0195; found 367.0181.

4,5-dichloro-2-(*p*-tolyl)-1-tosyl-2,3-dihydro-1H-pyrrole(**3b**)

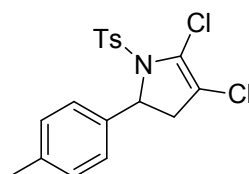

Follow the general procedure B, **3b** was obtained 41.9 mg (55%) as white viscous oil with *n*-hexane/ethyl acetate (10/1) used as eluent.

$^1\text{H}$  NMR (400 MHz,  $\text{CDCl}_3$ )  $\delta$  7.74 (d,  $J = 8.0$  Hz, 2H), 7.35 (d,  $J = 8.0$  Hz, 2H), 7.24 (d,  $J = 8.0$  Hz, 2H), 7.18 (d,  $J = 8.0$  Hz, 2H), 5.25 (d,  $J = 8.0$  Hz, 1H), 2.92 ~ 2.86 (dd,  $J_1 = 16.0$  Hz,  $J_2 = 8.0$  Hz, 1H), 2.46 (s, 3H), 2.43 ~ 2.39 (m, 1H), 2.35 (s, 3H).

$^{13}\text{C}$  NMR (101 MHz,  $\text{CDCl}_3$ )  $\delta$  144.7, 138.2, 138.0, 133.9, 129.9, 129.5, 127.9, 125.9, 125.7, 117.5, 63.0, 40.9, 21.7, 21.1.

HRMS (EI):  $[\text{C}_{18}\text{H}_{17}\text{Cl}_2\text{NO}_2\text{S}]$  calcd. For 381.0352; found 381.0342.

4,5-dichloro-2-(4-methoxyphenyl)-1-tosyl-2,3-dihydro-1H-pyrrole(**3c**):

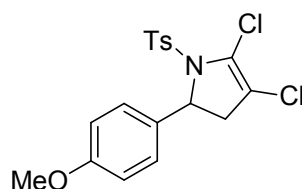

Follow the general procedure B, **3c** was obtained 48.4 mg (61%) as white viscous oil with *n*-hexane/ethyl acetate (10/1) used as eluent.

$^1\text{H}$  NMR (400 MHz,  $\text{CDCl}_3$ )  $\delta$  7.73 (d,  $J = 8.0$  Hz, 2H), 7.34 (d,  $J = 8.0$  Hz, 2H), 7.27 (d,  $J = 8.0$  Hz, 2H), 6.90 (d,  $J = 8.0$  Hz, 2H), 5.24 (d,  $J = 8.0$  Hz, 1H), 3.81 (s, 3H), 2.91 ~ 2.84 (dd,  $J_1 = 16.0$  Hz,  $J_2 = 12.0$  Hz, 1H), 2.46 (s, 3H), 2.44 ~ 2.40 (m, 1H).

$^{13}\text{C}$  NMR (101 MHz,  $\text{CDCl}_3$ )  $\delta$  159.4, 144.7, 133.9, 133.3, 129.9, 127.8, 127.1, 125.8, 117.5, 114.2, 62.8, 55.3, 40.8, 21.7.

HRMS (EI):  $[\text{C}_{18}\text{H}_{17}\text{Cl}_2\text{NO}_3\text{S}]$  calcd. For 397.0301; found 397.0293.

4,5-dichloro-2-(4-fluorophenyl)-1-tosyl-2,3-dihydro-1H-pyrrole(**3d**)

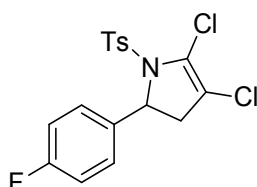

Follow the general procedure B, **3d** was obtained 50.0 mg (65%) as white solid with *n*-hexane/ethyl acetate (10/1) used as eluent.

Melting point: 126°C.

$^1\text{H}$  NMR (400 MHz,  $\text{CDCl}_3$ )  $\delta$  7.73 (d,  $J = 8.0$  Hz, 2H), 7.37 – 7.31 (m, 4H), 7.06 (t,  $J = 8.0$  Hz, 2H), 5.26 (d,  $J = 8.0$  Hz, 1H), 2.95 ~ 2.88 (dd,  $J_1 = 16.0$  Hz,  $J_2 = 12.0$  Hz, 1H), 2.47 (s, 3H), 2.40 (d,  $J = 16.0$  Hz, 1H).

$^{13}\text{C}$  NMR (101 MHz,  $\text{CDCl}_3$ )  $\delta$  161.2, 144.9, 137.0, 133.8, 130.0, 127.8, 127.7, 125.9, 117.2, 115.9, 62.4, 40.9, 21.7.

HRMS (EI):  $[\text{C}_{17}\text{H}_{14}\text{Cl}_2\text{FNO}_2\text{S}]$  calcd. For 385.0101; found 385.0099.

4,5-dichloro-2-(4-chlorophenyl)-1-tosyl-2,3-dihydro-1H-pyrrole(**3e**):

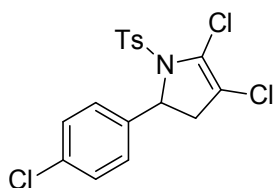

Follow the general procedure B, **3e** was obtained 50.5 mg (63%) as white viscous oil with *n*-hexane/ethyl acetate (10/1) used as eluent.

$^1\text{H}$  NMR (400 MHz,  $\text{CDCl}_3$ )  $\delta$  7.73 (d,  $J = 8.0$  Hz, 2H), 7.35 (d,  $J = 8.0$  Hz, 4H), 7.29 (d,  $J = 8.0$  Hz, 2H), 5.25 (d,  $J = 8.0$  Hz, 1H), 2.95 ~ 2.89 (dd,  $J_1 = 16.0$  Hz,  $J_2 = 8.0$  Hz, 1H), 2.47 (s, 3H), 2.38 (d,  $J = 16.0$  Hz, 1H).

$^{13}\text{C}$  NMR (101 MHz,  $\text{CDCl}_3$ )  $\delta$  145.0, 139.7, 134.1, 133.7, 130.0, 129.1, 127.9, 127.2, 126.0, 117.2, 62.4, 40.9, 21.7.

HRMS (EI):  $[\text{C}_{17}\text{H}_{14}\text{Cl}_3\text{NO}_2\text{S}]$  calcd. For 400.9805; found 400.9797.

2-(4-bromophenyl)-4,5-dichloro-1-tosyl-2,3-dihydro-1H-pyrrole(**3f**)

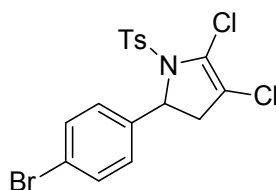

Follow the general procedure B, **3f** was obtained 51.6 mg (58%) as white viscous oil with *n*-hexane/ethyl acetate (10/1) used as eluent.

<sup>1</sup>H NMR (400 MHz, CDCl<sub>3</sub>) δ 7.73 (d, *J* = 8.0 Hz, 2H), 7.50 (d, *J* = 8.0 Hz, 2H), 7.36 (d, *J* = 8.0 Hz, 2H), 7.23 (d, *J* = 8.0 Hz, 2H), 5.24 (d, *J* = 8.0 Hz, 1H), 2.95 ~ 2.89 (dd, *J*<sub>1</sub> = 16.0 Hz, *J*<sub>2</sub> = 8.0 Hz, 1H), 2.47 (s, 3H), 2.37 (d, *J* = 16.0 Hz, 1H).

<sup>13</sup>C NMR (101 MHz, CDCl<sub>3</sub>) δ 145.0, 140.2, 133.6, 132.0, 130.0, 127.8, 127.5, 125.9, 122.2, 117.2, 62.4, 40.8, 21.7.

HRMS (EI): [C<sub>17</sub>H<sub>14</sub><sup>81</sup>BrCl<sub>2</sub>NO<sub>2</sub>S] calcd. For 446.9280; found 446.9275.

4,5-dichloro-1-tosyl-2-(4-(trifluoromethyl)phenyl)-2,3-dihydro-1H-pyrrole(**3g**)

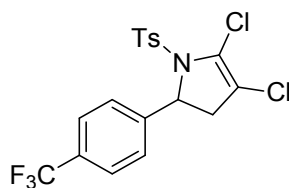

Follow the general procedure B, **3g** was obtained 53.9 mg (62%) as white viscous oil with *n*-hexane/ethyl acetate (10/1) used as eluent.

<sup>1</sup>H NMR (400 MHz, CDCl<sub>3</sub>) δ 7.75 (d, *J* = 8.0 Hz, 2H), 7.65 (d, *J* = 8.0 Hz, 2H), 7.48 (d, *J* = 8.0 Hz, 2H), 7.37 (d, *J* = 8.0 Hz, 2H), 5.33 (d, *J* = 8.0 Hz, 1H), 3.00 ~ 2.94 (dd, *J*<sub>1</sub> = 16.0 Hz, *J*<sub>2</sub> = 8.0 Hz, 1H), 2.47 (s, 3H), 2.40 (d, *J* = 16.0 Hz, 1H).

<sup>13</sup>C NMR (101 MHz, CDCl<sub>3</sub>) δ 145.1, 145.0, 133.5, 130.0, 127.9, 126.2, 126.0, 125.9, 117.1, 62.48, 40.90, 21.71.

HRMS (EI): [C<sub>18</sub>H<sub>14</sub>Cl<sub>2</sub>F<sub>3</sub>NO<sub>2</sub>S] calcd. For 435.0069; found 435.0065.

4,5-dichloro-2-(*o*-tolyl)-1-tosyl-2,3-dihydro-1H-pyrrole(**3h**)

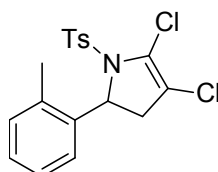

Follow the general procedure B, **3h** was obtained 49.5 mg (65%) as white solid with *n*-hexane/ethyl acetate (10/1) used as eluent.

Melting point: 150-152°C.

<sup>1</sup>H NMR (400 MHz, CDCl<sub>3</sub>) δ 7.75 (d, *J* = 8.0 Hz, 2H), 7.37 (t, *J* = 8.0 Hz, 3H), 7.22 – 7.19 (m, 3H), 5.45 (d, *J* = 12.0 Hz, 1H), 3.04 ~ 2.97 (dd, *J*<sub>1</sub> = 16.0 Hz, *J*<sub>2</sub> = 12.0 Hz, 1H), 2.47 (s, 3H), 2.31 (s, 3H), 2.22 (d, *J* = 16.0 Hz, 1H).

<sup>13</sup>C NMR (101 MHz, CDCl<sub>3</sub>) δ 144.8, 139.7, 133.9, 133.4, 130.7, 129.9, 127.96, 127.93, 126.6, 126.1, 125.3, 117.0, 60.4, 40.9, 21.7, 19.1.

HRMS (EI): [C<sub>18</sub>H<sub>17</sub>Cl<sub>2</sub>NO<sub>2</sub>S] calcd. For 381.0352; found 381.0340.

2-(2-bromophenyl)-4,5-dichloro-1-tosyl-2,3-dihydro-1H-pyrrole(**3i**)

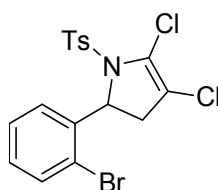

Follow the general procedure B, **3i** was obtained 48.0 mg (54%) as white viscous oil with *n*-hexane/ethyl acetate (25/1) used as eluent

<sup>1</sup>H NMR (400 MHz, CDCl<sub>3</sub>) δ 7.80 (d, *J* = 8.0 Hz, 2H), 7.58 ~ 7.52 (m, 2H), 7.40 (d, *J* = 8.0 Hz, 3H), 7.19 (t, *J* = 8.0 Hz, 1H), 5.51 (d, *J* = 8.0 Hz, 1H), 3.04 ~ 2.97 (dd, *J*<sub>1</sub> = 16.0 Hz, *J*<sub>2</sub> = 8.0 Hz, 1H), 2.48 (s, 3H), 2.22 (d, *J* = 16.0 Hz, 1H).

<sup>13</sup>C NMR (101 MHz, CDCl<sub>3</sub>) δ 145.1, 140.3, 133.1, 132.9, 130.1, 129.5, 128.0, 127.4, 126.0, 121.1, 117.7, 62.7, 41.0, 21.7.

HRMS (EI): [C<sub>17</sub>H<sub>14</sub>BrCl<sup>37</sup>ClNO<sub>2</sub>S] calcd. For 446.9271; found 446.9269.

2-(tert-butyl)-4,5-dichloro-1-tosyl-2,3-dihydro-1H-pyrrole(**3j**)

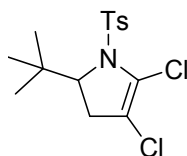

Follow the general procedure B, **3j** was obtained 43.0 mg (62%) as white viscous oil with *n*-hexane/ethyl acetate (10/1) used as eluent.

<sup>1</sup>H NMR (400 MHz, CDCl<sub>3</sub>) δ 7.72 (d, *J* = 8.0 Hz, 2H), 7.33 (d, *J* = 8.0 Hz, 2H), 3.91 (d, *J* = 8.0 Hz, 1H), 2.46 (s, 3H), 2.18 ~ 2.06 (m, 2H), 0.93 (s, 9H).

<sup>13</sup>C NMR (101 MHz, CDCl<sub>3</sub>) δ 144.7, 133.2, 129.7, 128.0, 127.3, 122.0, 70.1, 35.4, 34.0, 25.1, 21.7.

HRMS (EI): [C<sub>15</sub>H<sub>19</sub>Cl<sub>2</sub>NO<sub>2</sub>S] calcd. For 347.0508; found 347.0510.

4,5-dichloro-2-cyclohexyl-1-tosyl-2,3-dihydro-1H-pyrrole(**3k**)

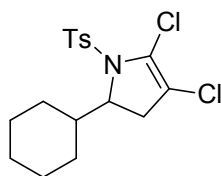

Follow the general procedure B, **3k** was obtained 42.5 mg (57%) as white viscous oil with *n*-hexane/ethyl acetate (10/1) used as eluent.

$^1\text{H}$  NMR (400 MHz,  $\text{CDCl}_3$ )  $\delta$  7.71 (d,  $J = 8.0$  Hz, 2H), 7.33 (d,  $J = 8.0$  Hz, 2H), 4.03 ~ 3.99 (m, 1H), 2.45 (s, 3H), 2.27 ~ 2.21 (m, 1H), 2.09 ~ 2.05 (m, 1H), 1.78 (d,  $J = 12.0$  Hz, 2H), 1.71 ~ 1.68 (m, 3H), 1.25 ~ 0.96 (m, 6H).

$^{13}\text{C}$  NMR (101 MHz,  $\text{CDCl}_3$ )  $\delta$  144.6, 133.4, 129.8, 127.8, 126.3, 120.3, 66.1, 43.2, 35.0, 27.6, 27.3, 26.2, 25.9, 25.8, 21.6.

HRMS (EI):  $[\text{C}_{17}\text{H}_{21}\text{Cl}_2\text{NO}_2\text{S}]$  calcd. For 373.0664; found 373.0659.

4,5-dichloro-2-(furan-2-yl)-1-tosyl-2,3-dihydro-1H-pyrrole(**3l**):

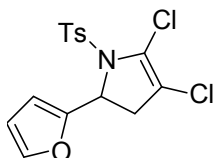

Follow the general procedure B, **3l** was obtained 39.2 mg (55%) as white viscous oil with *n*-hexane/ethyl acetate (10/1) used as eluent.

$^1\text{H}$  NMR (400 MHz,  $\text{CDCl}_3$ )  $\delta$  7.74 (d,  $J = 8.0$  Hz, 2H), 7.39 (s, 1H), 7.35 (m,  $J = 8.0$  Hz, 2H), 6.42 (s, 1H), 6.36 (s, 1H), 5.38 (d,  $J = 8.0$  Hz, 1H), 2.78 ~ 2.72 (m, 1H), 2.65 ~ 2.61 (m, 1H), 2.46 (s, 3H).

$^{13}\text{C}$  NMR (101 MHz,  $\text{CDCl}_3$ )  $\delta$  152.2, 144.9, 142.9, 133.9, 129.9, 127.9, 125.7, 118.0, 110.5, 107.9, 57.4, 37.3, 21.7.

HRMS (EI):  $[\text{C}_{15}\text{H}_{13}\text{Cl}_2\text{NO}_3\text{S}]$  calcd. For 356.9988; found 356.9979.

2-(3-(benzyloxy)propyl)-4,5-dichloro-1-tosyl-2,3-dihydro-1H-pyrrole(**3m**)

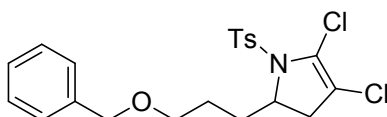

Follow the general procedure B, **3m** was obtained 56.2 mg (64%) as white viscous oil with *n*-hexane/ethyl acetate (10/1) used as eluent.

$^1\text{H}$  NMR (400 MHz,  $\text{CDCl}_3$ )  $\delta$  7.69 (d,  $J = 8.0$  Hz, 2H), 7.35 ~ 7.30 (m, 7H), 4.51 (s, 2H), 4.24 ~ 4.21 (m, 1H), 3.57 ~ 3.51 (m, 2H), 2.45 (s, 3H), 2.39 ~ 2.33 (dd,  $J_1 = 16.0$  Hz,  $J_2 = 8.0$  Hz, 1H), 1.96 (d,  $J = 16.0$  Hz, 1H), 1.83 ~ 1.71 (m, 4H).

$^{13}\text{C}$  NMR (101 MHz,  $\text{CDCl}_3$ )  $\delta$  144.7, 138.4, 133.4, 129.9, 128.4, 127.8, 127.6, 127.5, 125.8, 119.7, 72.9, 69.7, 61.5, 38.0, 33.3, 24.8, 21.6.

HRMS (ESI):  $[\text{C}_{21}\text{H}_{23}\text{Cl}_2\text{NO}_3\text{S}+\text{H}]^+$  calcd. For 440.0770; found 440.0760.

4,5-dibromo-2-phenyl-1-tosyl-2,3-dihydro-1H-pyrrole(**4a**):

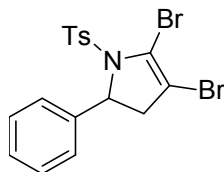

Follow the general procedure B, **4a** was obtained 63.6 mg (70%) as white viscous oil with *n*-hexane/ethyl acetate (10/1) used as eluent.

$^1\text{H}$  NMR (400 MHz,  $\text{CDCl}_3$ )  $\delta$  7.75 (d,  $J = 8.0$  Hz, 2H), 7.40 ~ 7.32 (m, 7H), 5.38 (d,  $J = 12.0$  Hz, 1H), 2.94 ~ 2.88 (dd,  $J_1 = 16.0$  Hz,  $J_2 = 8.0$  Hz, 1H), 2.48 ~ 2.44 (m, 1H), 2.46 (s, 3H).

$^{13}\text{C}$  NMR (101 MHz,  $\text{CDCl}_3$ )  $\delta$  144.7, 141.1, 134.0, 129.9, 128.9, 128.2, 127.9, 125.8, 117.8, 111.6, 64.6, 43.6, 21.7.

HRMS (EI):  $[\text{C}_{17}\text{H}_{15}\text{Br}^{\text{81}}\text{BrNO}_2\text{S}]$  calcd. For 456.9164; found 456.9170.

4,5-dibromo-2-(*p*-tolyl)-1-tosyl-2,3-dihydro-1H-pyrrole(**4b**)

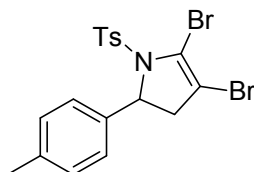

Follow the general procedure B, **4b** was obtained 73.1 mg (78%) as white viscous oil with *n*-hexane/ethyl acetate (10/1) used as eluent.

$^1\text{H}$  NMR (400 MHz,  $\text{CDCl}_3$ )  $\delta$  7.74 (d,  $J = 8.0$  Hz, 2H), 7.33 (d,  $J = 8.0$  Hz, 2H), 7.19 ~ 7.15 (m, 4H), 5.35 (d,  $J = 8.0$  Hz, 1H), 2.87 ~ 2.80 (dd,  $J_1 = 16.0$  Hz,  $J_2 = 8.0$  Hz, 1H), 2.48 ~ 2.44 (m, 1H), 2.46 (s, 3H), 2.34 (s, 3H).

$^{13}\text{C}$  NMR (100 MHz,  $\text{CDCl}_3$ )  $\delta$  144.5, 138.3, 137.8, 134.2, 129.8, 129.5, 127.9, 125.7, 98.1, 95.9, 65.6, 48.6, 21.7, 21.1.

HRMS (EI):  $[\text{C}_{18}\text{H}_{17}\text{Br}^{\text{81}}\text{BrNO}_2\text{S}]$  calcd. for 470.9321; found 470.9324.

4,5-dibromo-2-(4-methoxyphenyl)-1-tosyl-2,3-dihydro-1H-pyrrole(**4c**)

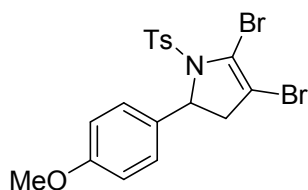

Follow the general procedure B, **4c** was obtained 68.8 mg (71%) as white viscous oil with *n*-hexane/ethyl acetate (10/1) used as eluent.

$^1\text{H}$  NMR (400 MHz,  $\text{CDCl}_3$ )  $\delta$  7.73 (d,  $J = 8.0$  Hz, 2H), 7.33 (d,  $J = 8.0$  Hz, 2H), 7.25 (d,  $J = 8.0$  Hz, 2H), 6.89 (d,  $J = 8.0$  Hz, 2H), 5.33 (d,  $J = 8.0$  Hz, 1H), 3.81 (s, 3H), 2.91 ~ 2.84 (dd,  $J_1 = 16.0$  Hz,  $J_2 = 12.0$  Hz, 1H), 2.47 ~ 2.43 (m, 1H), 2.46 (s, 3H).

$^{13}\text{C}$  NMR (101 MHz,  $\text{CDCl}_3$ )  $\delta$  159.5, 144.7, 134.2, 133.3, 129.8, 127.9, 127.1, 117.6, 114.2, 111.6, 64.3, 55.3, 43.5, 21.7.

HRMS (EI):  $[\text{C}_{18}\text{H}_{17}\text{Br}^{\text{81}}\text{BrNO}_3\text{S}]$  calcd. For 486.9270; found 486.9268.

4,5-dibromo-2-(4-fluorophenyl)-1-tosyl-2,3-dihydro-1H-pyrrole(**4d**)

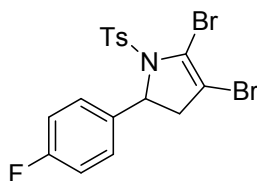

Follow the general procedure B, **4d** was obtained 70.9 mg (75%) as white viscous oil with *n*-hexane/ethyl acetate (10/1) used as eluent.

$^1\text{H}$  NMR (400 MHz,  $\text{CDCl}_3$ )  $\delta$  7.74 (d,  $J = 8.0$  Hz, 2H), 7.36 ~ 7.29 (m, 4H), 7.06 (t,  $J = 8.0$  Hz, 2H), 5.35 (d,  $J = 8.0$  Hz, 1H), 2.94 ~ 2.87 (dd,  $J_1 = 16.0$  Hz,  $J_2 = 12.0$  Hz, 1H), 2.46 (s, 3H), 2.46 ~ 2.41 (m, 1H).

$^{13}\text{C}$  NMR (100 MHz,  $\text{CDCl}_3$ )  $\delta$  163.7, 161.2, 144.9, 137.0, 133.9, 129.9, 127.9, 127.69, 117.7, 115.9, 111.4, 63.9, 43.6, 21.7.

HRMS (EI):  $[\text{C}_{17}\text{H}_{14}\text{Br}^{\text{81}}\text{BrFNO}_2\text{S}]$  calcd. for 474.9070; found 474.9061.

4,5-dibromo-2-(4-chlorophenyl)-1-tosyl-2,3-dihydro-1H-pyrrole(**4e**)

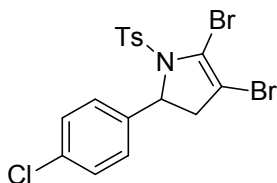

Follow the general procedure B, **4e** was obtained 66.4 mg (68%) as white viscous oil with *n*-hexane/ethyl acetate (10/1) used as eluent.

$^1\text{H}$  NMR (400 MHz,  $\text{CDCl}_3$ )  $\delta$  7.67 (d,  $J = 8.0$  Hz, 2H), 7.27 (d,  $J = 8.0$  Hz, 4H), 7.20 (d,  $J = 8.0$  Hz, 2H), 5.27 (d,  $J = 12.0$  Hz, 1H), 2.87 ~ 2.80 (dd,  $J_1 = 16.0$  Hz,  $J_2 = 8.0$  Hz, 1H), 2.39 (s, 3H) 2.36 ~ 2.32 (m, 1H).

$^{13}\text{C}$  NMR (101 MHz,  $\text{CDCl}_3$ )  $\delta$  144.9, 139.6, 134.0, 133.8, 129.9, 129.1, 127.9, 127.2, 117.7, 111.3, 63.9, 43.5, 21.7.

HRMS (EI):  $[\text{C}_{17}\text{H}_{14}\text{Br}^{\text{81}}\text{BrClNO}_2\text{S}]$  calcd. for 490.8795; found 490.8789.

4,5-dibromo-2-(4-bromophenyl)-1-tosyl-2,3-dihydro-1H-pyrrole(**4f**)

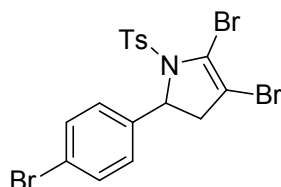

Follow the general procedure B, **4f** was obtained 70.3 mg (66%) as white solid with *n*-hexane/ethyl acetate (10/1) used as eluent.

Melting point: 172 - 174 °C.

$^1\text{H}$  NMR (400 MHz,  $\text{CDCl}_3$ )  $\delta$  7.74 (d,  $J = 8.0$  Hz, 2H), 7.50 (d,  $J = 8.0$  Hz, 2H), 7.35 (d,  $J = 8.0$  Hz, 2H), 7.21 (d,  $J = 8.0$  Hz, 2H), 5.32 (d,  $J = 8.0$  Hz, 1H), 2.94 ~ 2.87 (dd,  $J_1 = 16.0$  Hz,  $J_2 = 12.0$  Hz, 1H), 2.46 (s, 3H), 2.41 (d,  $J = 16.0$  Hz, 1H).

$^{13}\text{C}$  NMR (101 MHz,  $\text{CDCl}_3$ )  $\delta$  144.9, 140.1, 133.7, 132.0, 129.9, 127.9, 127.5, 122.1, 117.7, 111.3, 63.9, 43.5, 21.7.

HRMS (EI):  $[\text{C}_{17}\text{H}_{14}\text{Br}_2^{\text{81}}\text{BrNO}_2\text{S}]$  calcd. for 534.8269; found 534.8270.

4,5-dibromo-1-tosyl-2-(4-(trifluoromethyl)phenyl)-2,3-dihydro-1H-pyrrole(**4g**)

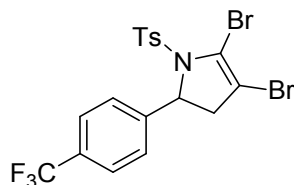

Follow the general procedure B, **4g** was obtained 73.2 mg (70%) as white viscous oil with *n*-hexane/ethyl acetate (10/1) used as eluent.

$^1\text{H}$  NMR (400 MHz,  $\text{CDCl}_3$ )  $\delta$  7.75 (d,  $J = 4.0$  Hz, 2H), 7.64 (d,  $J = 8.0$  Hz, 2H), 7.46 (d,  $J = 8.0$  Hz, 2H), 7.36 (d,  $J = 8.0$  Hz, 2H), 5.41 (d,  $J = 12.0$  Hz, 1H), 2.99 ~ 2.93 (dd,  $J_1 = 16.0$  Hz,  $J_2 = 8.0$  Hz, 1H), 2.47 (s, 3H), 2.45 ~ 2.41 (m, 1H).

$^{13}\text{C}$  NMR (101 MHz,  $\text{CDCl}_3$ )  $\delta$  145.1, 145.0, 133.7, 130.0, 127.9, 126.2, 126.0, 125.9, 117.8, 111.2, 64.0, 43.6, 21.7.

HRMS (EI):  $[\text{C}_{18}\text{H}_{14}\text{Br}^{\text{81}}\text{BrF}_3\text{NO}_2\text{S}]$  calcd. for 524.9038; found 524.9030.



4,5-dibromo-2-(*o*-tolyl)-1-tosyl-2,3-dihydro-1H-pyrrole(**4h**)

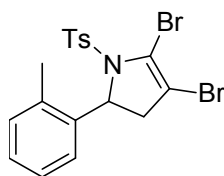

Follow the general procedure B, **4h** was obtained 66.5 mg (71%) as white solid with *n*-hexane/ethyl acetate (10/1) used as eluent.

Melting point: 156-158 °C.

<sup>1</sup>H NMR (400 MHz, CDCl<sub>3</sub>) δ 7.76 (d, *J* = 8.0 Hz, 2H), 7.35 (d, *J* = 8.0 Hz, 3H), 7.23 ~ 7.17 (m, 3H), 5.54 (d, *J* = 8.0 Hz, 1H), 3.04 ~ 2.97 (dd, *J*<sub>1</sub> = 16.0 Hz, *J*<sub>2</sub> = 12.0 Hz, 1H), 2.46 (s, 3H), 2.31 (s, 3H), 2.25 (d, *J* = 16.0 Hz, 1H).

<sup>13</sup>C NMR (101 MHz, CDCl<sub>3</sub>) δ 144.7, 139.6, 134.0, 133.3, 130.7, 129.8, 128.0, 127.9, 126.6, 125.3, 117.9, 111.2, 62.0, 43.7, 21.7, 19.1.

HRMS (EI): [C<sub>18</sub>H<sub>17</sub>Br<sup>81</sup>BrNO<sub>2</sub>S] calcd. for 470.9321; found 470.9305.

4,5-dibromo-2-(2-bromophenyl)-1-tosyl-2,3-dihydro-1H-pyrrole(**4i**)

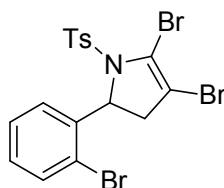

Follow the general procedure B, **4i** was obtained 61.8 mg (58%) as white solid with *n*-hexane/ethyl acetate (25/1) used as eluent.

Melting point: 178 °C.

<sup>1</sup>H NMR (400 MHz, CDCl<sub>3</sub>) δ 7.81 (d, *J* = 8.0 Hz, 2H), 7.57 (d, *J* = 8.0 Hz, 1H), 7.49 (d, *J* = 8.0 Hz, 1H), 7.38 (t, *J* = 12.0 Hz, 3H), 7.19 (t, *J* = 8.0 Hz, 1H), 5.59 (d, *J* = 8.0 Hz, 1H), 3.02 ~ 2.96 (dd, *J*<sub>1</sub> = 16.0 Hz, *J*<sub>2</sub> = 8.0 Hz, 1H), 2.48 (s, 3H), 2.25 (d, *J* = 16.0 Hz, 1H).

<sup>13</sup>C NMR (101 MHz, CDCl<sub>3</sub>) δ 145.0, 140.3, 133.3, 132.9, 130.0, 129.5, 128.09, 128.06, 127.5, 121.0, 117.8, 111.9, 64.3, 43.8, 21.7.

HRMS (EI): [C<sub>17</sub>H<sub>14</sub>Br<sup>81</sup>Br<sub>2</sub>NO<sub>2</sub>S] calcd. for 536.8249; found 536.8247.

4,5-dibromo-2-(tert-butyl)-1-tosyl-2,3-dihydro-1H-pyrrole(**4j**)

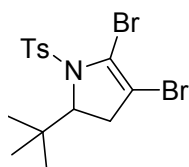

Follow the general procedure B, **4j** was obtained 47.8 mg (55%) as white viscous oil with *n*-hexane/ethyl acetate (10/1) used as eluent.

<sup>1</sup>H NMR (400 MHz, CDCl<sub>3</sub>) δ 7.73 (d, *J* = 8.0 Hz, 2H), 7.33 (d, *J* = 8.0 Hz, 2H), 3.97 (t, *J* = 4.0 Hz, 1H), 2.45 (s, 3H), 2.11 (d, *J* = 4.0 Hz, 2H), 0.92 (s, 9H).

<sup>13</sup>C NMR (100 MHz, CDCl<sub>3</sub>) δ 144.7, 133.3, 129.7, 128.1, 119.6, 116.5, 71.8, 36.7, 35.4, 25.1, 21.7.

HRMS (EI): [C<sub>15</sub>H<sub>19</sub>Br<sup>81</sup>BrNO<sub>2</sub>S] calcd. for 436.9477; found 436.9479.

4,5-dibromo-2-cyclohexyl-1-tosyl-2,3-dihydro-1H-pyrrole(**4k**)

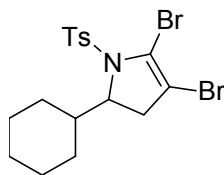

Follow the general procedure B, **4k** was obtained 54.4 mg (59%) as white viscous oil with *n*-hexane/ethyl acetate (10/1) used as eluent.

<sup>1</sup>H NMR (400 MHz, CDCl<sub>3</sub>) δ 7.72 (d, *J* = 8.0 Hz, 2H), 7.33 (d, *J* = 8.0 Hz, 2H), 4.09 (t, *J* = 8.0 Hz, 1H), 2.45 (s, 3H), 2.26 ~ 2.19 (dd, *J*<sub>1</sub> = 16.0 Hz, *J*<sub>2</sub> = 8.0 Hz, 1H), 2.09 (d, *J* = 16.0 Hz, 1H), 1.78 (d, *J* = 12.0 Hz, 2H), 1.67 (d, *J* = 12.0 Hz, 3H), 1.25 ~ 0.96 (m, 6H).

<sup>13</sup>C NMR (100 MHz, CDCl<sub>3</sub>) δ 144.6, 133.5, 129.8, 127.8, 118.4, 114.7, 67.7, 43.2, 37.8, 27.6, 27.3, 26.2, 25.9, 25.8, 21.7.

HRMS (EI): [C<sub>17</sub>H<sub>21</sub>Br<sup>81</sup>BrNO<sub>2</sub>S] calcd. for 462.9634; found 462.9640.

4,5-dibromo-2-(furan-2-yl)-1-tosyl-2,3-dihydro-1H-pyrrole(**4l**)

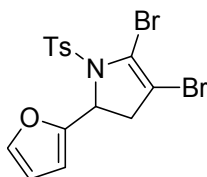

Follow the general procedure B, **4l** was obtained 51.6 mg (58%) as white viscous oil with *n*-hexane/ethyl acetate (10/1) used as eluent.

$^1\text{H}$  NMR (400 MHz,  $\text{CDCl}_3$ )  $\delta$  7.74 (d,  $J = 8.0$  Hz, 2H), 7.39 (s, 1H), 7.34 (d,  $J = 8.0$  Hz, 2H), 6.38 (d,  $J = 16.0$  Hz, 2H), 5.45 (d,  $J = 12.0$  Hz, 1H), 2.77 ~ 2.71 (m, 1H), 2.68 ~ 2.64 (m, 1H), 2.46 (s, 3H).

$^{13}\text{C}$  NMR (101 MHz,  $\text{CDCl}_3$ )  $\delta$  152.2, 144.8, 142.9, 134.0, 129.9, 127.9, 117.4, 112.0, 110.5, 107.8, 58.8, 40.0, 21.7.

HRMS (EI):  $[\text{C}_{15}\text{H}_{13}\text{Br}^{\text{81}}\text{BrNO}_3\text{S}]$  calcd. for 446.8957; found 446.8953.

2-(3-(benzyloxy)propyl)-4,5-dibromo-1-tosyl-2,3-dihydro-1H-pyrrole (**4m**)

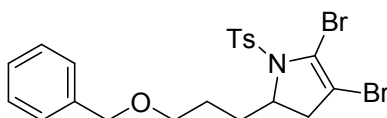

Follow the general procedure B, **4m** was obtained 57.9 mg (55%) as white viscous oil with *n*-hexane/ethyl acetate (10/1) used as eluent.

$^1\text{H}$  NMR (400 MHz,  $\text{CDCl}_3$ )  $\delta$  7.95 (d,  $J = 8.0$  Hz, 2H), 7.35 ~ 7.30 (m, 7H), 4.52 (s, 2H), 4.34 (d,  $J = 8.0$  Hz, 1H), 3.54 (t,  $J = 8.0$  Hz, 2H), 2.83 ~ 2.75 (m, 1H), 2.44 (s, 3H), 2.30 (d,  $J = 16.0$  Hz, 2H), 2.11 ~ 2.03 (m, 1H), 1.72 ~ 1.65 (m, 2H).

$^{13}\text{C}$  NMR (101 MHz,  $\text{CDCl}_3$ )  $\delta$  169.1, 145.5, 138.3, 135.1, 129.6, 128.5, 128.4, 127.6, 73.0, 69.6, 59.5, 40.2, 33.3, 31.2, 25.9, 21.7.

HRMS (ESI):  $[\text{C}_{21}\text{H}_{23}\text{Br}^{\text{81}}\text{BrNO}_3\text{S}+\text{H}]^+$  calcd. for 529.9759; found 529.9751.

4-bromo-5-(5-bromothiophen-2-yl)-2-phenyl-1-tosyl-2,3-dihydro-1H-pyrrole (**4o**)

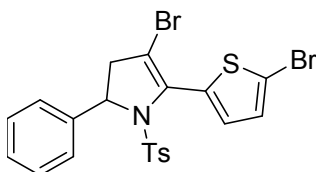

Follow the general procedure B, **4o** was obtained 55.8 mg (52%) as white solid with *n*-hexane/ethyl acetate (10/1) used as eluent.

Melting point: 160 °C.

$^1\text{H}$  NMR (400 MHz,  $\text{CDCl}_3$ )  $\delta$  7.66 (d,  $J = 8.0$  Hz, 2H), 7.37 ~ 7.33 (m, 8H), 7.06 (d,  $J = 4.0$  Hz, 1H), 5.28 (d,  $J = 8.0$  Hz, 1H), 2.75 ~ 2.69 (dd,  $J_1 = 16.0$  Hz,  $J_2 = 8.0$  Hz, 1H), 2.48 (s, 3H), 2.48 ~ 2.45 (m, 1H).

$^{13}\text{C}$  NMR (101 MHz,  $\text{CDCl}_3$ )  $\delta$  144.7, 141.1, 134.2, 133.7, 133.4, 130.4, 129.8, 129.5, 128.9, 128.0, 127.9, 125.6, 114.9, 109.4, 63.6, 44.5, 21.7.

HRMS (EI):  $[\text{C}_{21}\text{H}_{17}\text{Br}^{\text{81}}\text{BrNO}_2\text{S}_2]$  calcd. for 538.9042; found 538.9028.

## 4. $^1\text{H}$ and $^{13}\text{C}$ NMR Spectra:

$^1\text{H}$ ,  $^{13}\text{C}$ -NMR spectra of **2a**

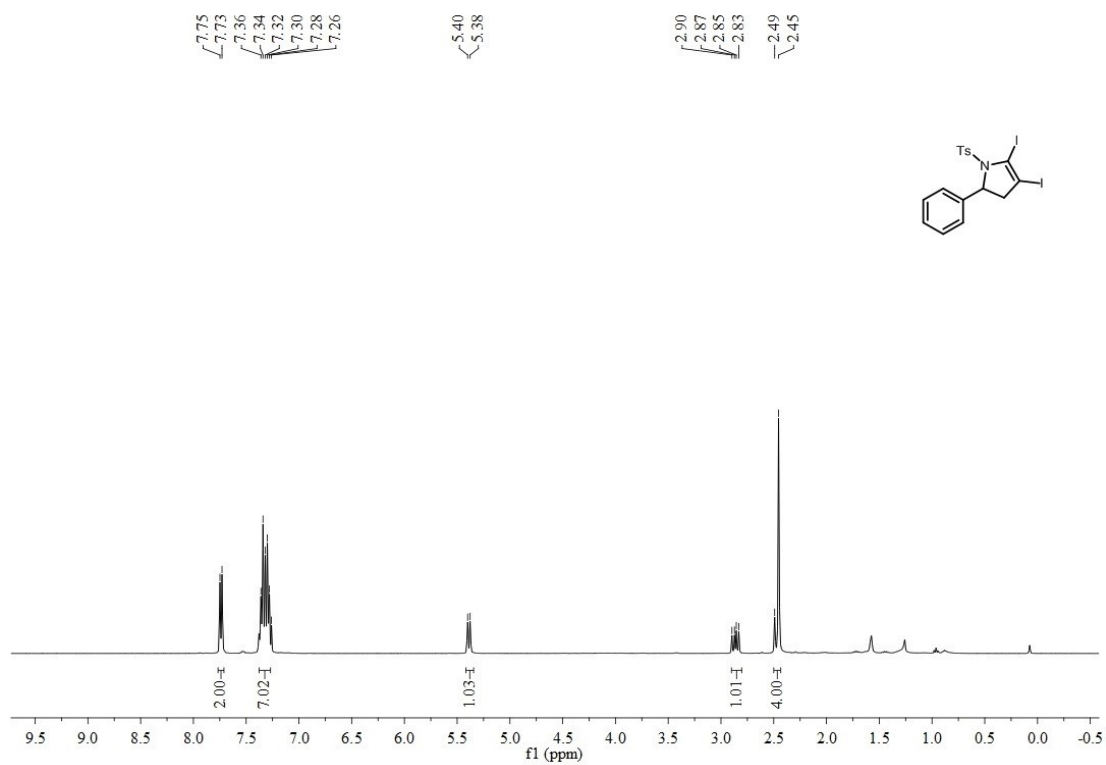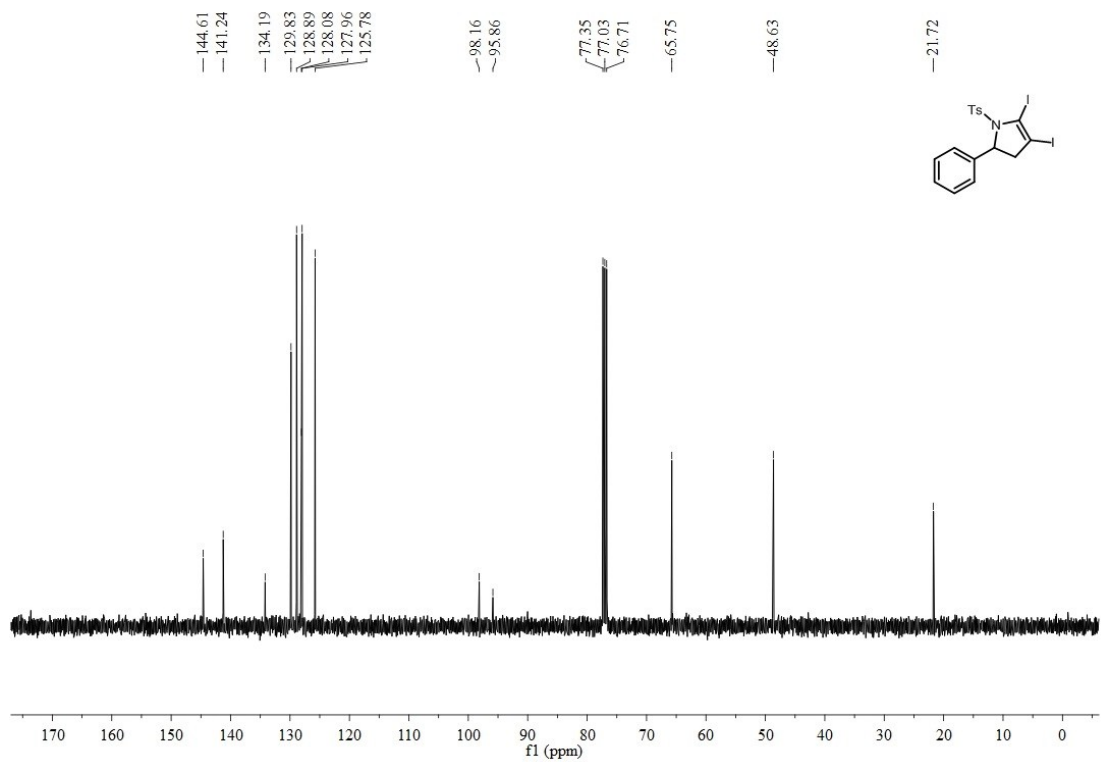

$^1\text{H}$ ,  $^{13}\text{C}$ -NMR spectra of **2b**

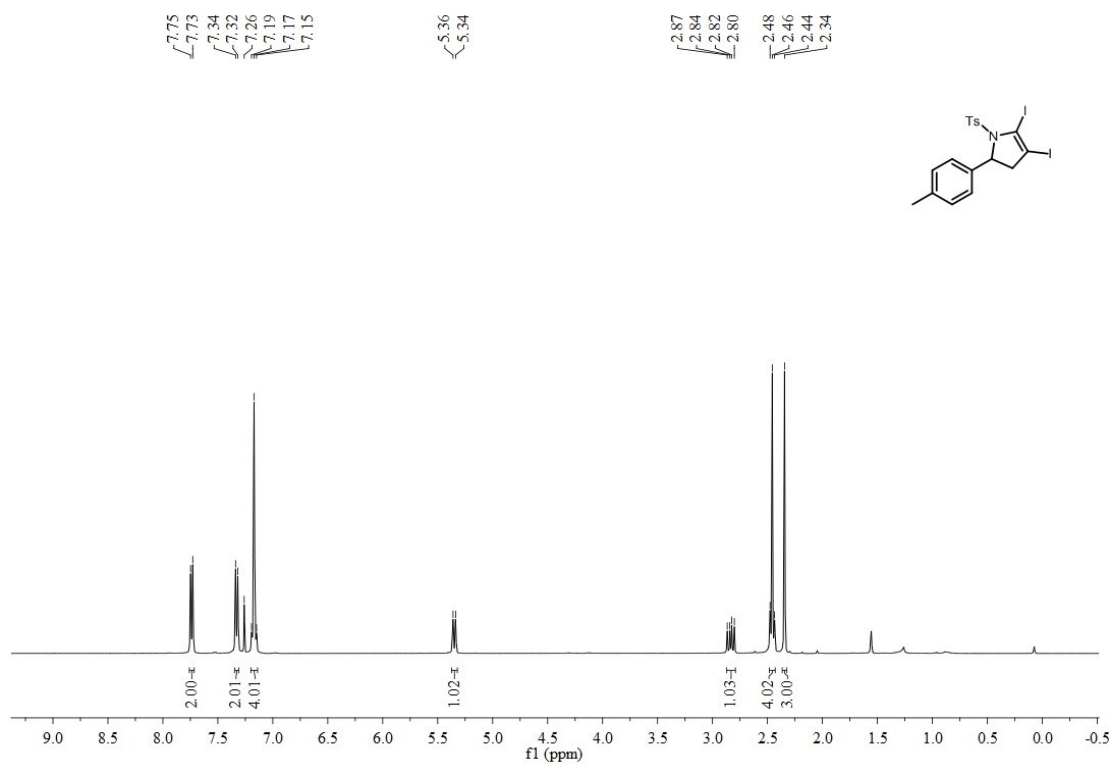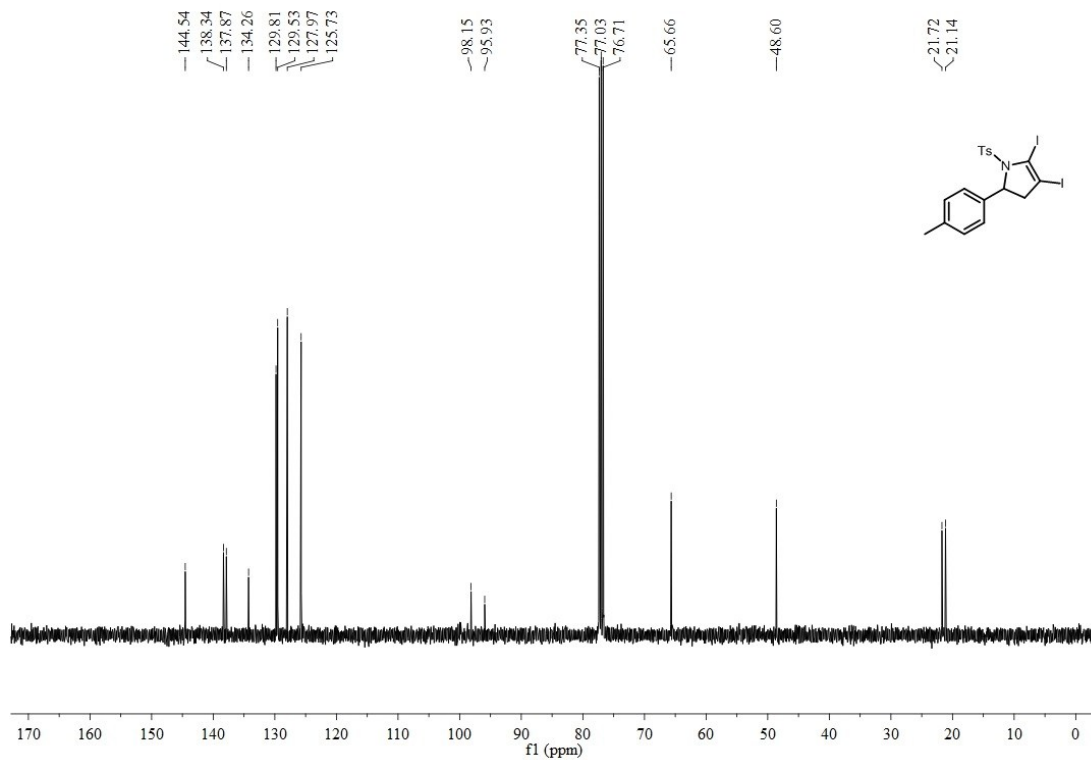

$^1\text{H}$ ,  $^{13}\text{C}$ -NMR spectra of **2c**

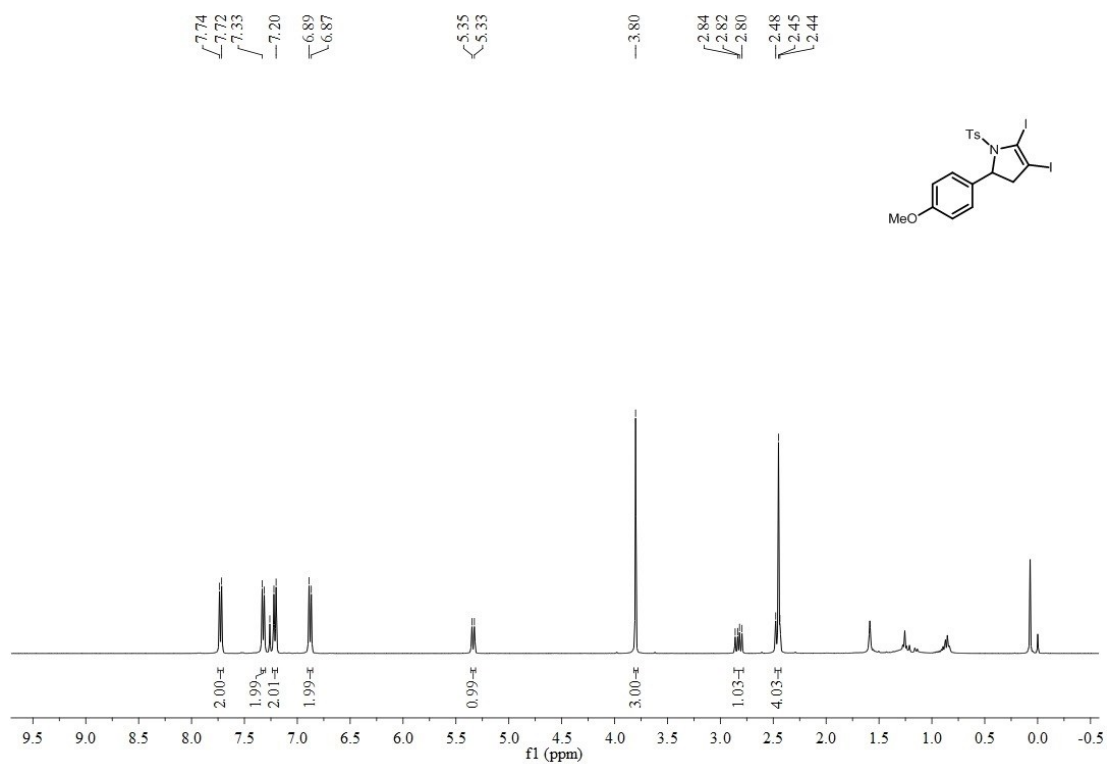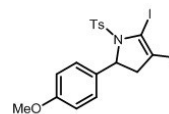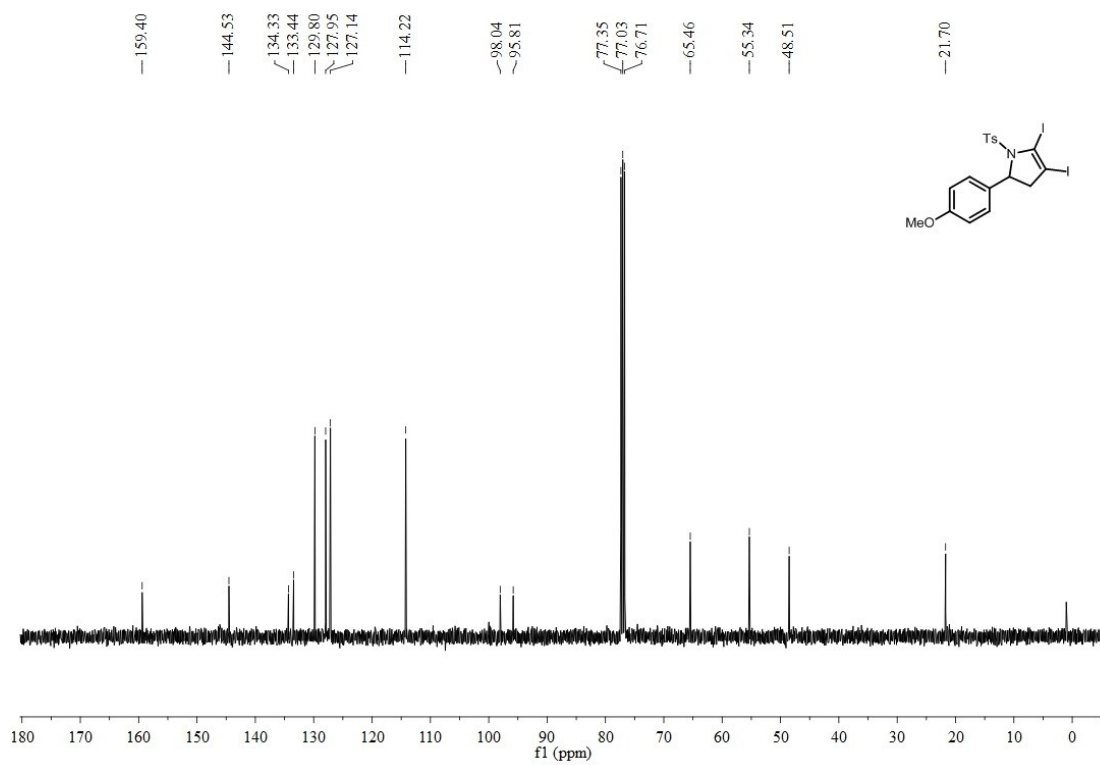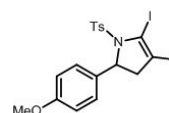

$^1\text{H}$ ,  $^{13}\text{C}$ -NMR spectra of **2d**

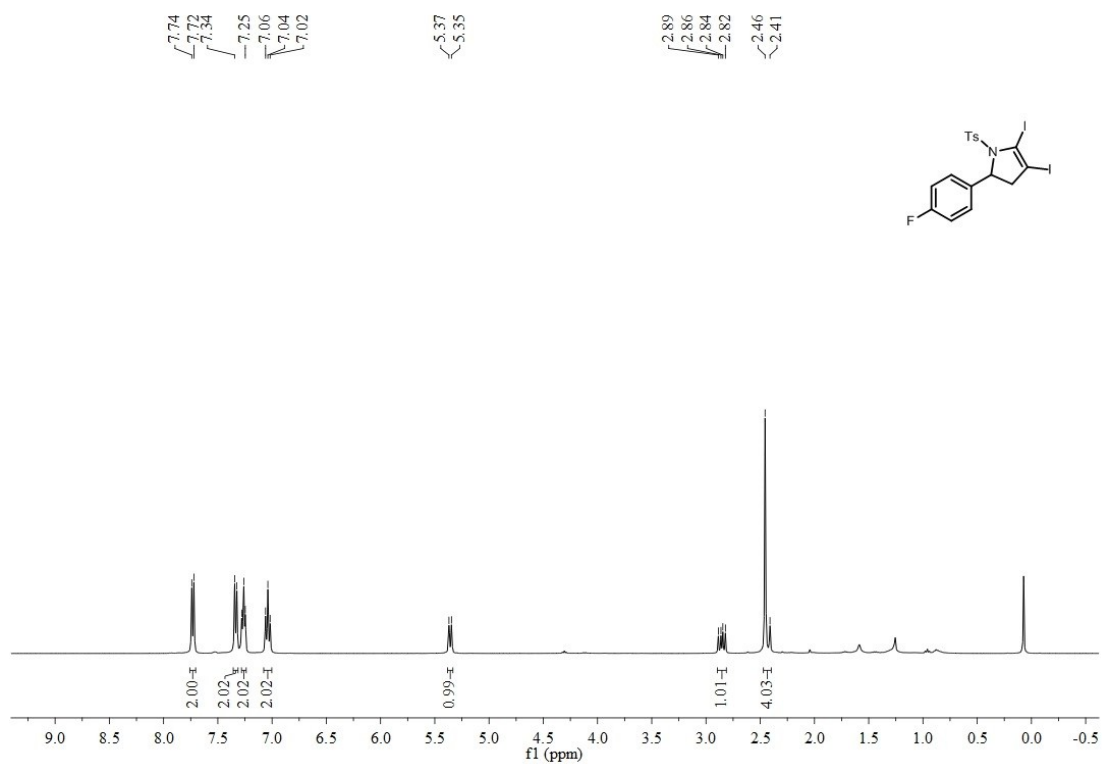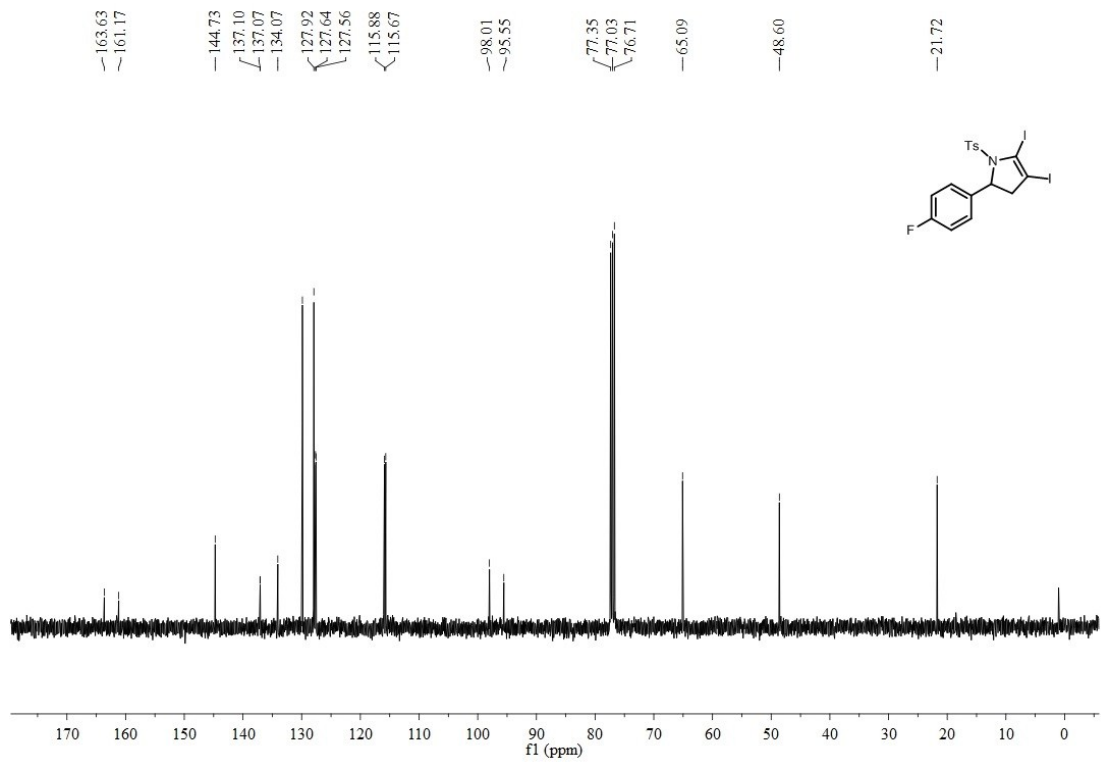

$^1\text{H}$ ,  $^{13}\text{C}$ -NMR spectra of **2e**

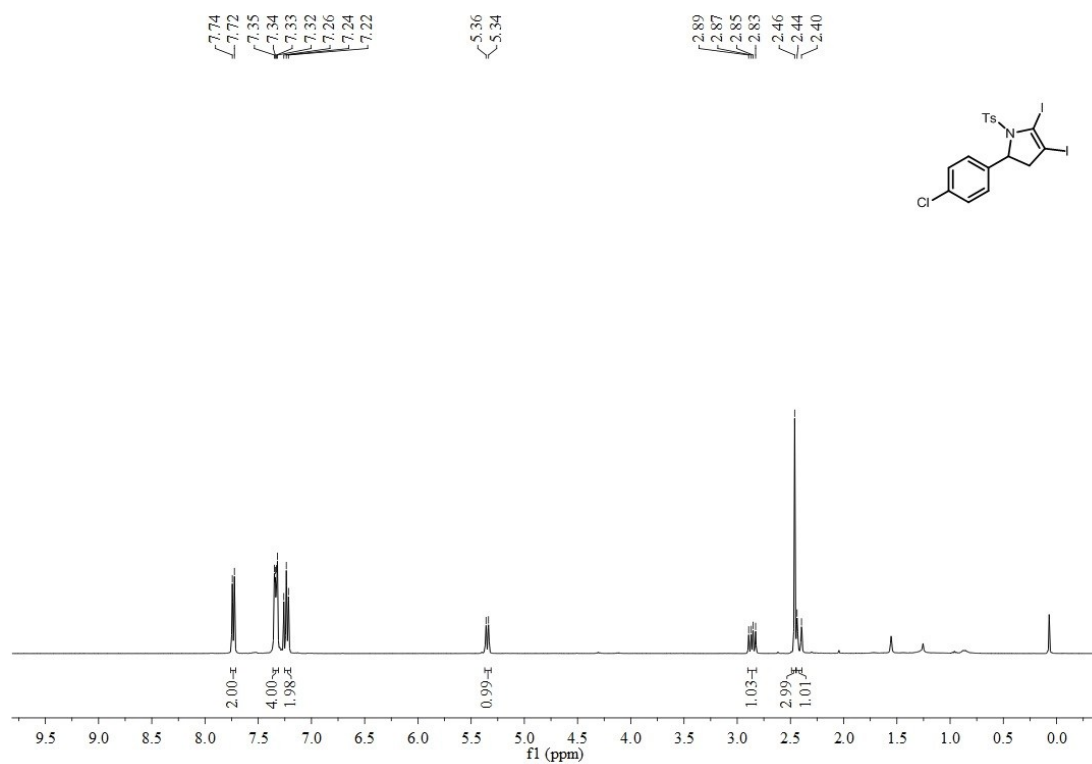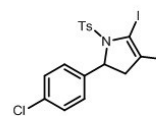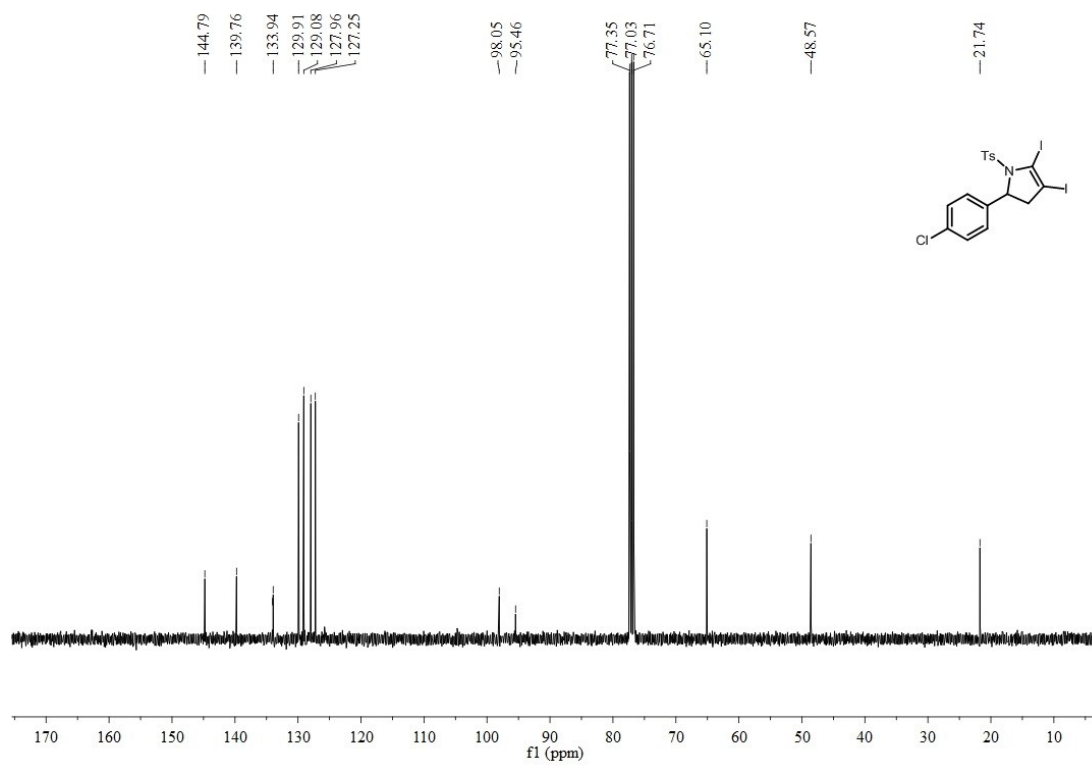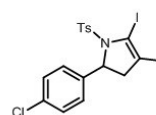



$^1\text{H}$ ,  $^{13}\text{C}$ -NMR spectra of **2f**

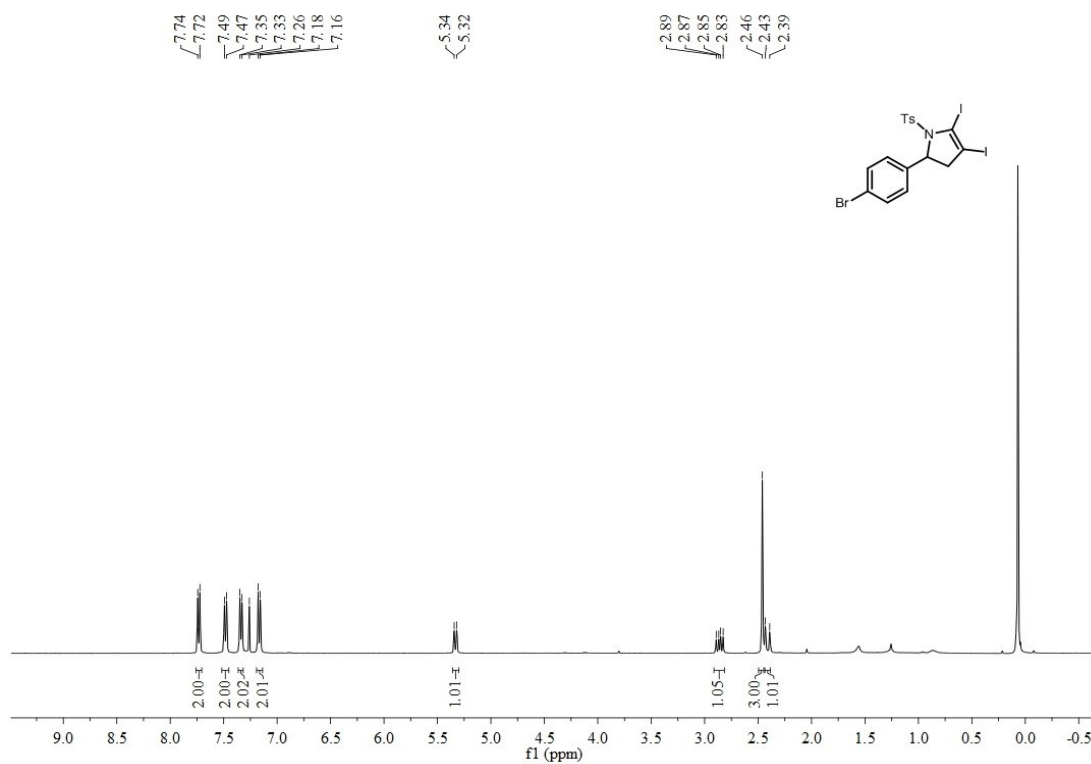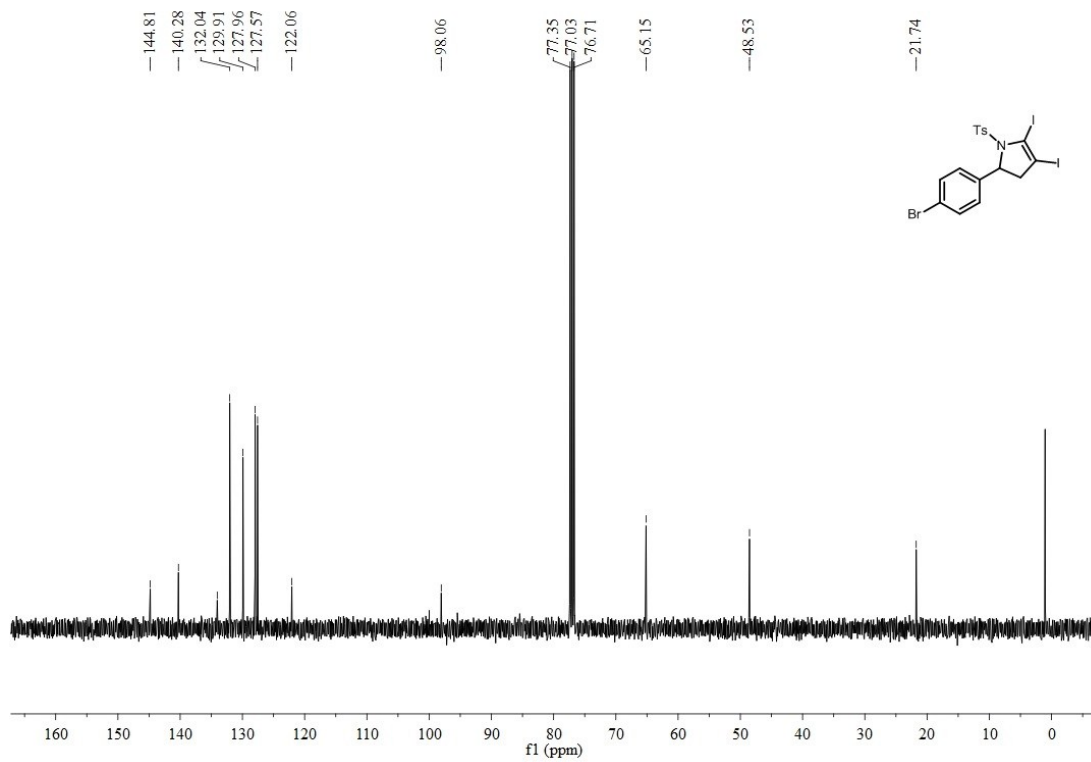

$^1\text{H}$ ,  $^{13}\text{C}$ -NMR spectra of **2g**

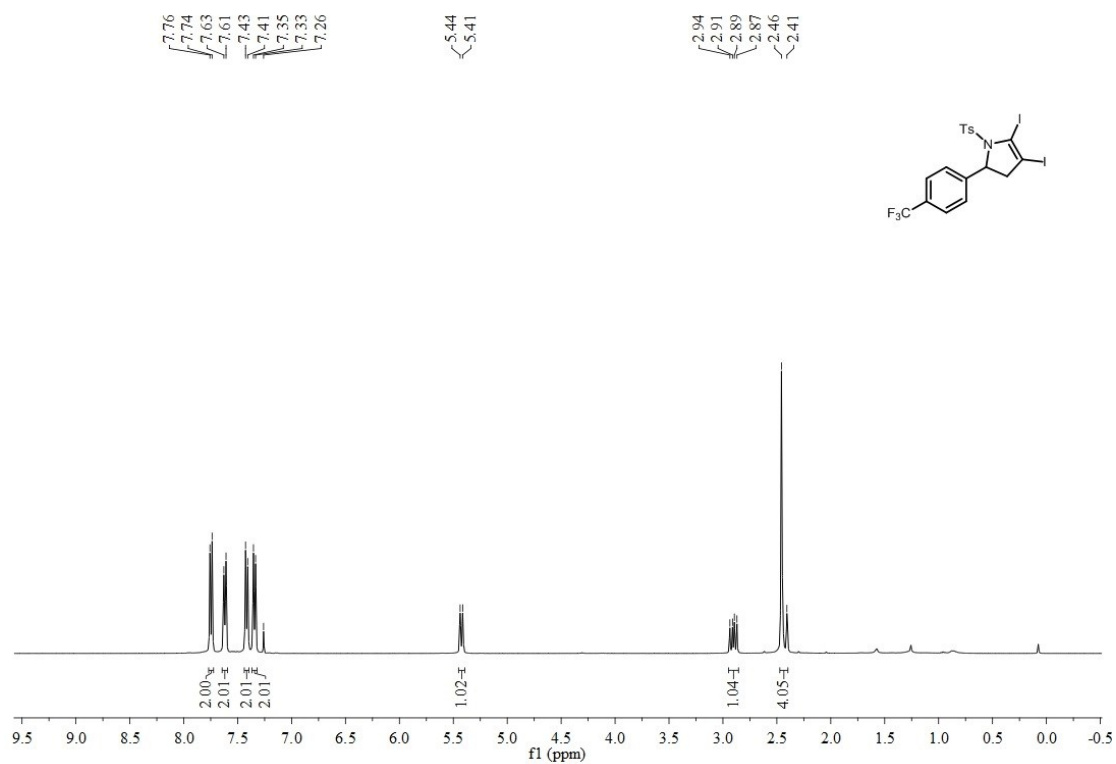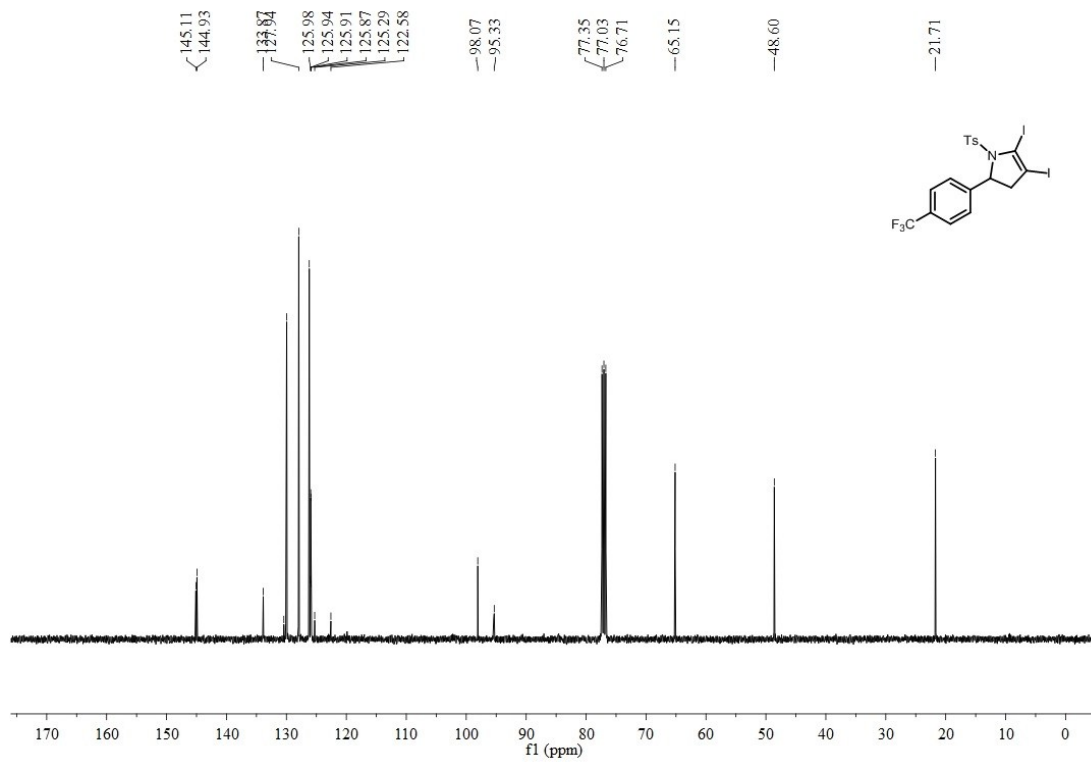

$^1\text{H}$ ,  $^{13}\text{C}$ -NMR spectra of **2h**

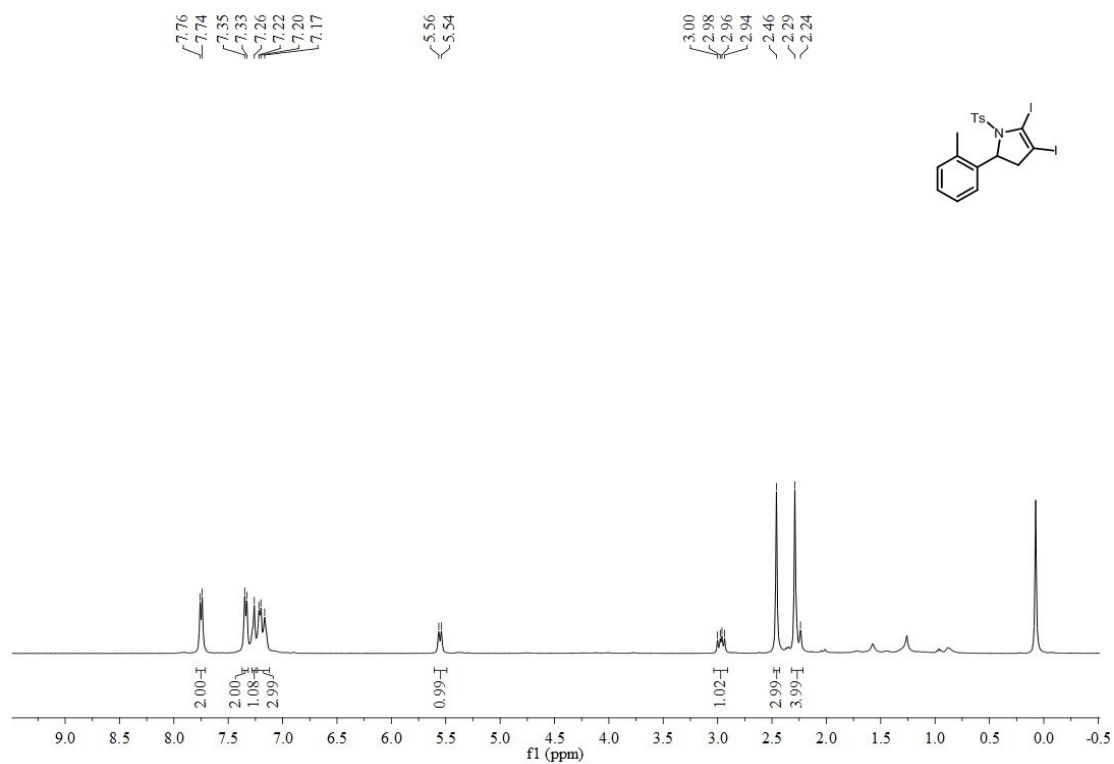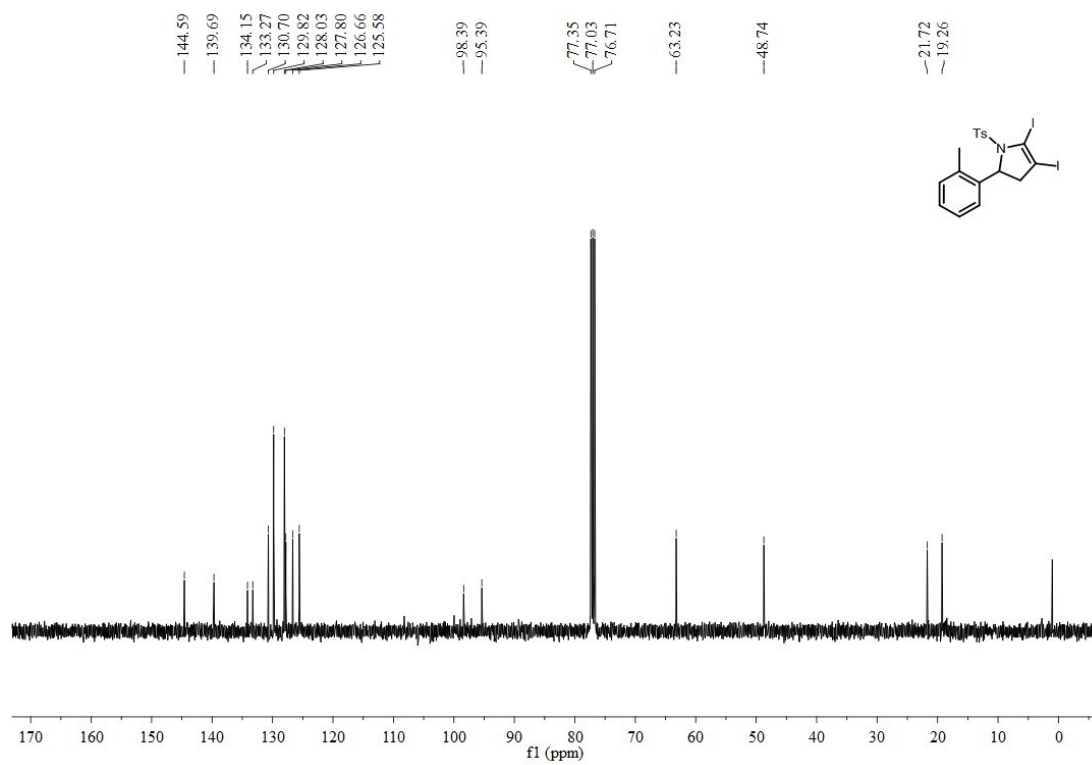

$^1\text{H}$ ,  $^{13}\text{C}$ -NMR spectra of **2i**

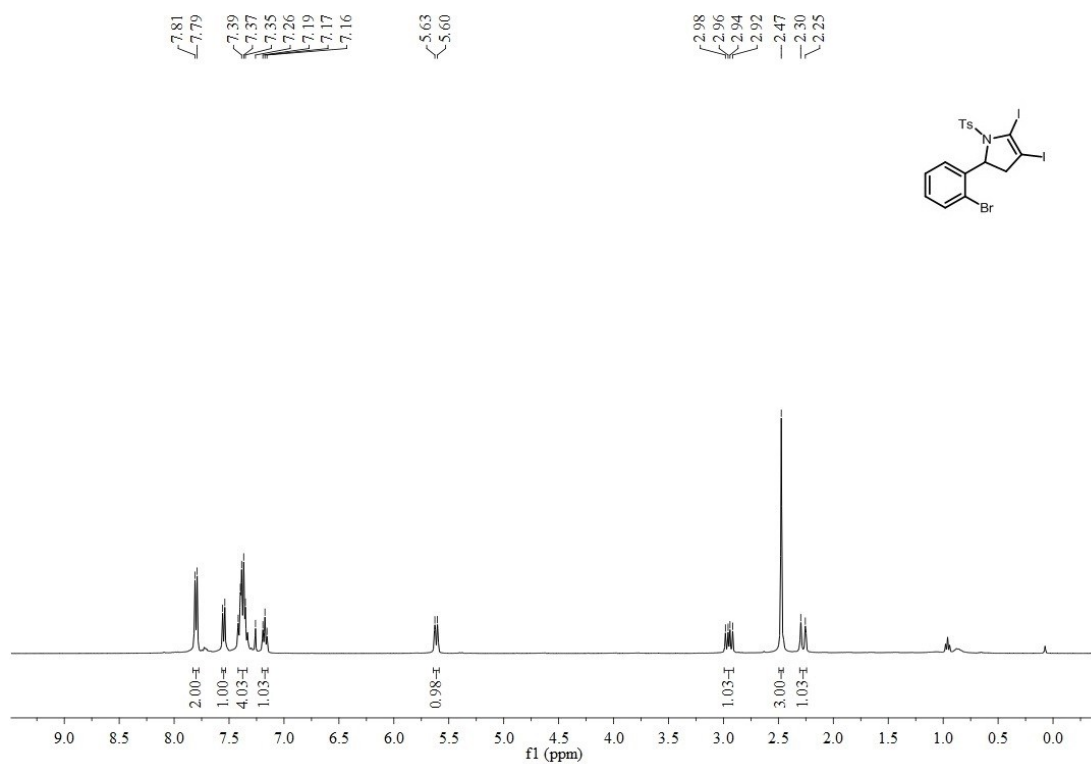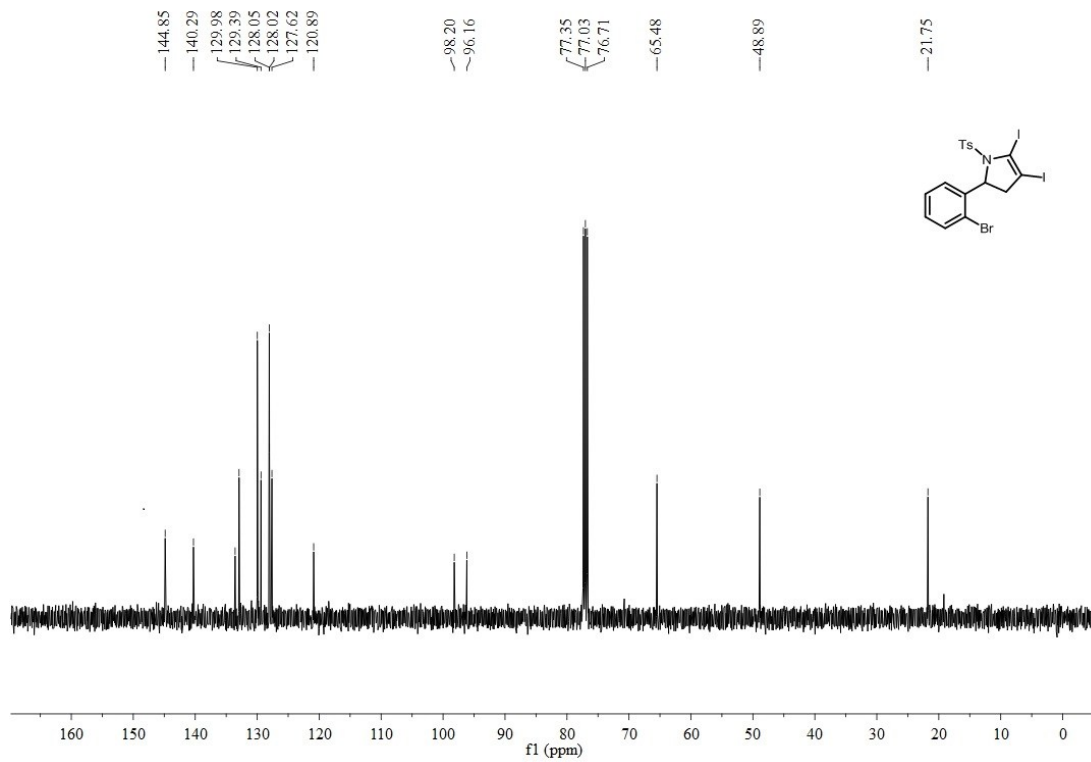

$^1\text{H}$ ,  $^{13}\text{C}$ -NMR spectra of **2j**

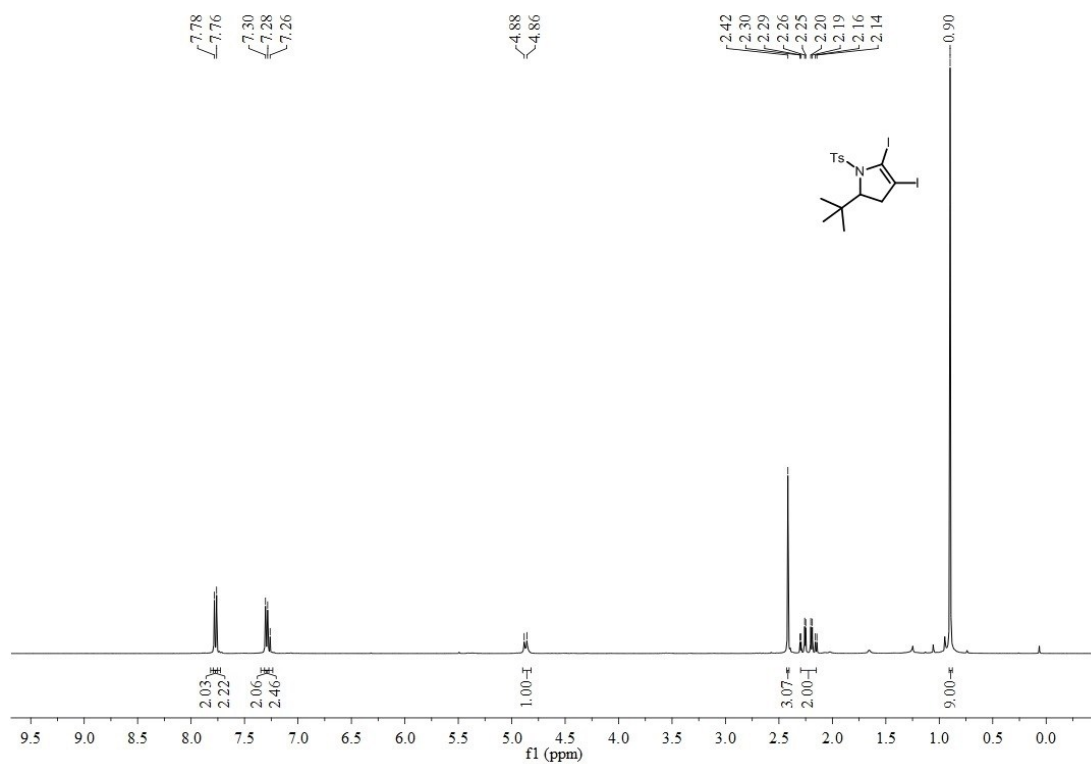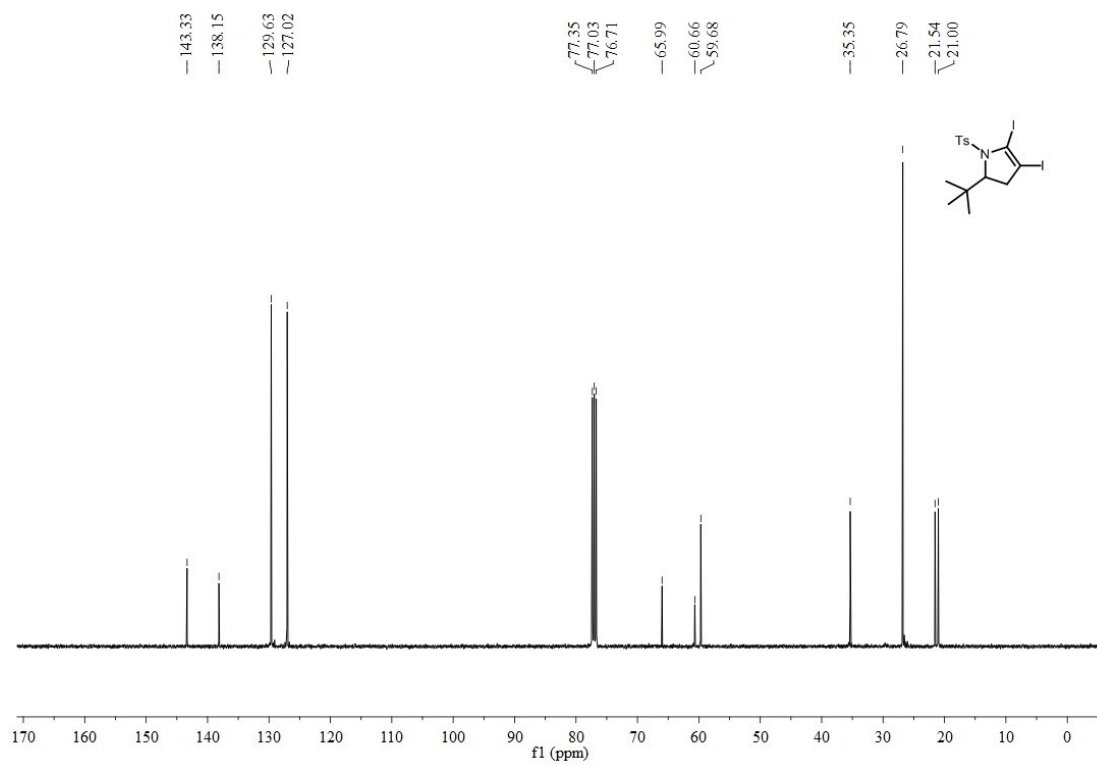

$^1\text{H}$ ,  $^{13}\text{C}$ -NMR spectra of **2k**

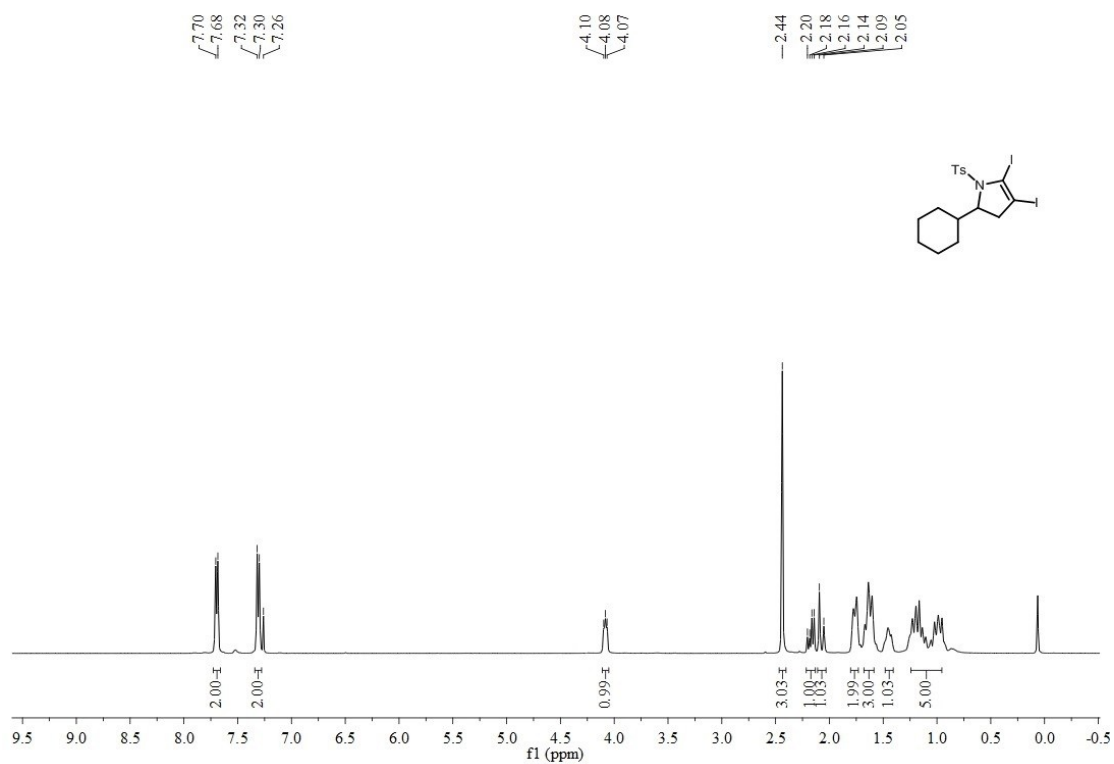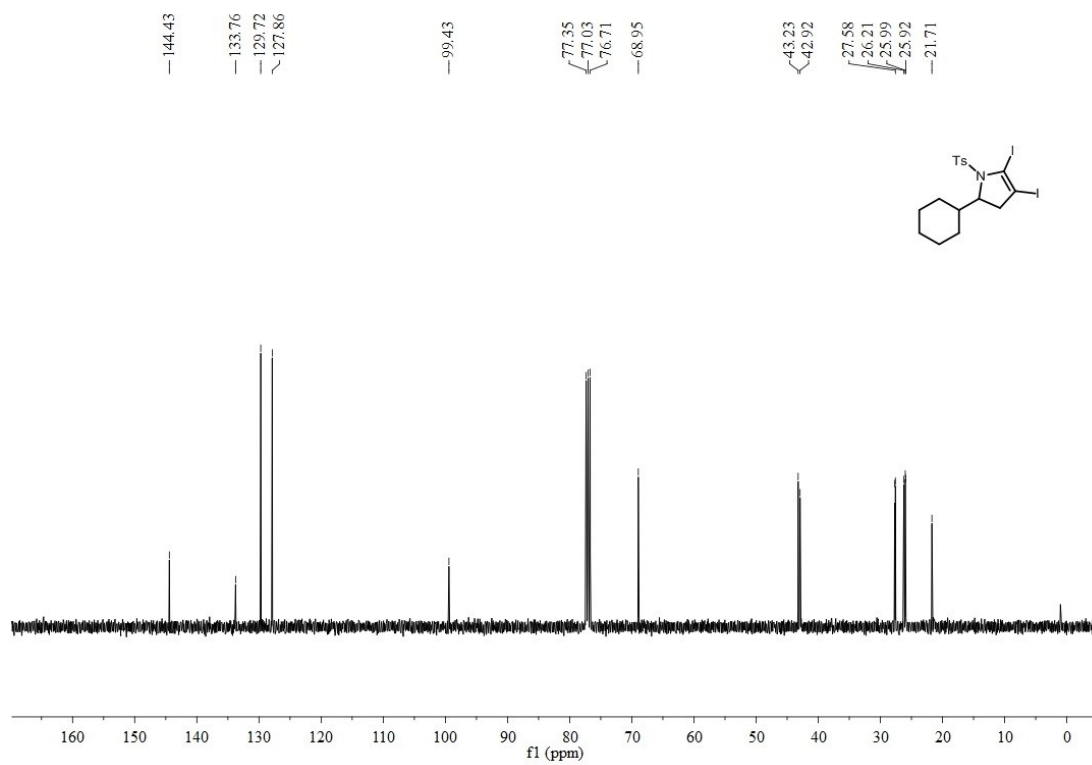

$^1\text{H}$ ,  $^{13}\text{C}$ -NMR spectra of **2I**

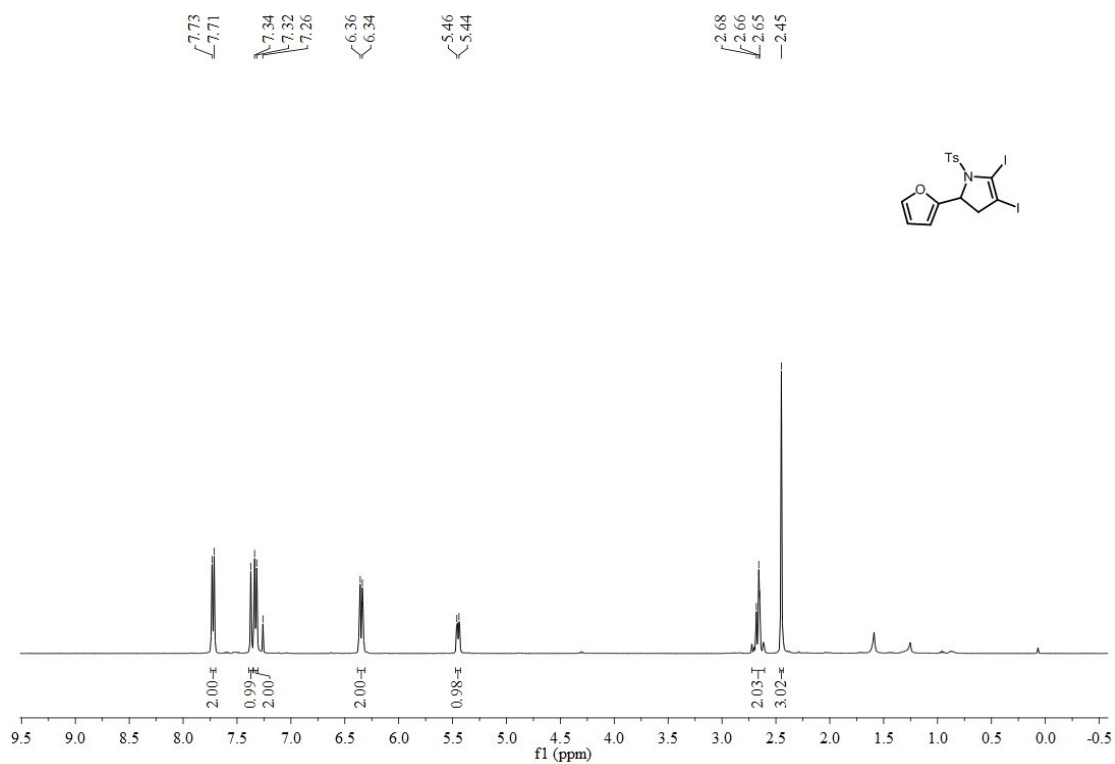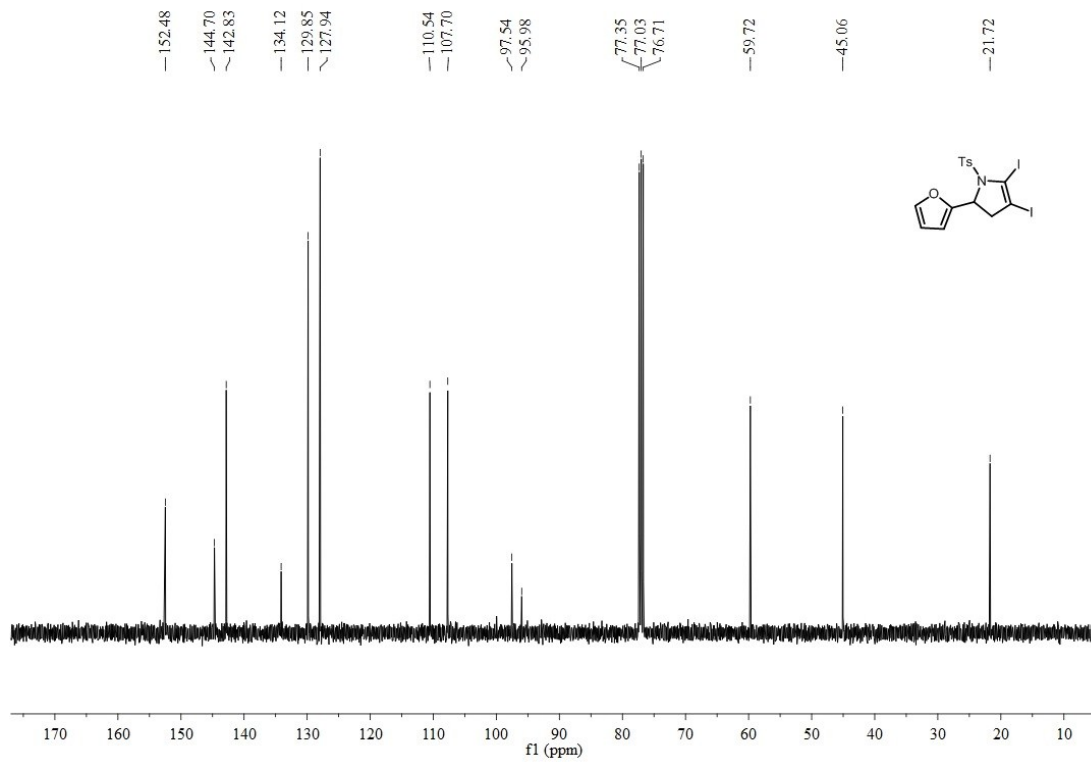

$^1\text{H}$ ,  $^{13}\text{C}$ -NMR spectra of **2m**

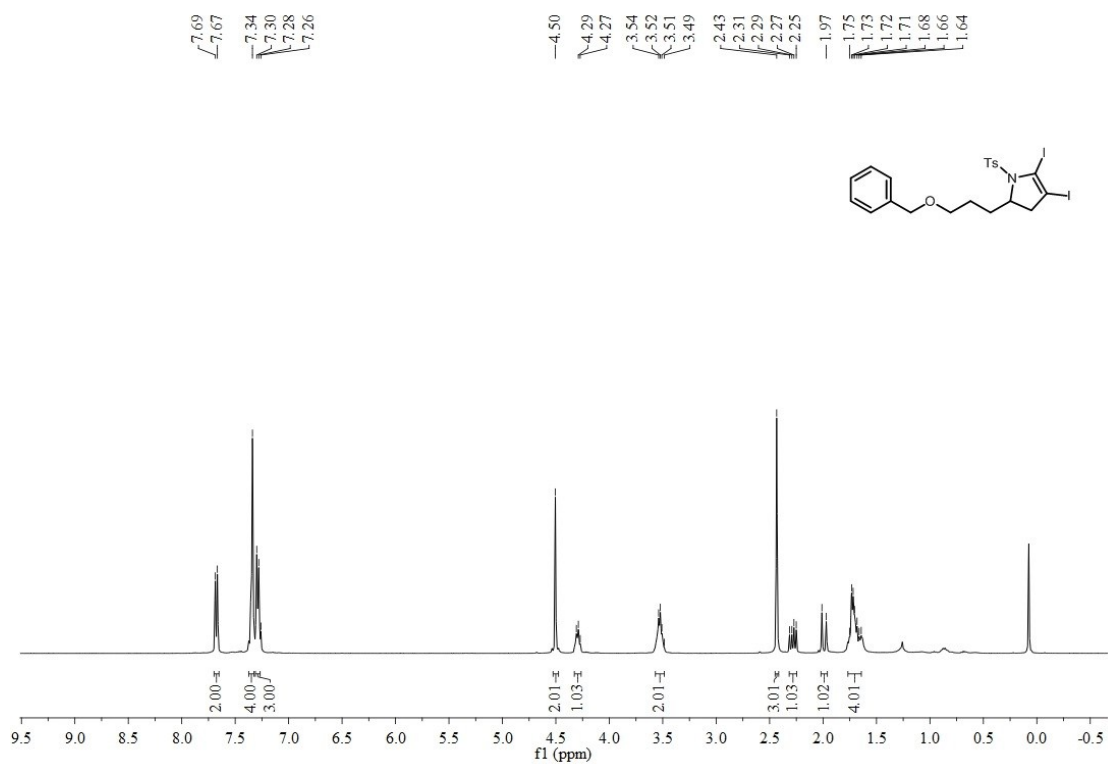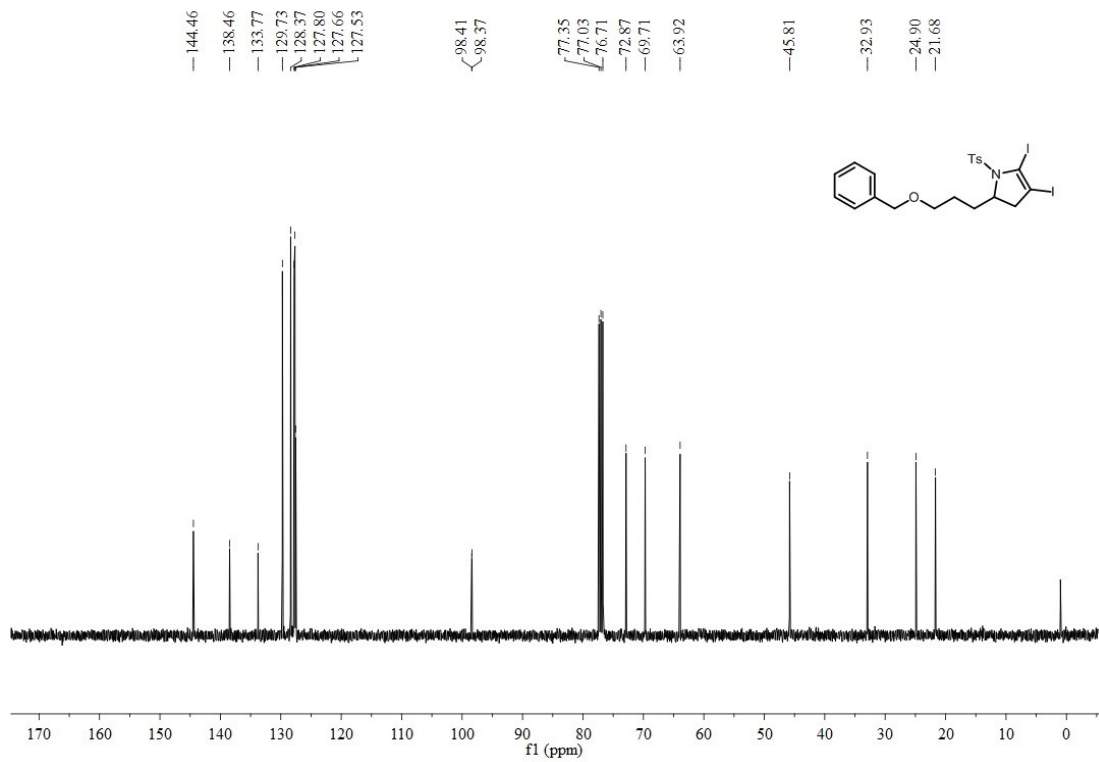



$^1\text{H}$ ,  $^{13}\text{C}$ -NMR spectra of **2n**

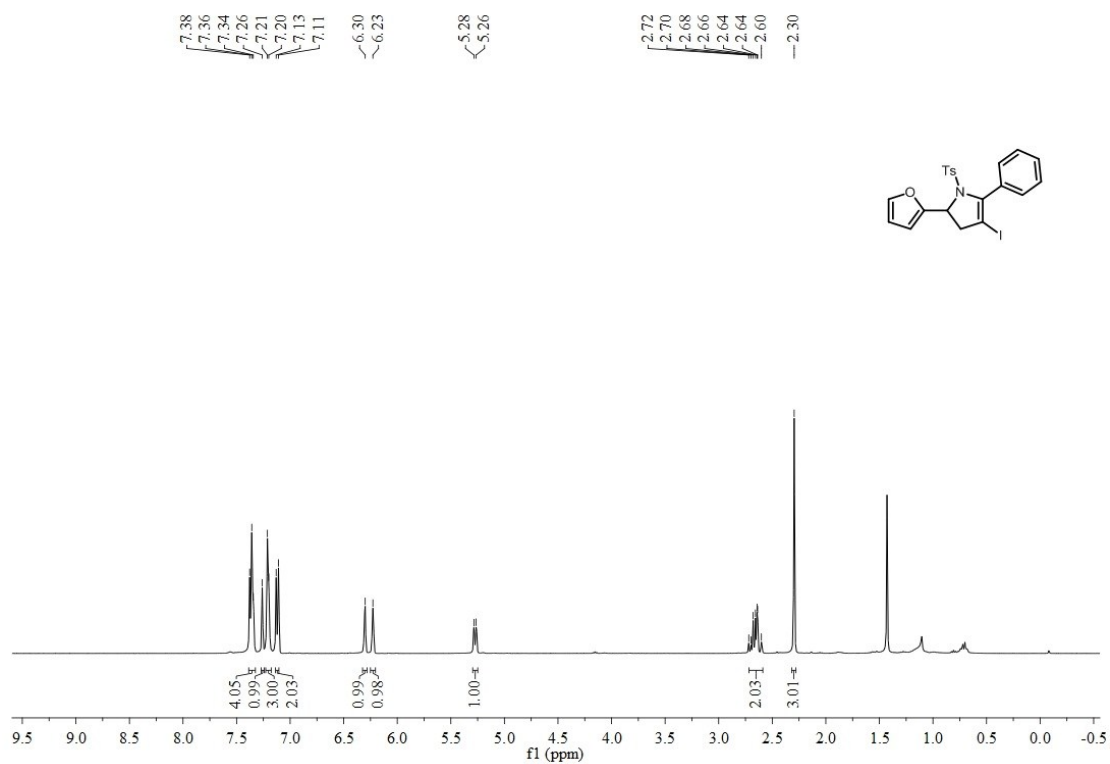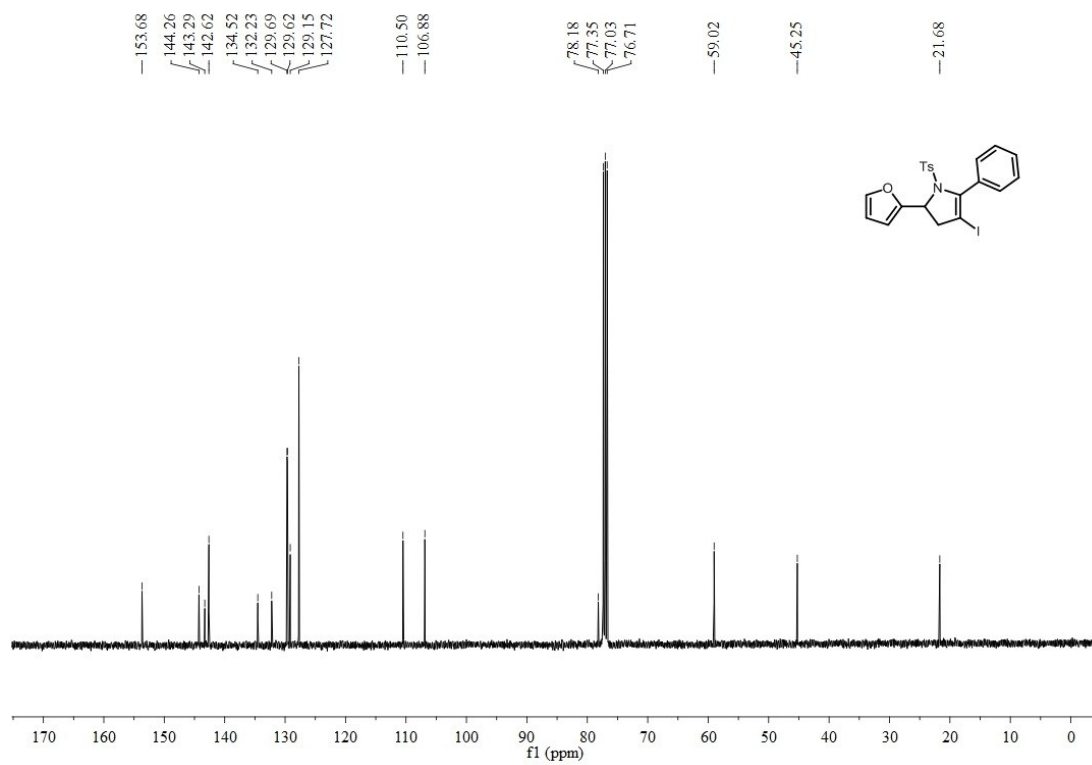

$^1\text{H}$ ,  $^{13}\text{C}$ -NMR spectra of **3a**

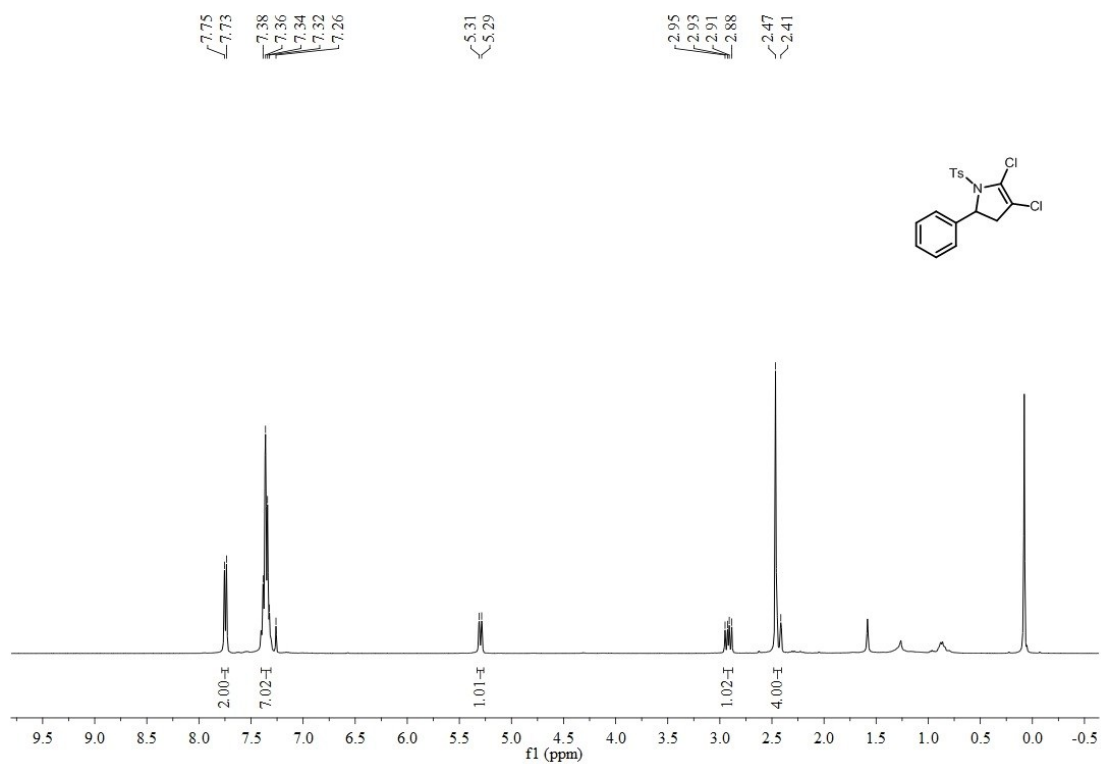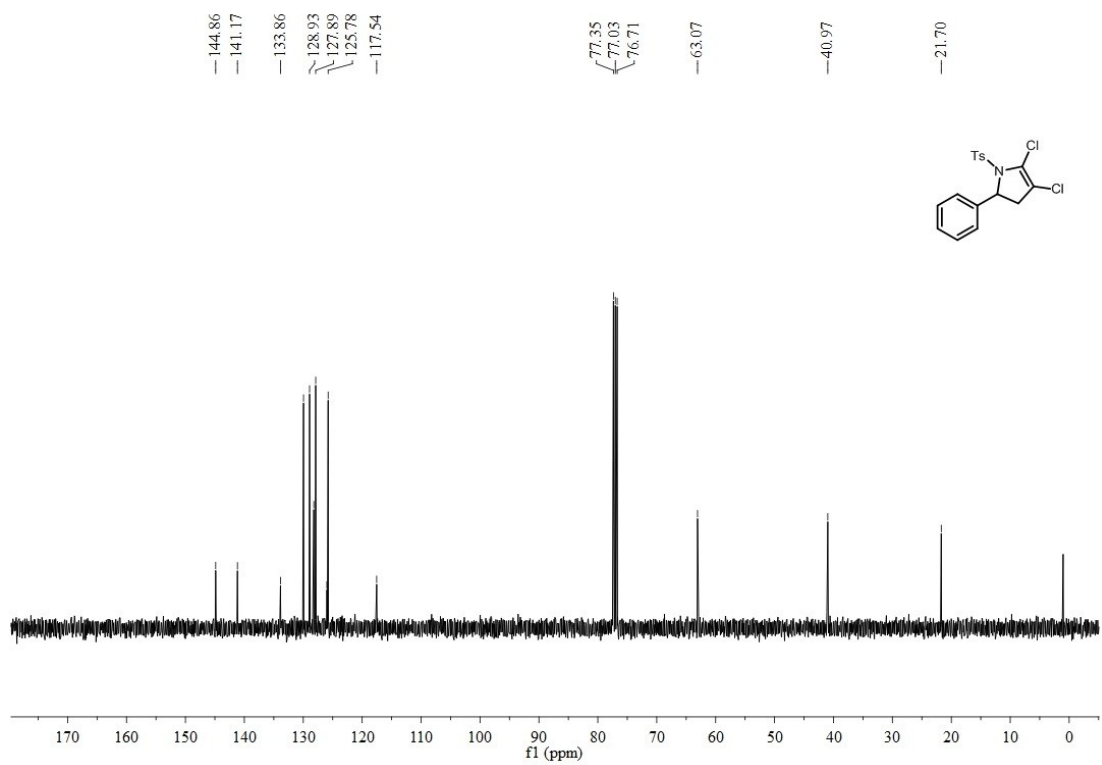

$^1\text{H}$ ,  $^{13}\text{C}$ -NMR spectra of **3b**

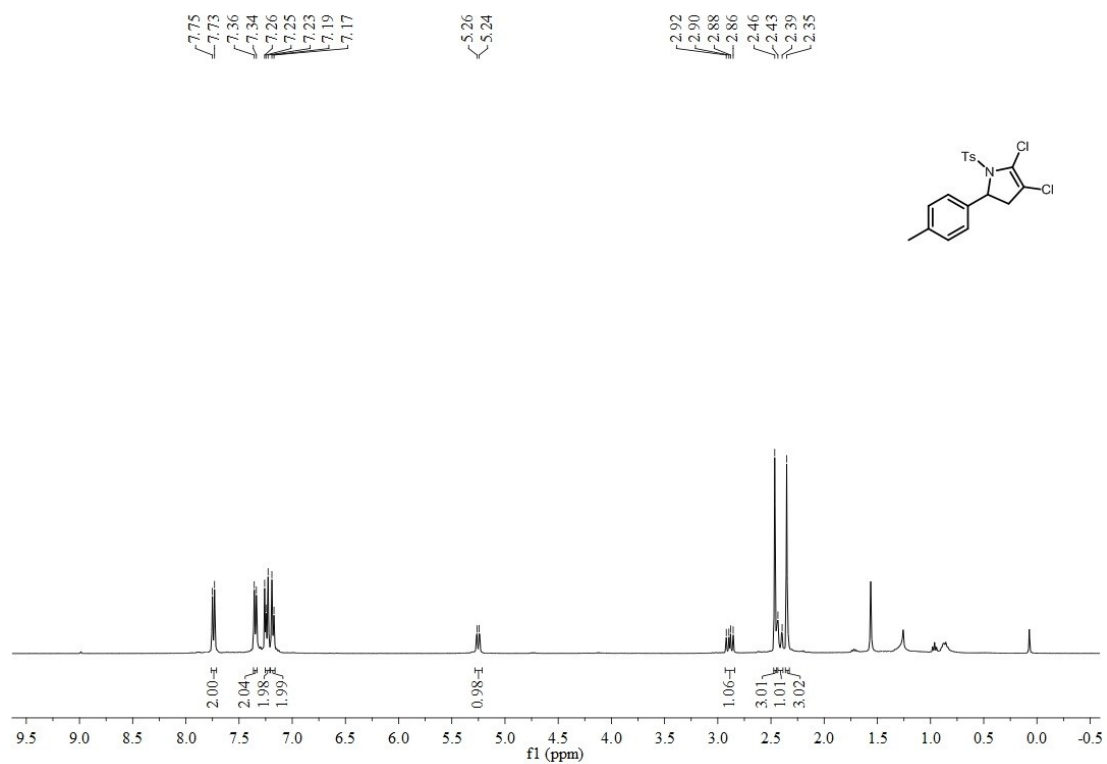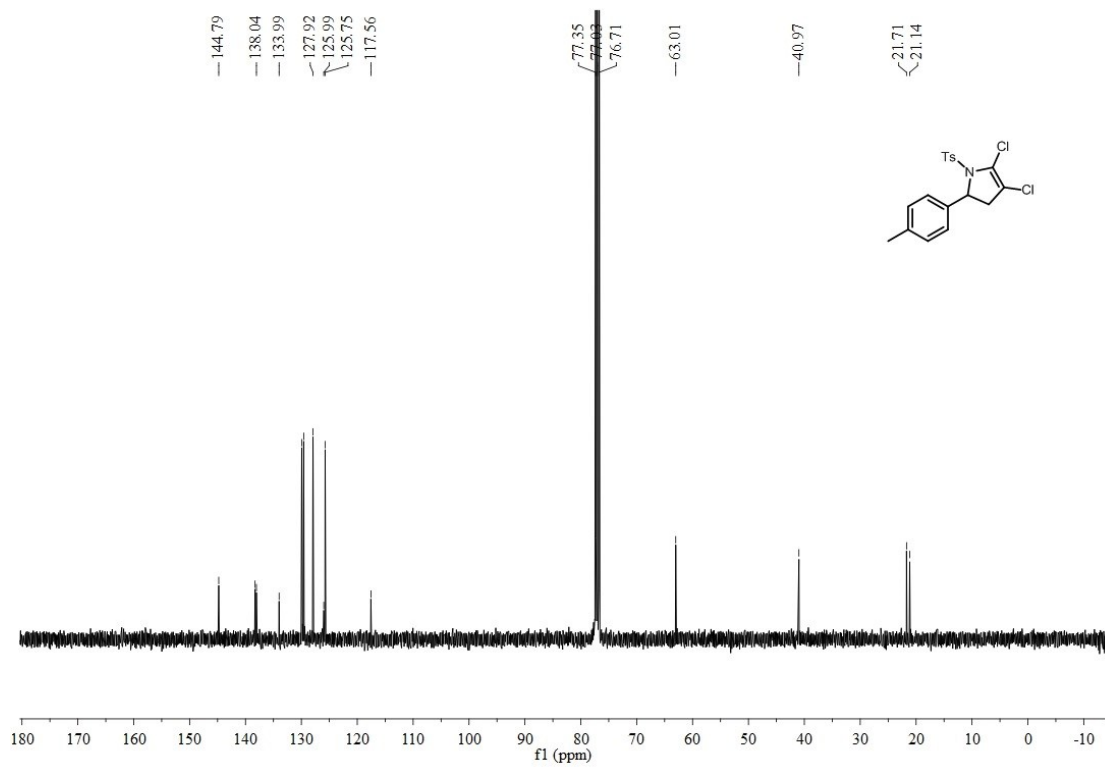

$^1\text{H}$ ,  $^{13}\text{C}$ -NMR spectra of **3c**

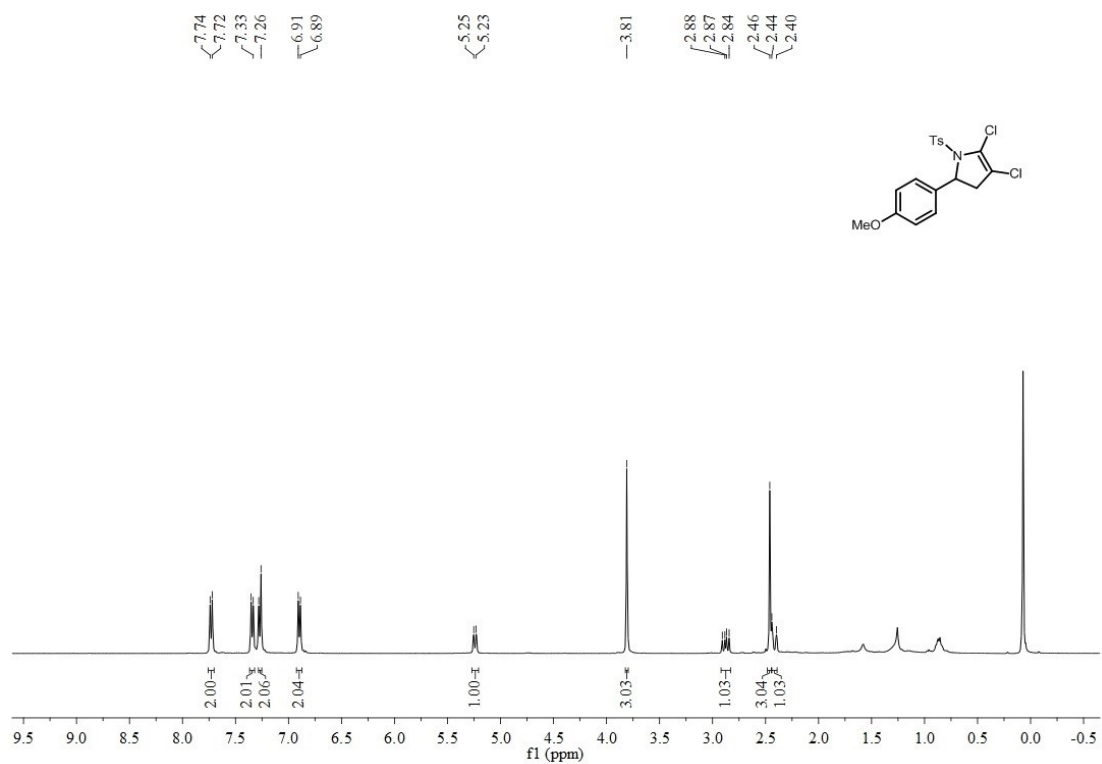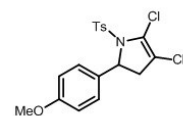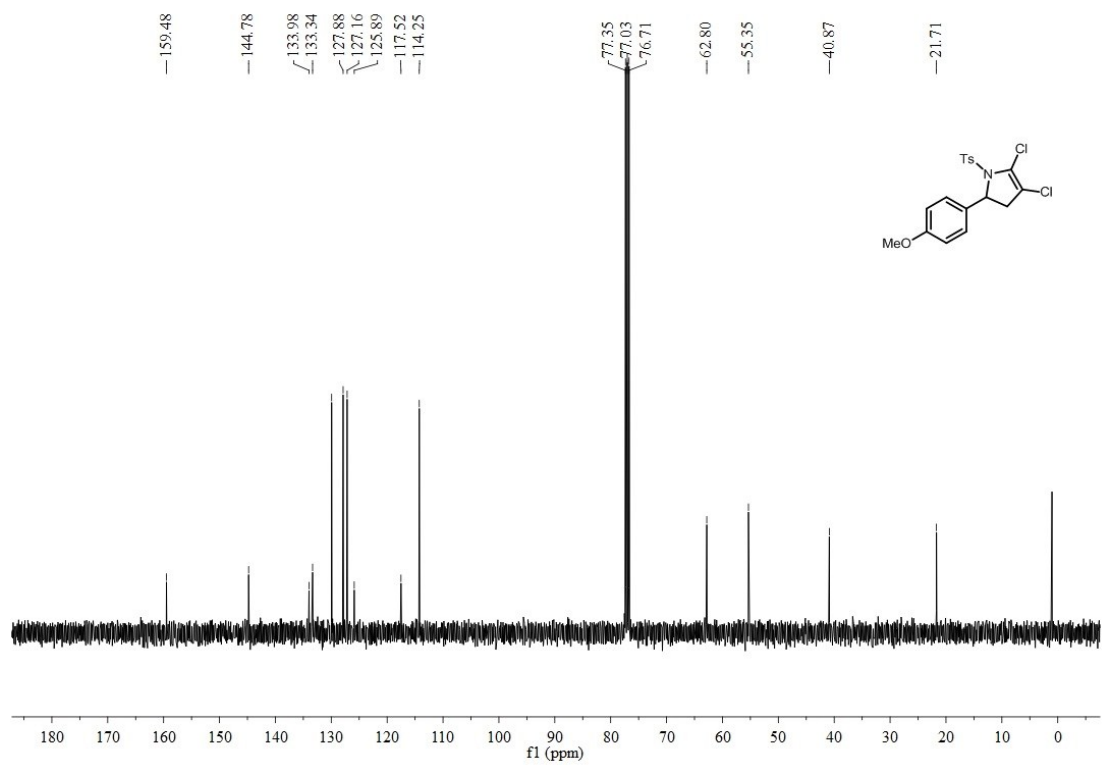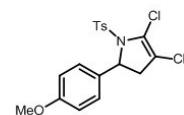

$^1\text{H}$ ,  $^{13}\text{C}$ -NMR spectra of **3d**

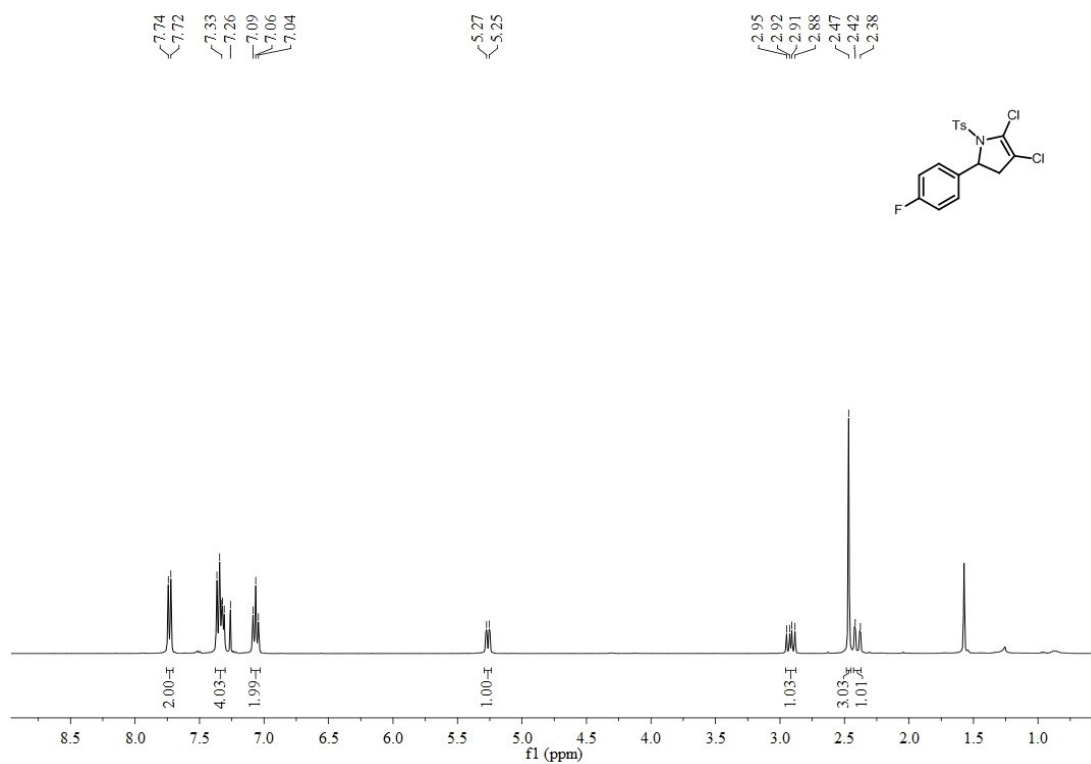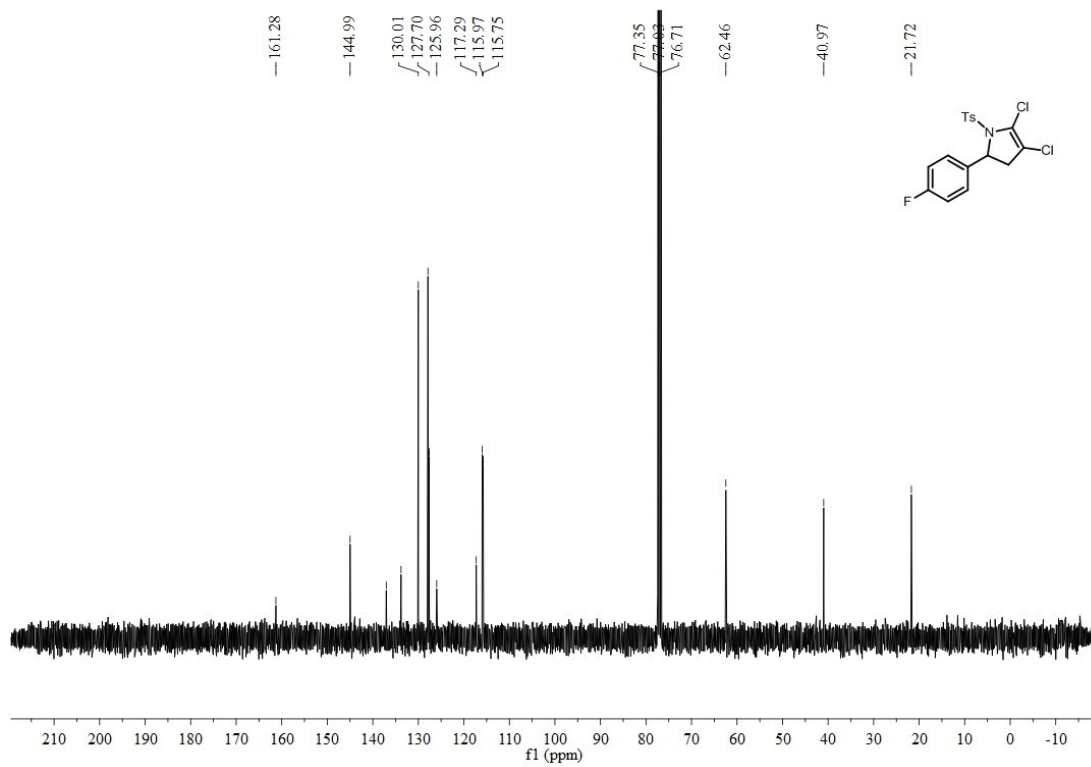

$^1\text{H}$ ,  $^{13}\text{C}$ -NMR spectra of **3e**

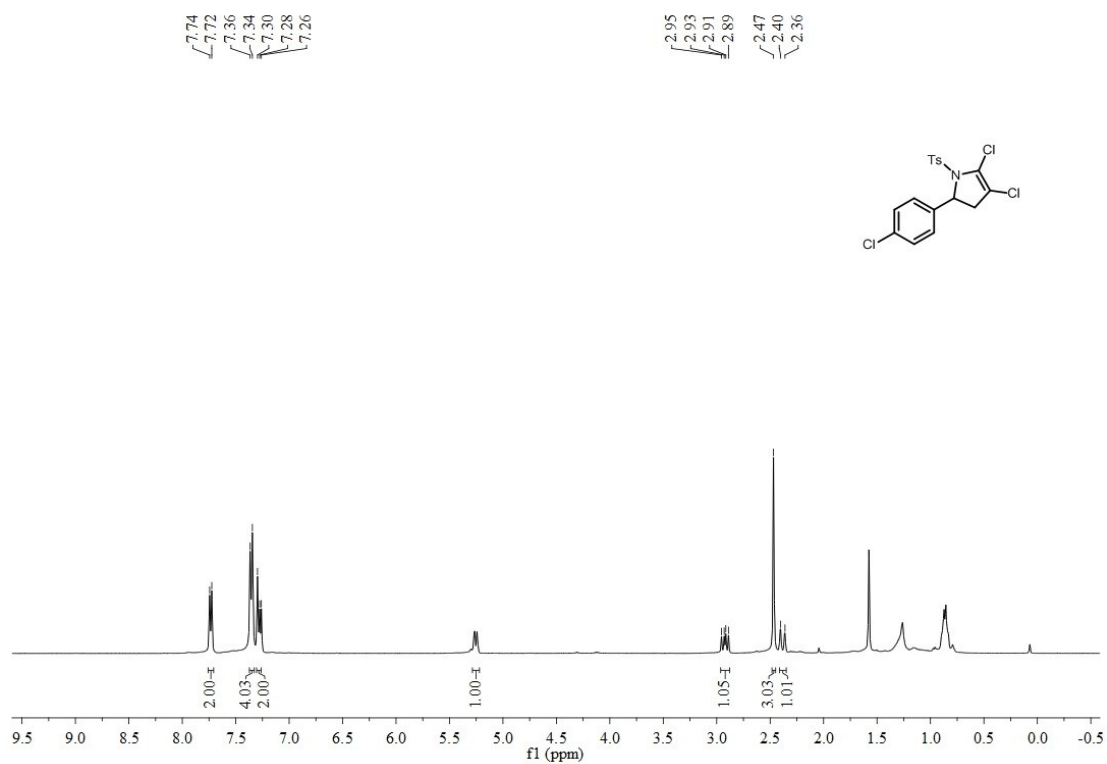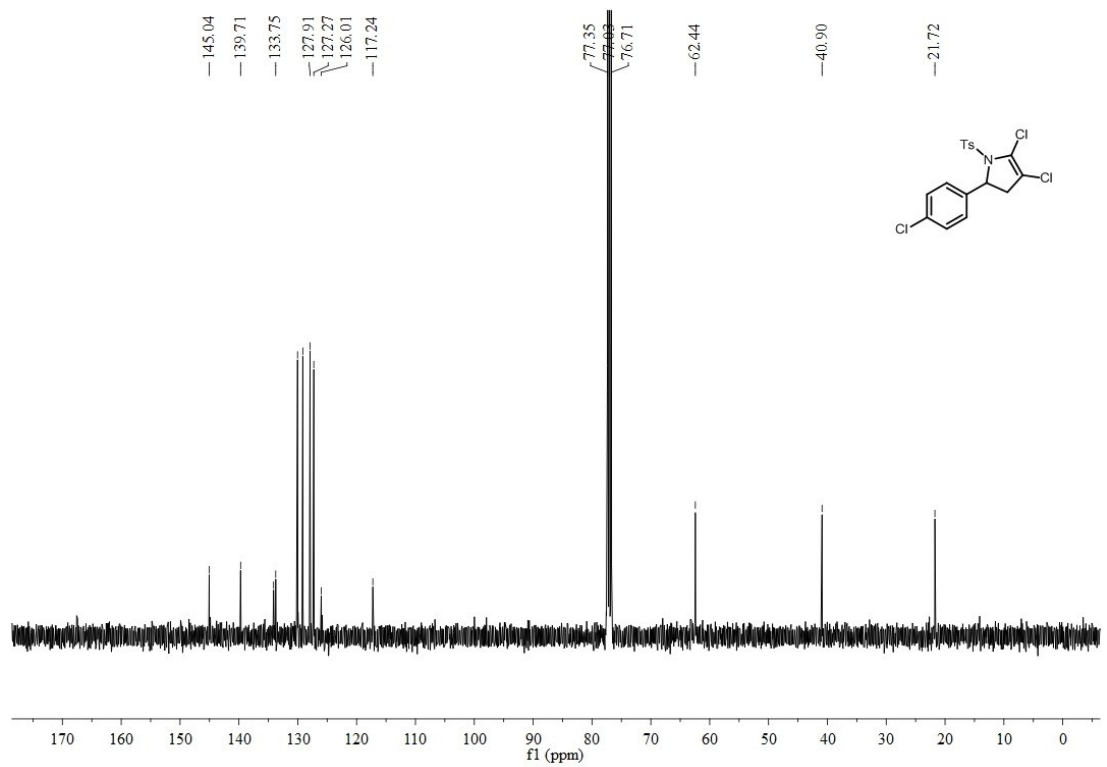

$^1\text{H}$ ,  $^{13}\text{C}$ -NMR spectra of **3f**

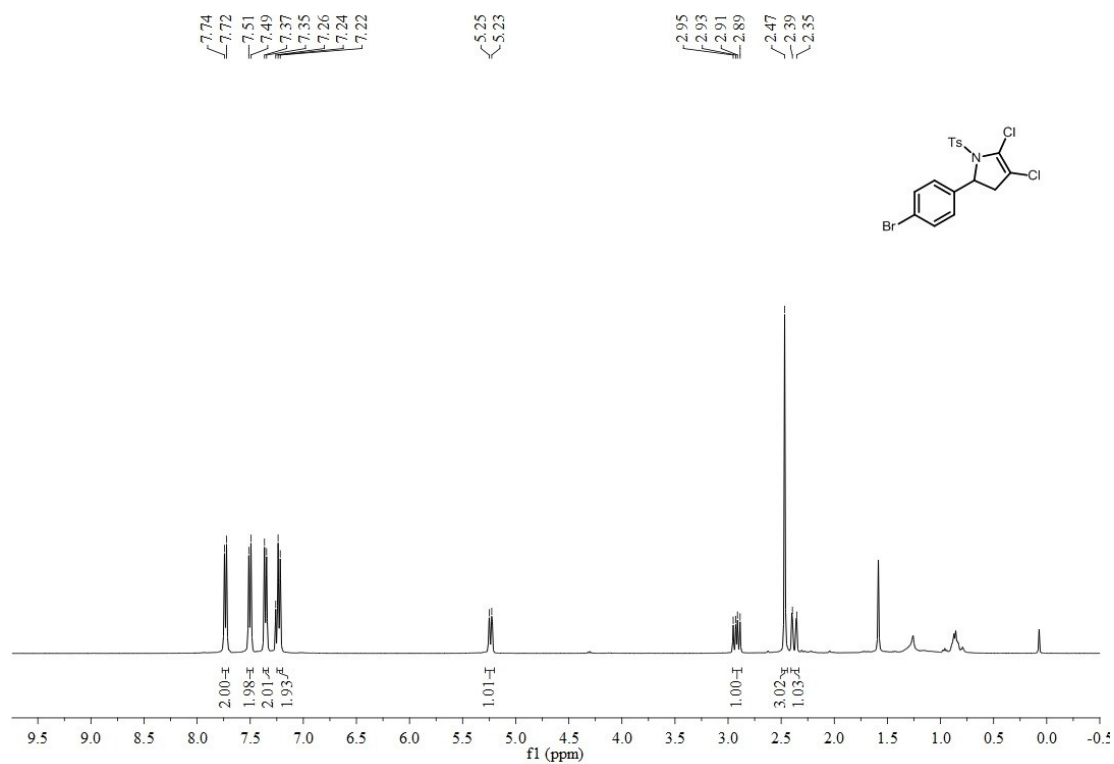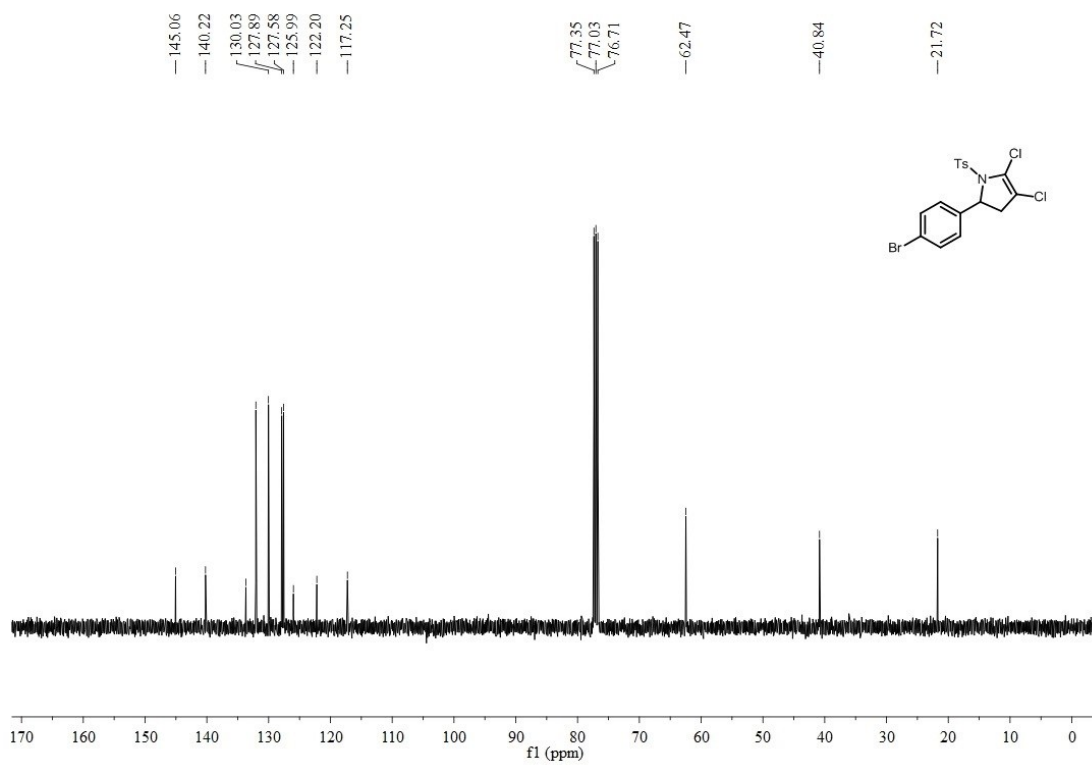

$^1\text{H}$ ,  $^{13}\text{C}$ -NMR spectra of **3g**

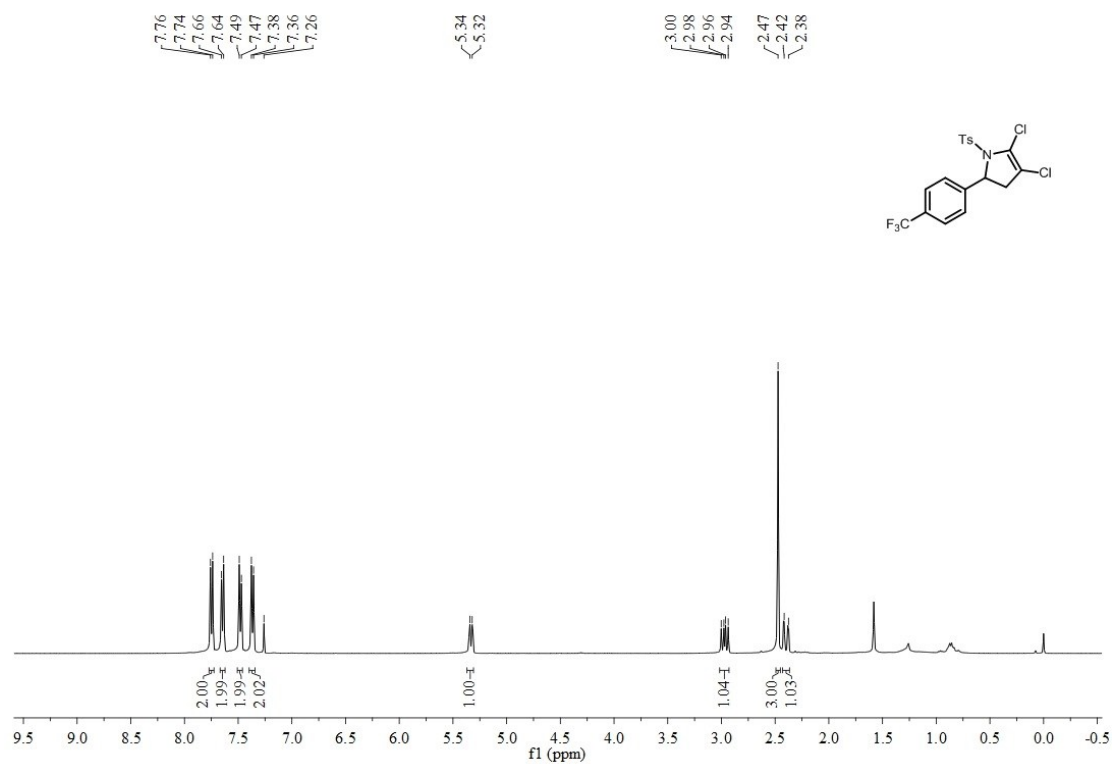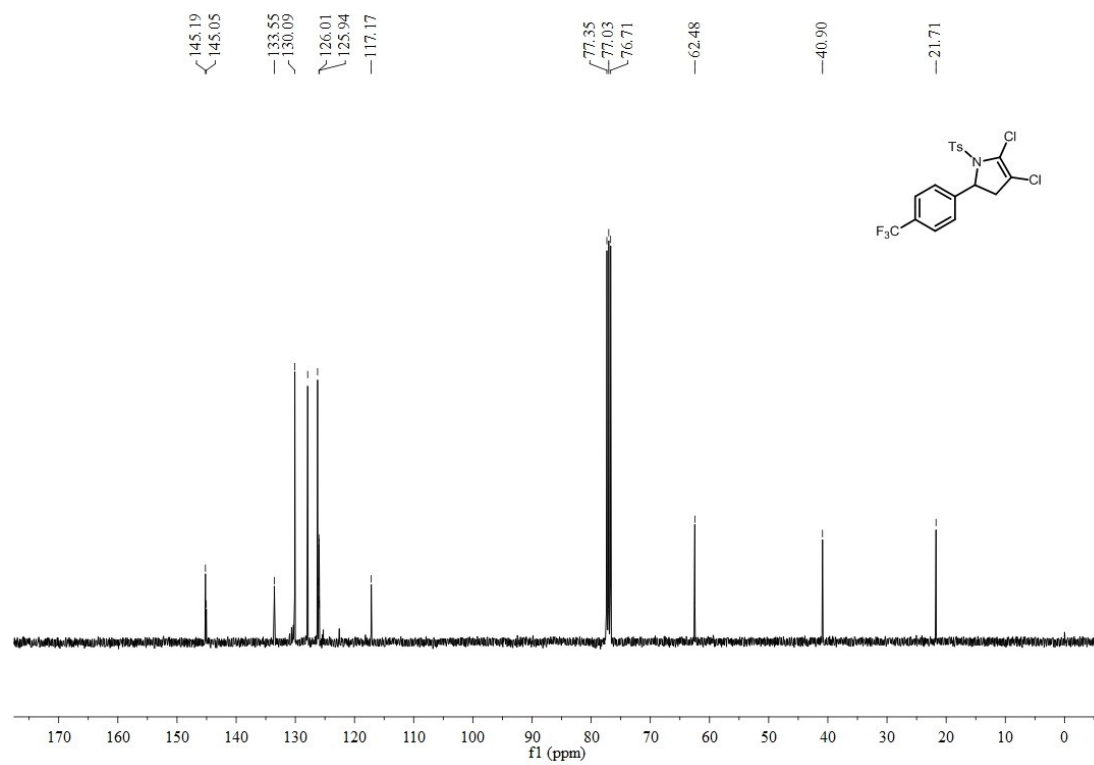



$^1\text{H}$ ,  $^{13}\text{C}$ -NMR spectra of **3h**

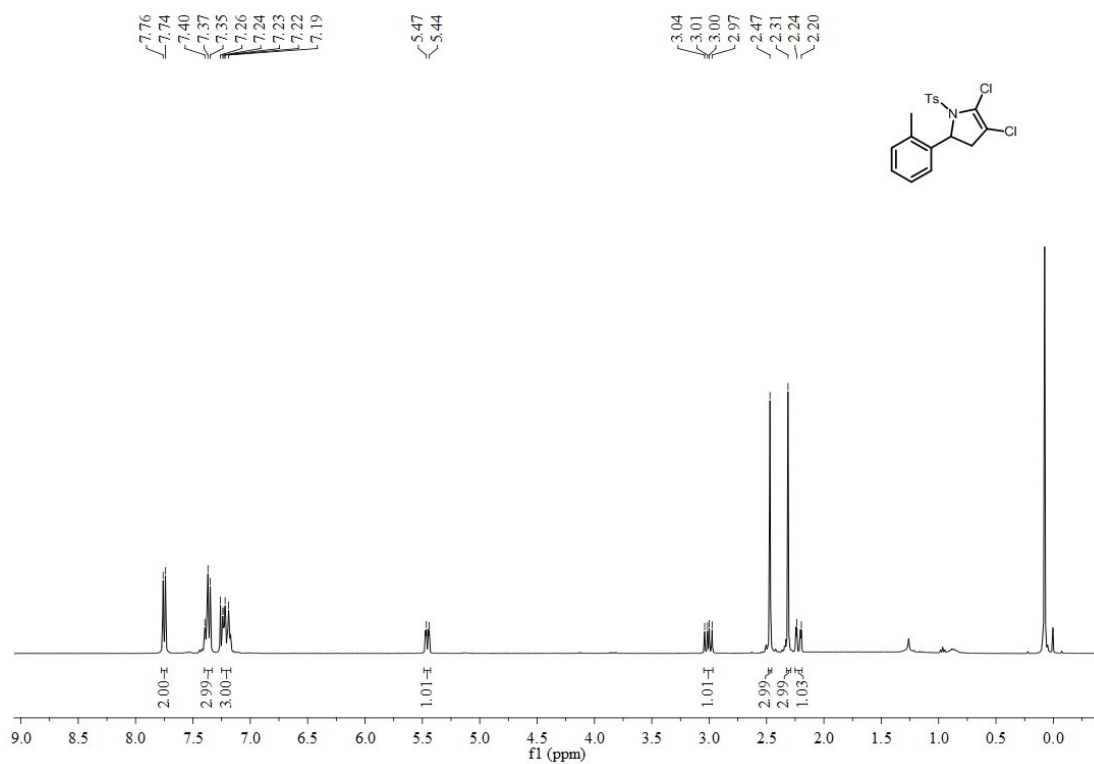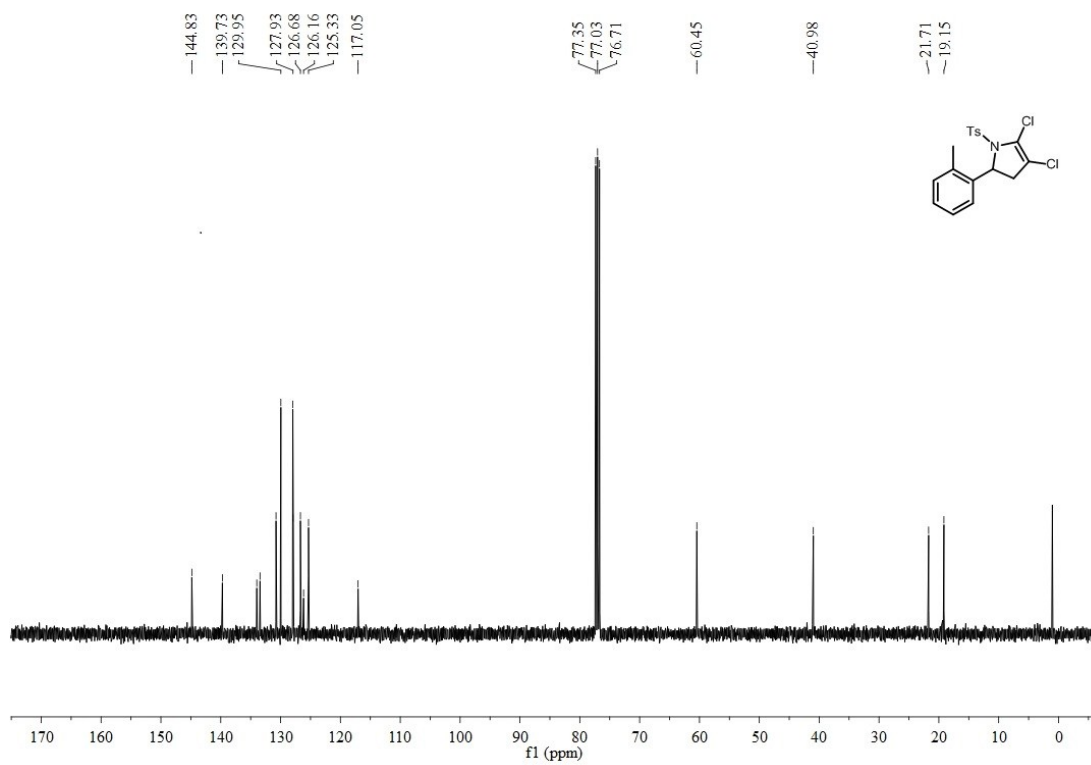

$^1\text{H}$ ,  $^{13}\text{C}$ -NMR spectra of **3i**

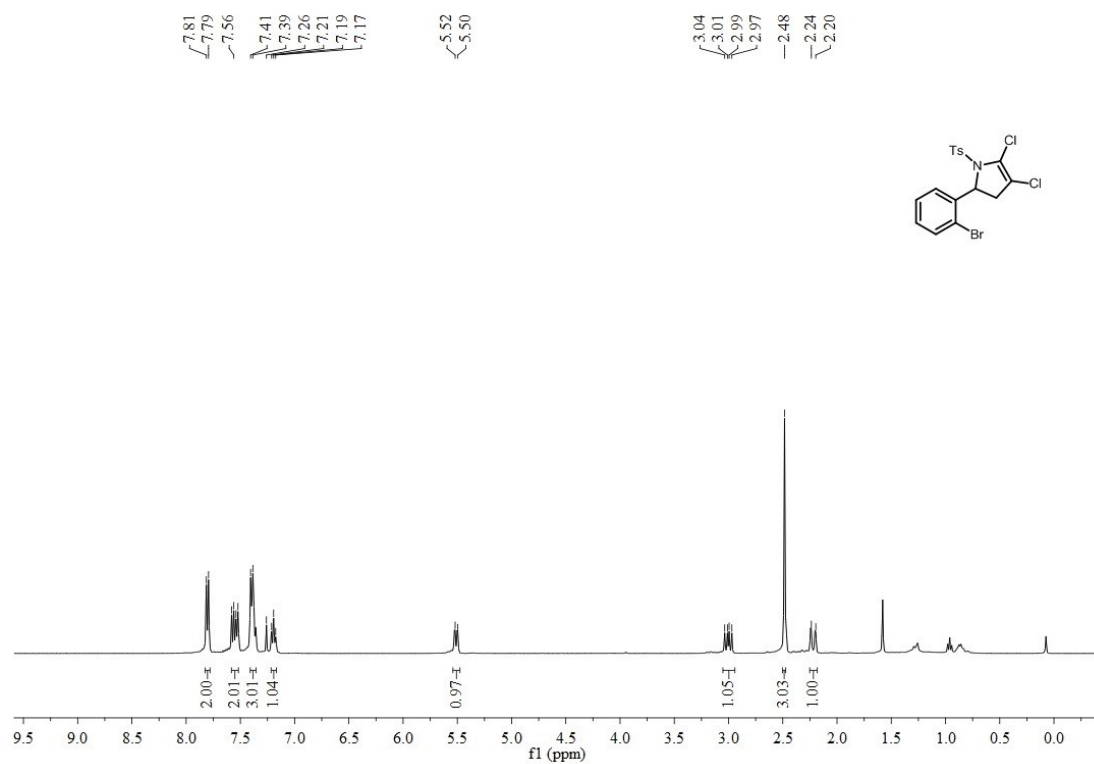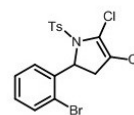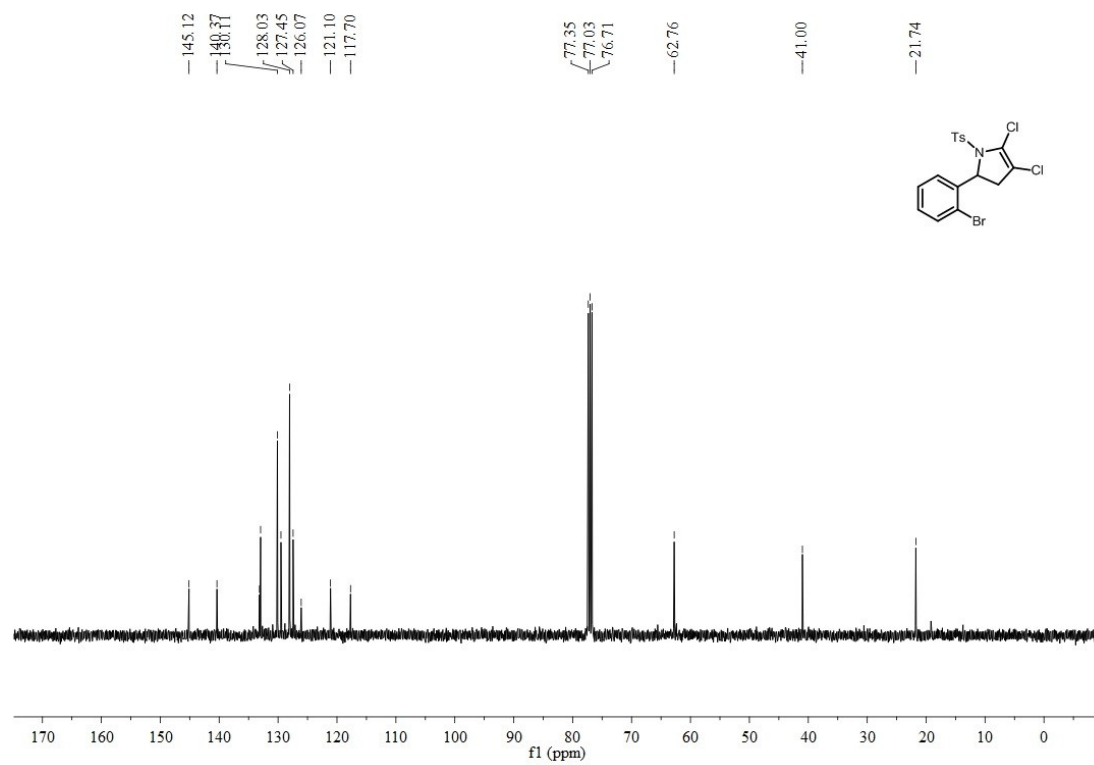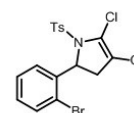

$^1\text{H}$ ,  $^{13}\text{C}$ -NMR spectra of **3j**

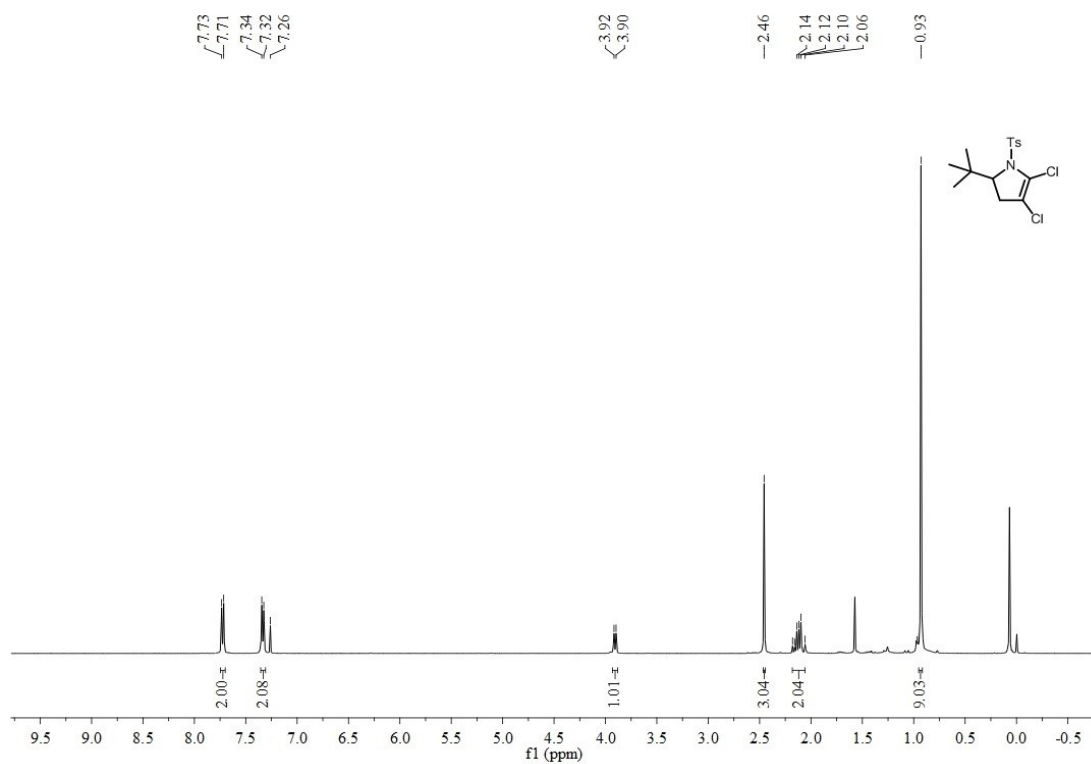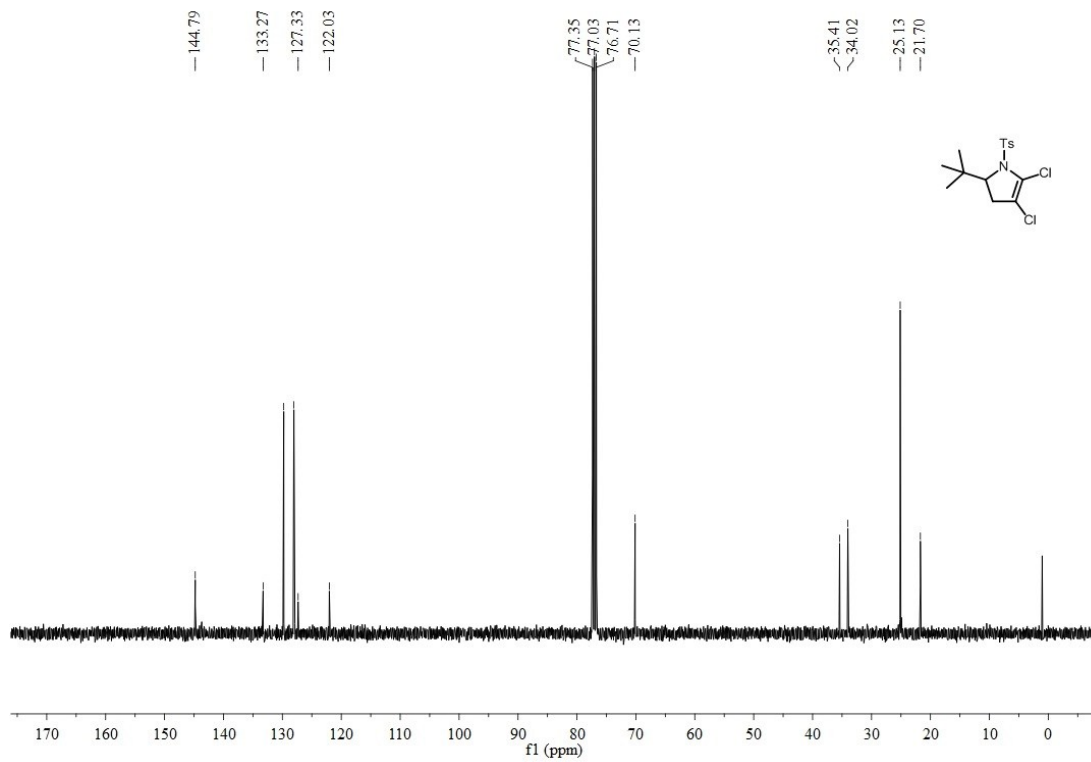

$^1\text{H}$ ,  $^{13}\text{C}$ -NMR spectra of **3k**

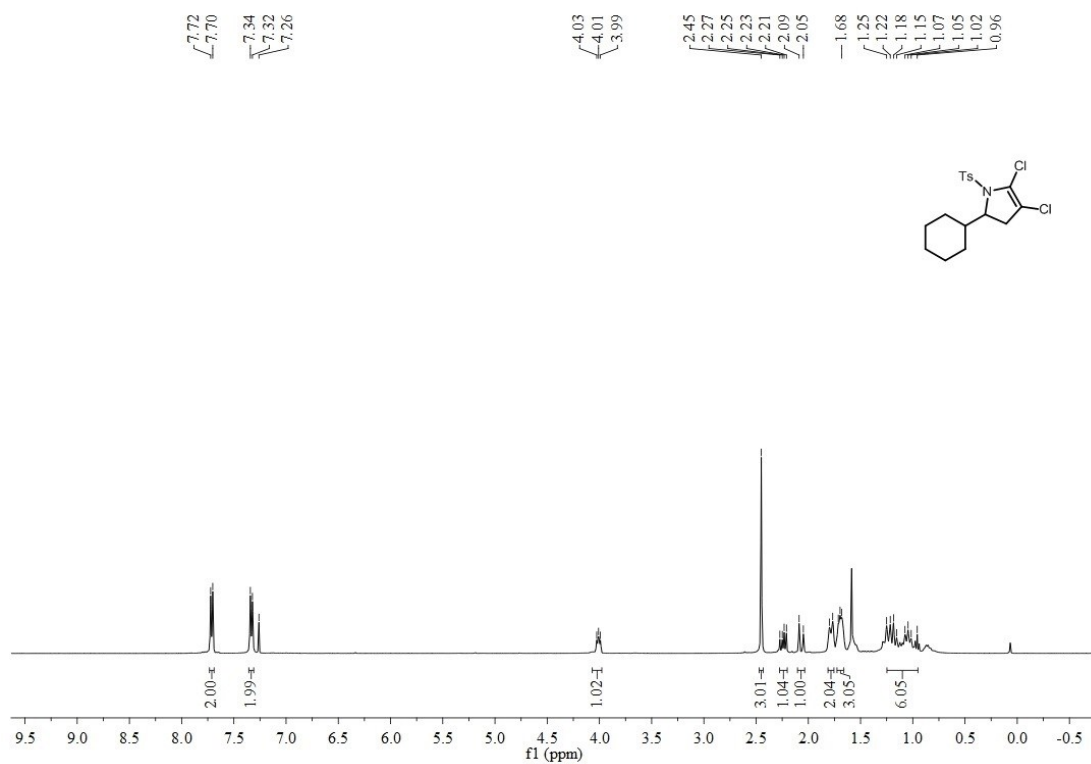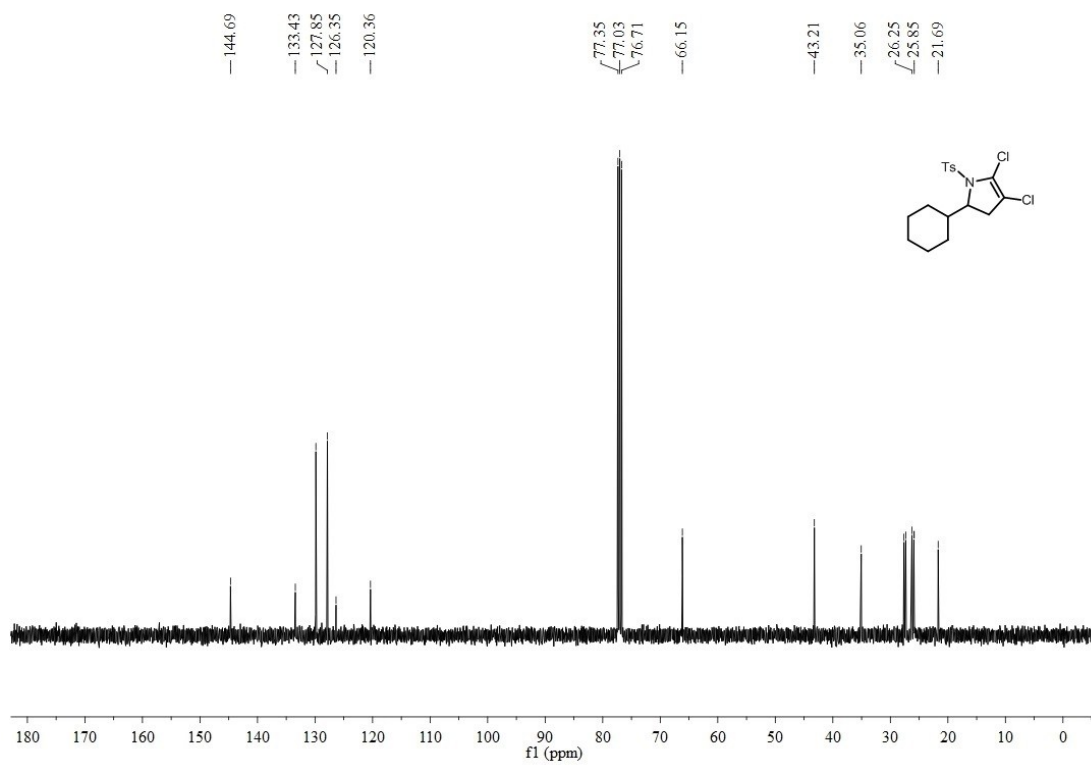

$^1\text{H}$ ,  $^{13}\text{C}$ -NMR spectra of **31**

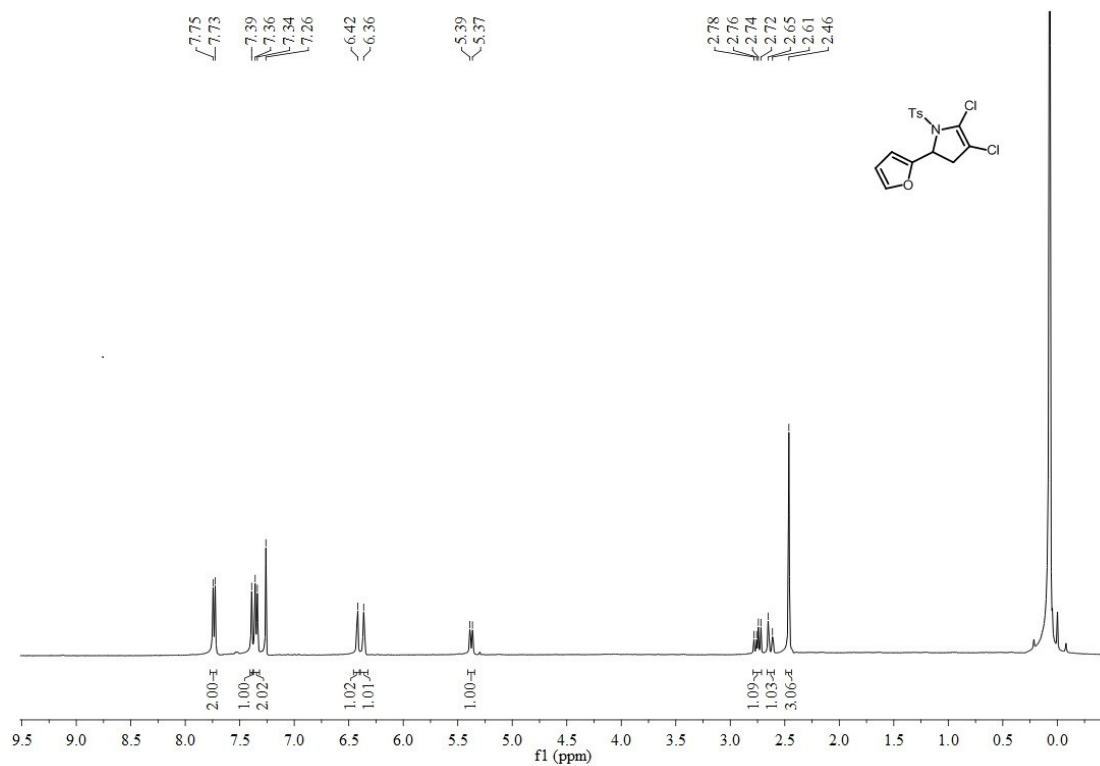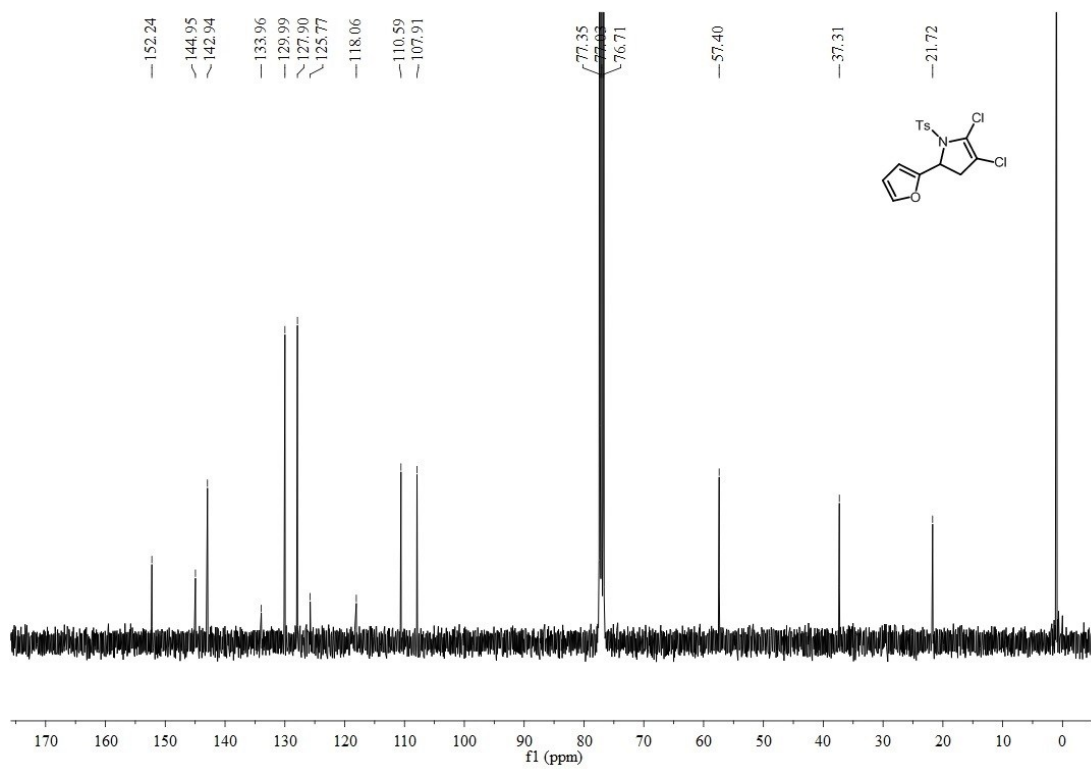

$^1\text{H}$ ,  $^{13}\text{C}$ -NMR spectra of **3m**

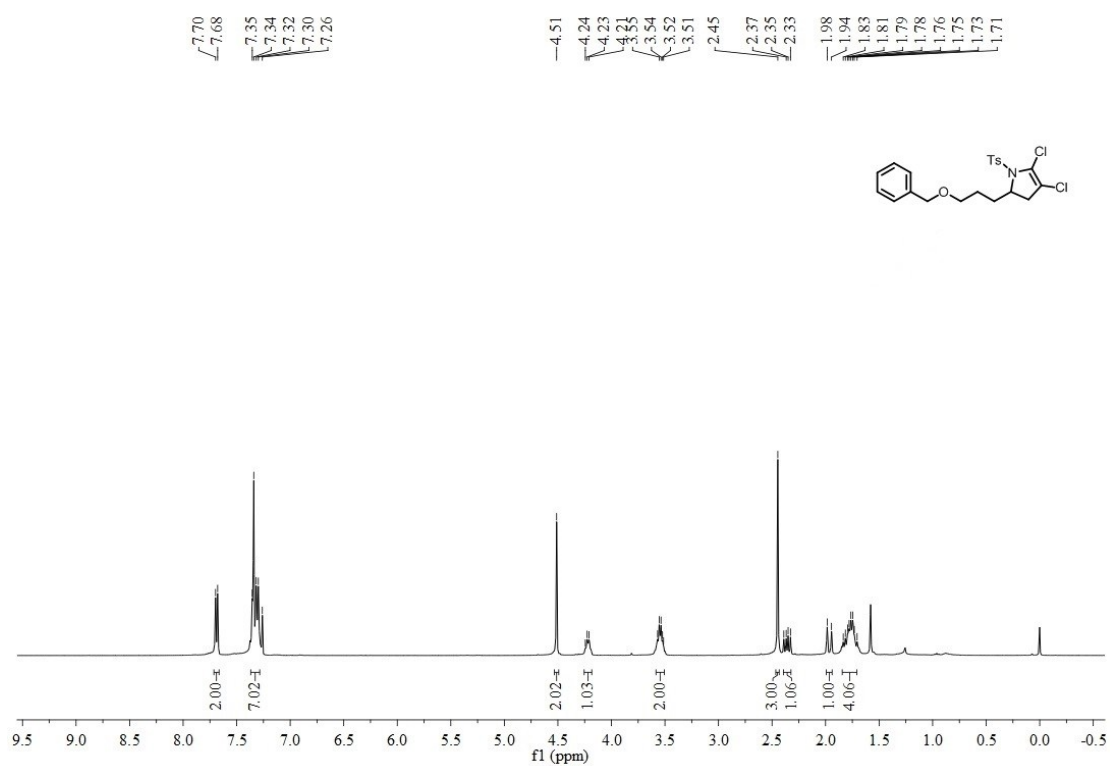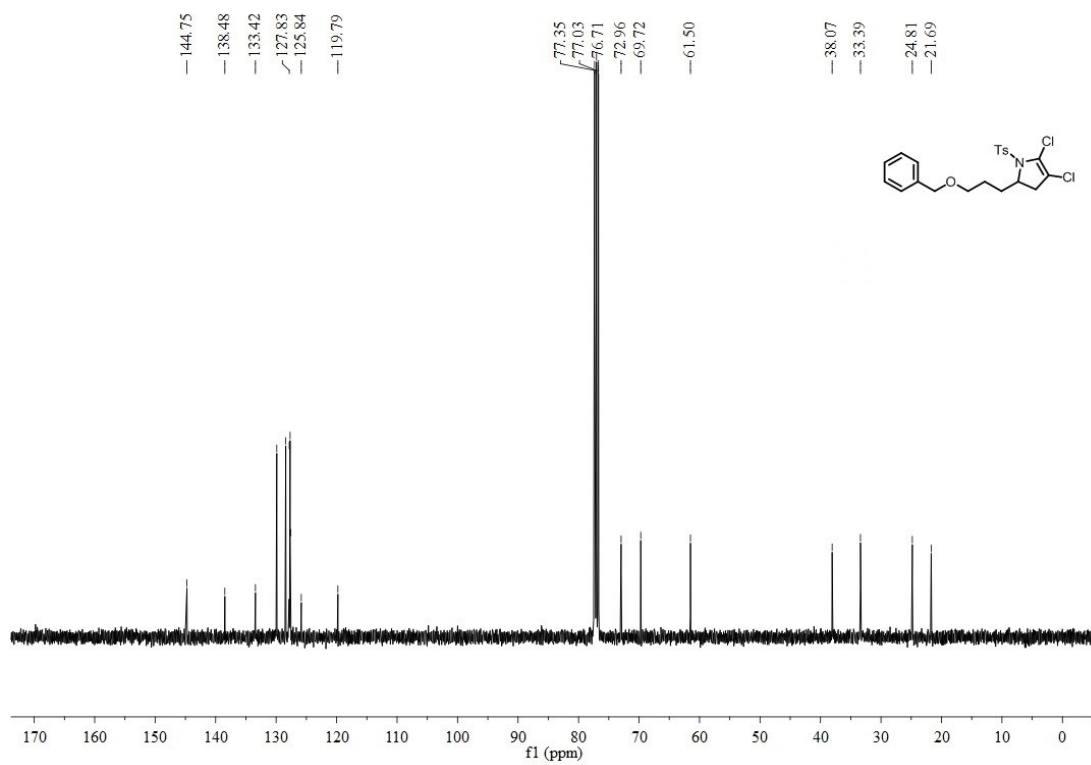

$^1\text{H}$ ,  $^{13}\text{C}$ -NMR spectra of **4a**

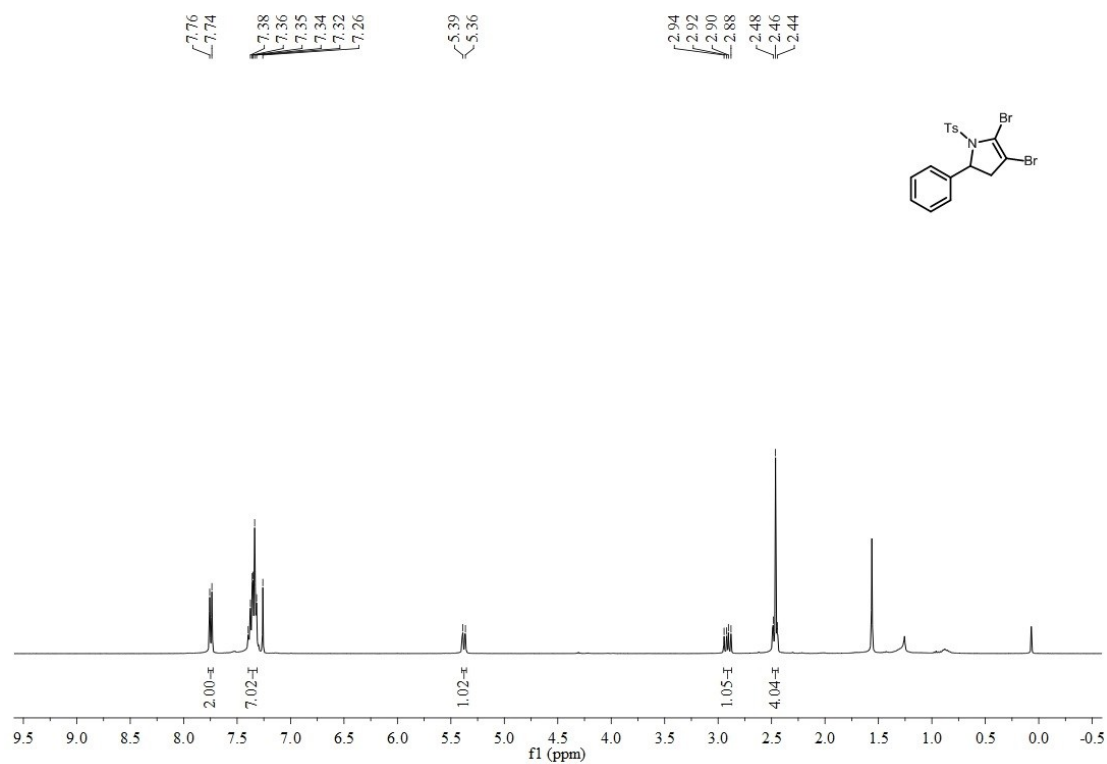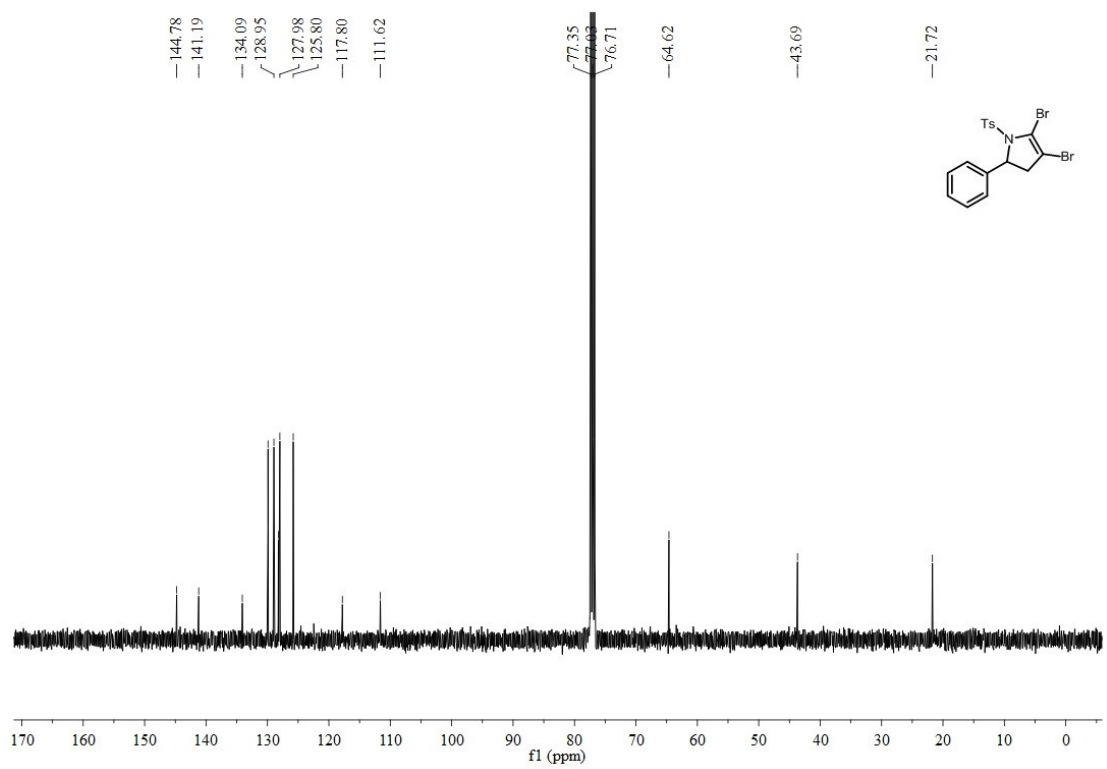

$^1\text{H}$ ,  $^{13}\text{C}$ -NMR spectra of **4b**

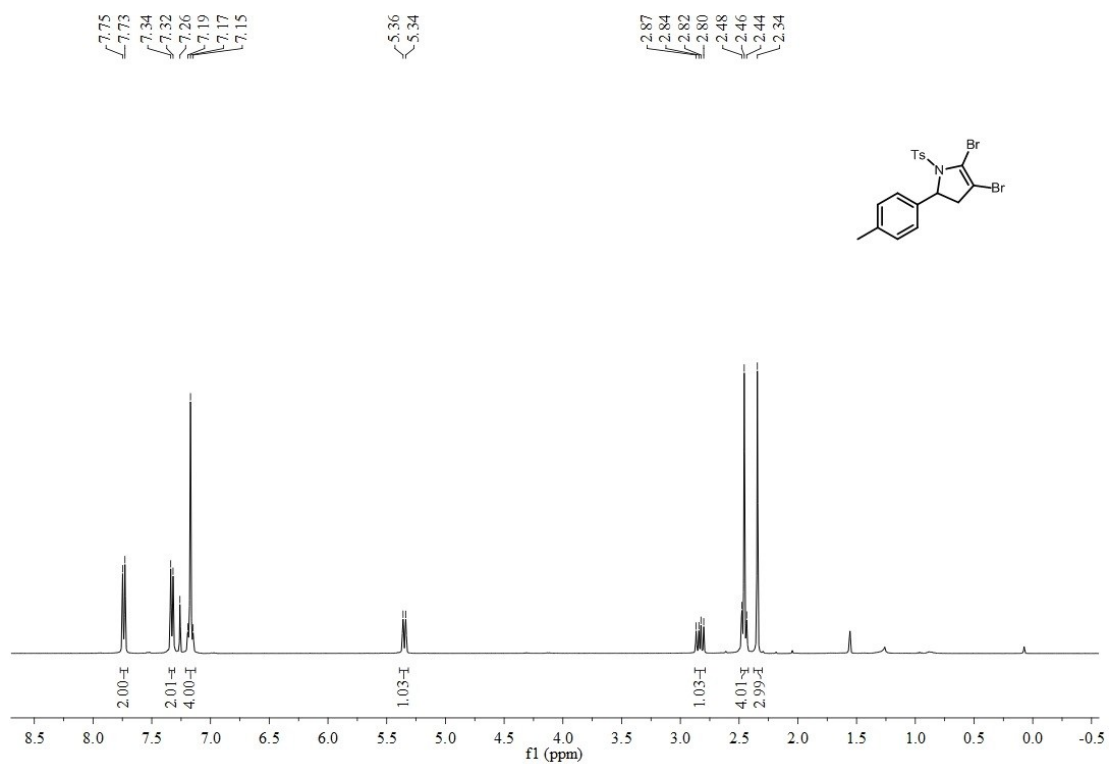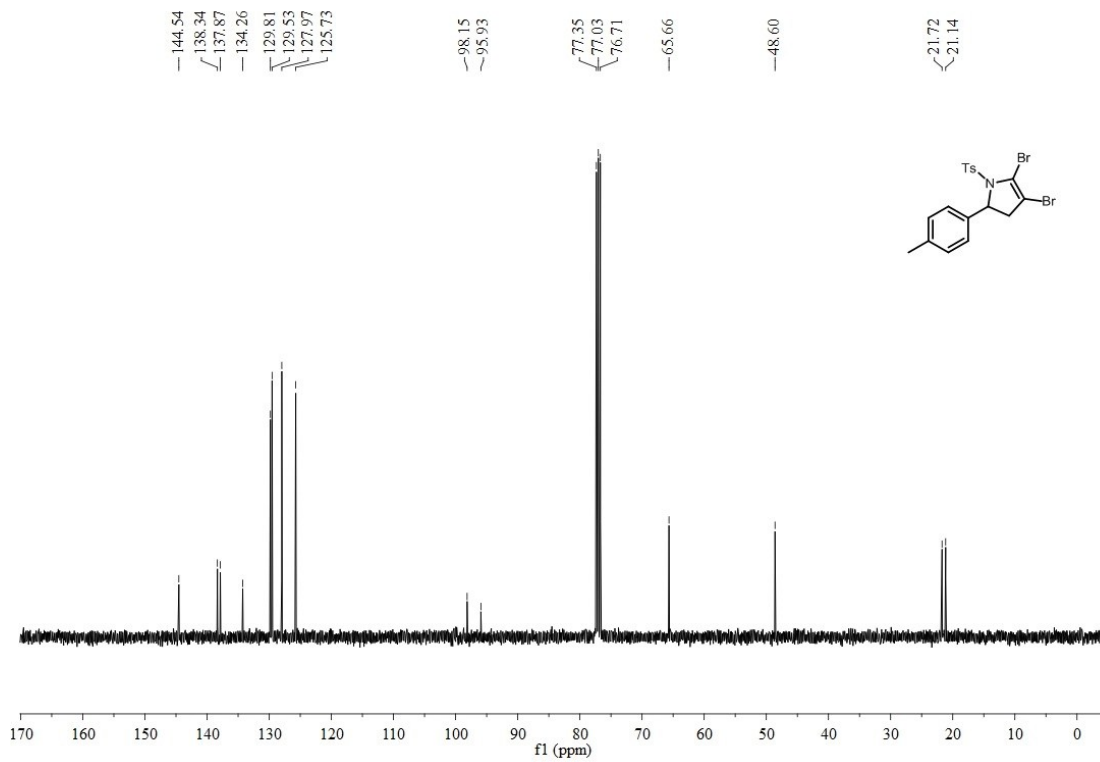



$^1\text{H}$ ,  $^{13}\text{C}$ -NMR spectra of **4c**

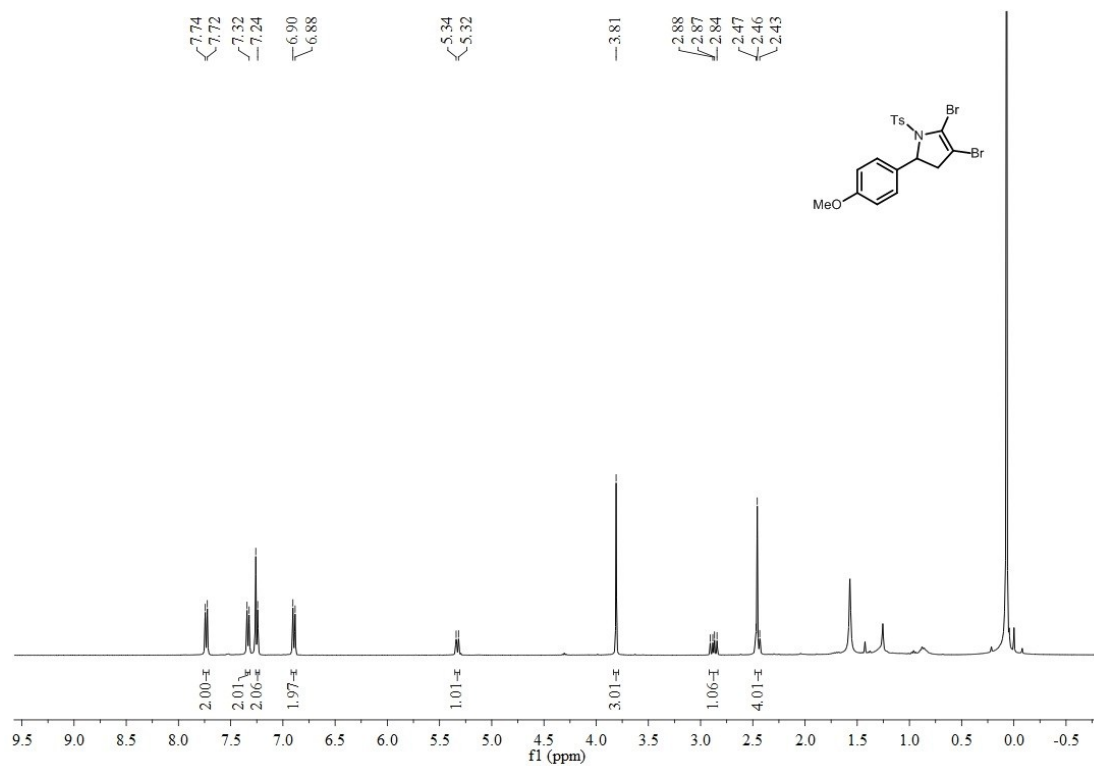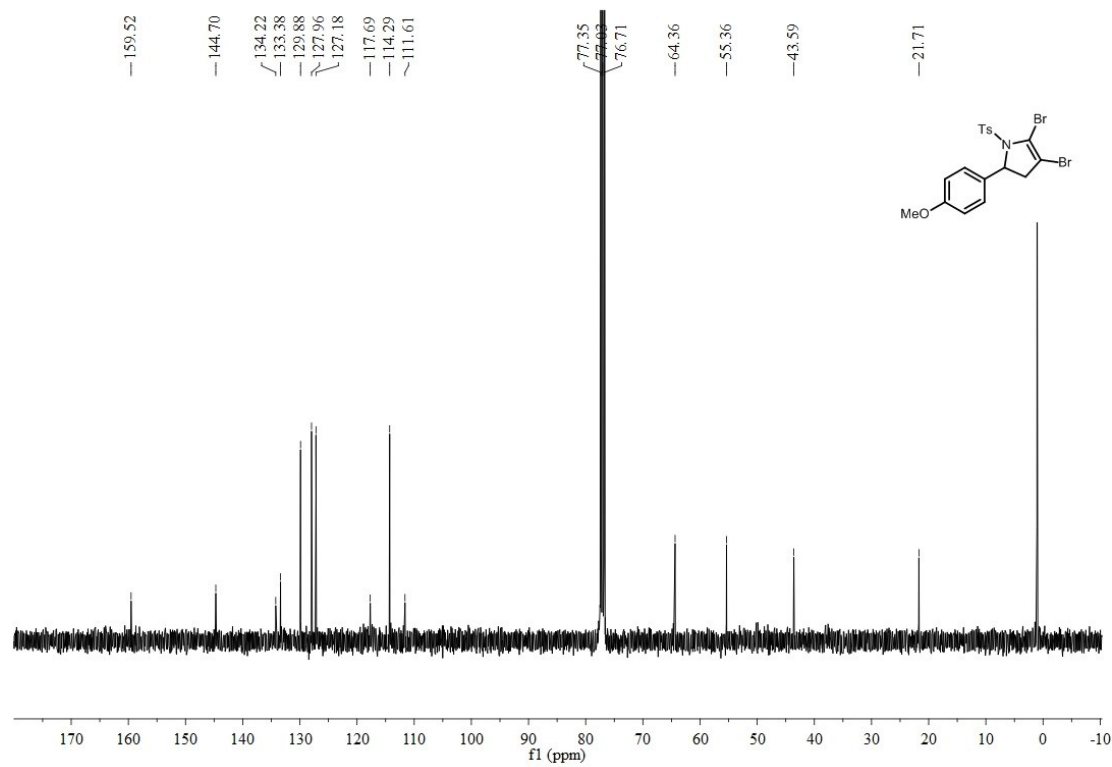

$^1\text{H}$ ,  $^{13}\text{C}$ -NMR spectra of **4d**

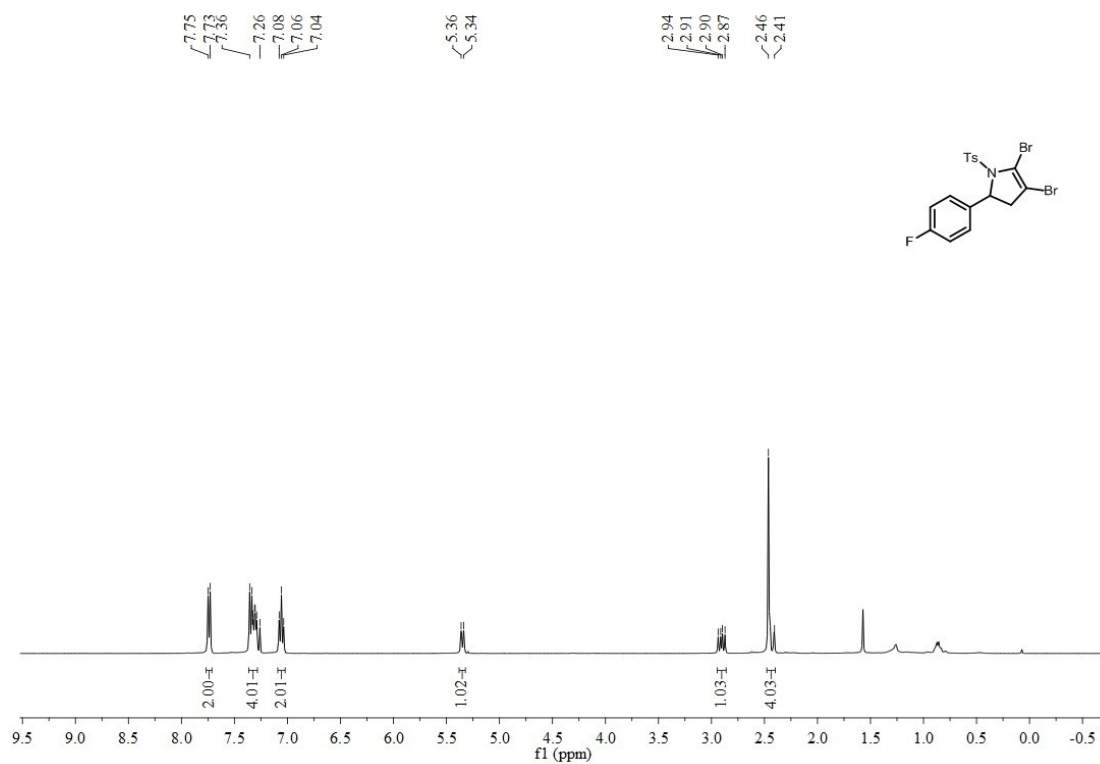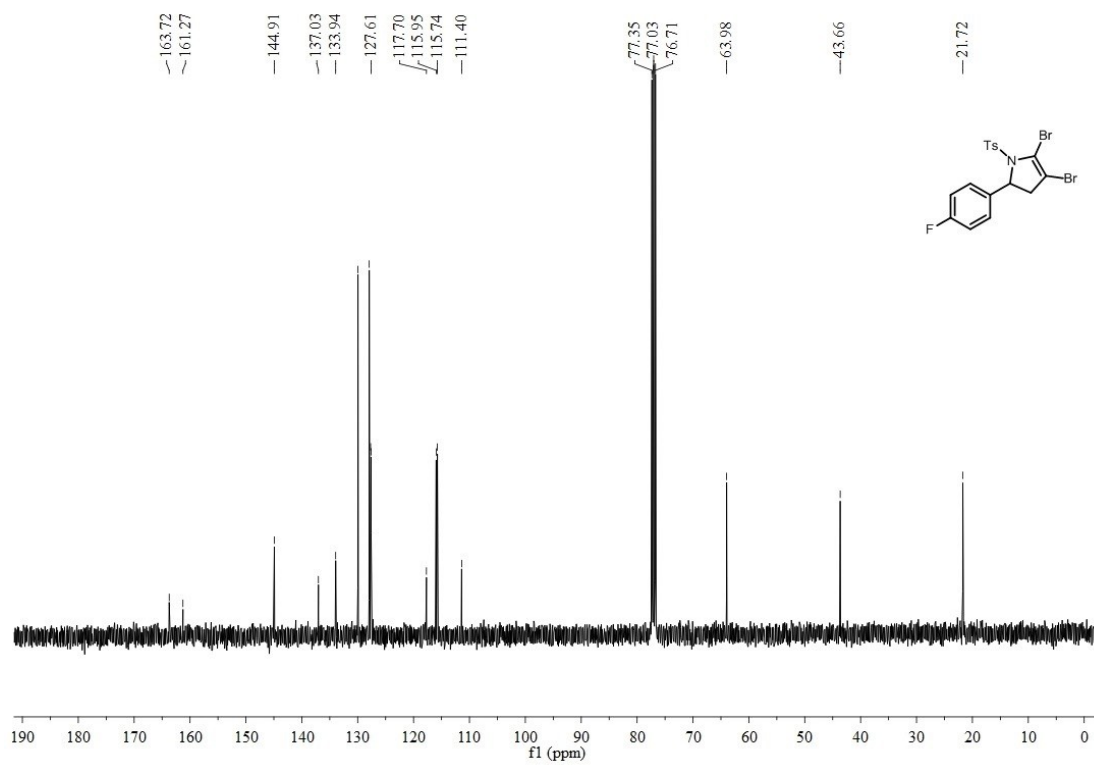

$^1\text{H}$ ,  $^{13}\text{C}$ -NMR spectra of **4e**

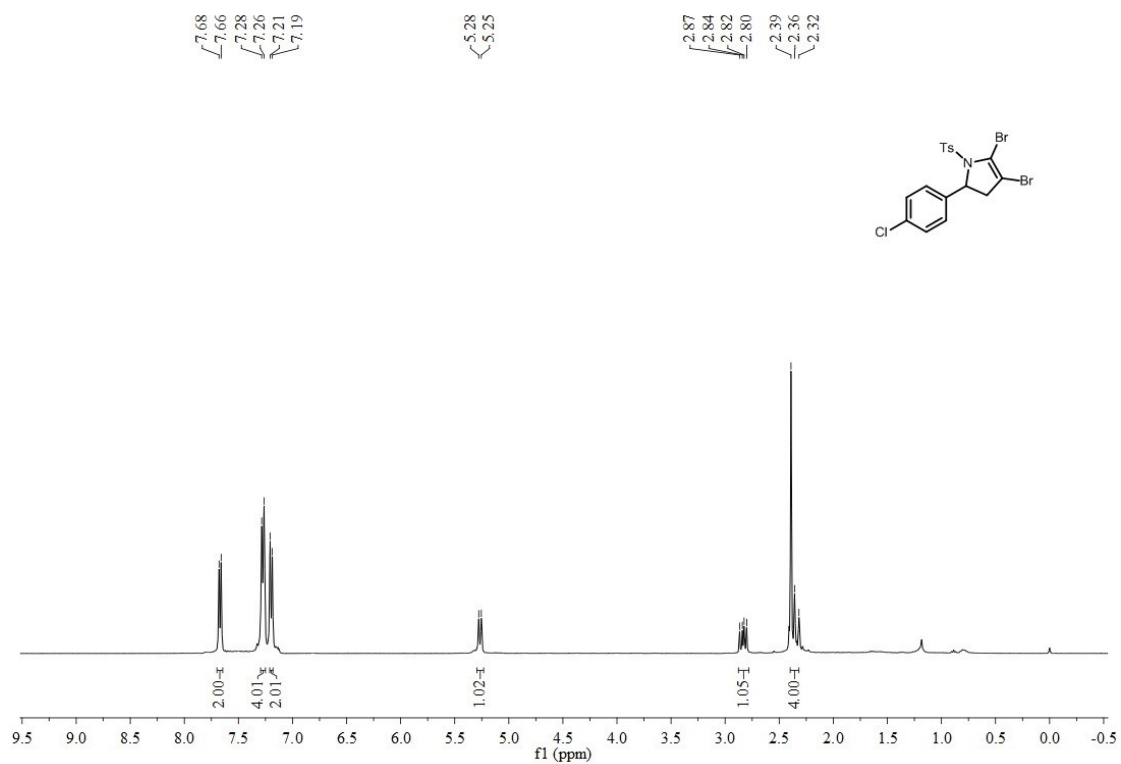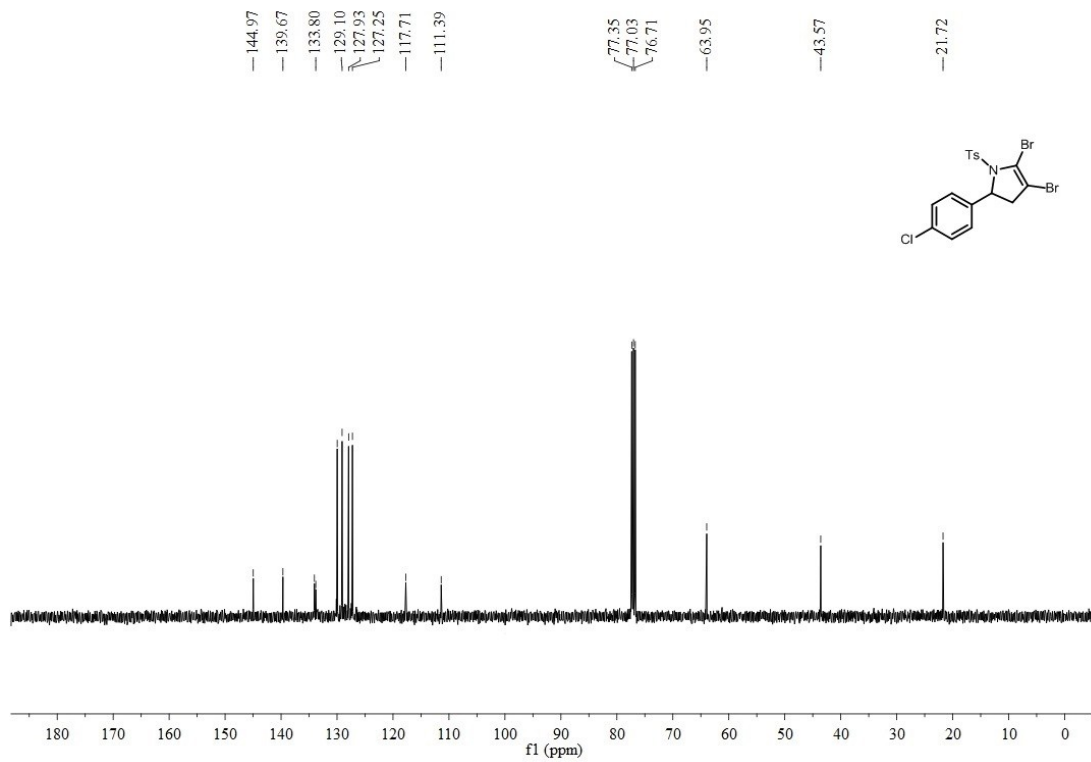

$^1\text{H}$ ,  $^{13}\text{C}$ -NMR spectra of **4f**

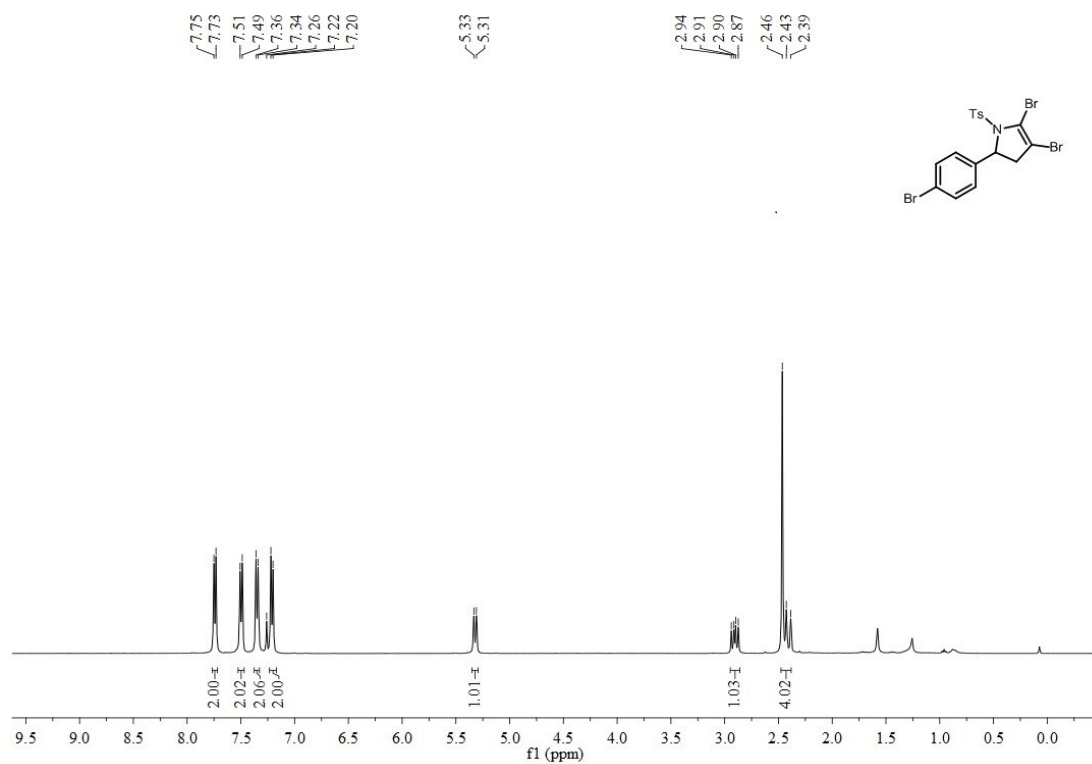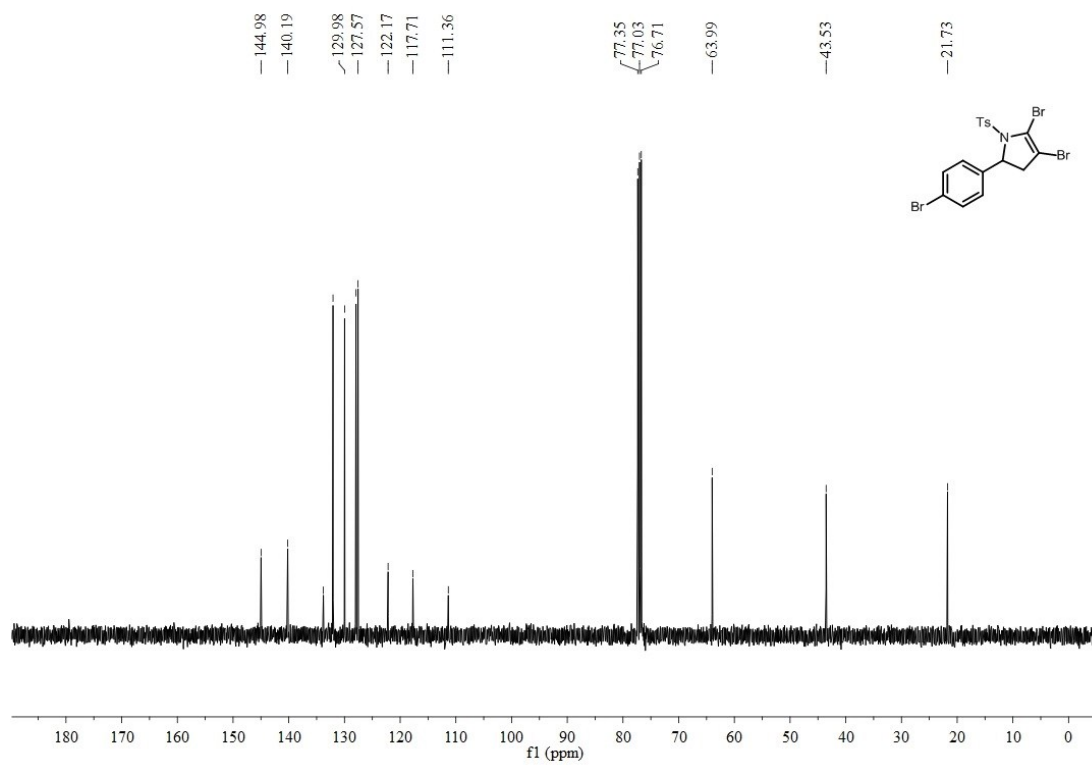

$^1\text{H}$ ,  $^{13}\text{C}$ -NMR spectra of **4g**

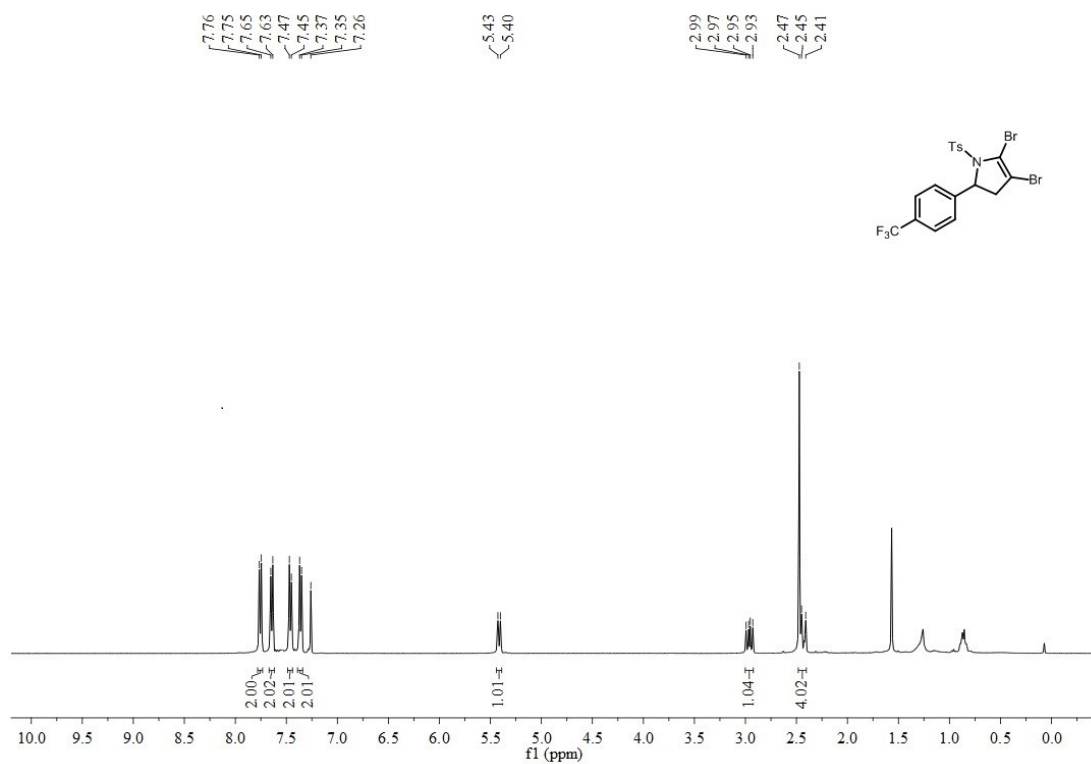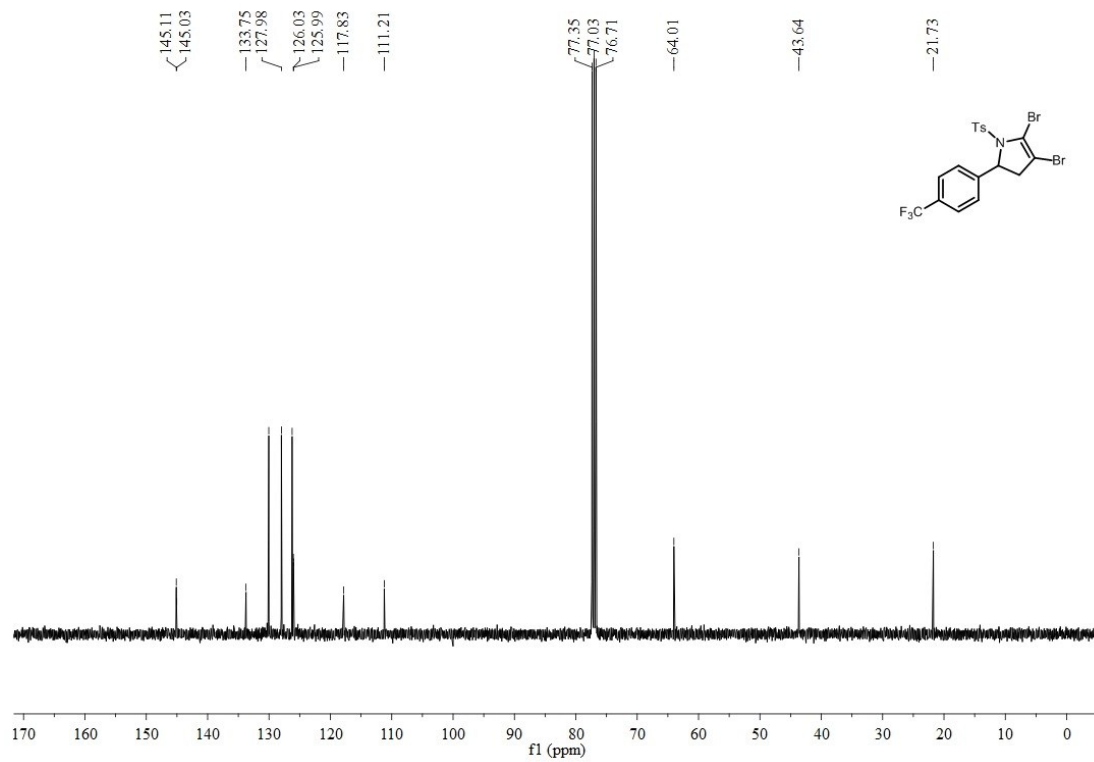

$^1\text{H}$ ,  $^{13}\text{C}$ -NMR spectra of **4h**

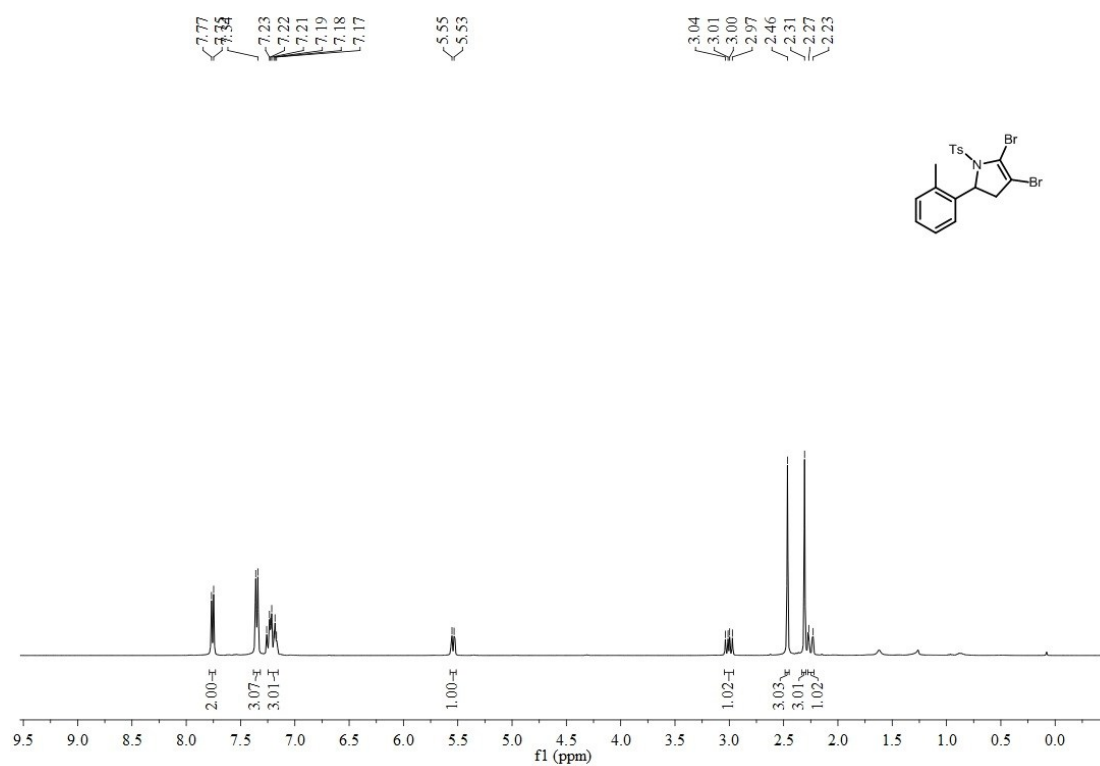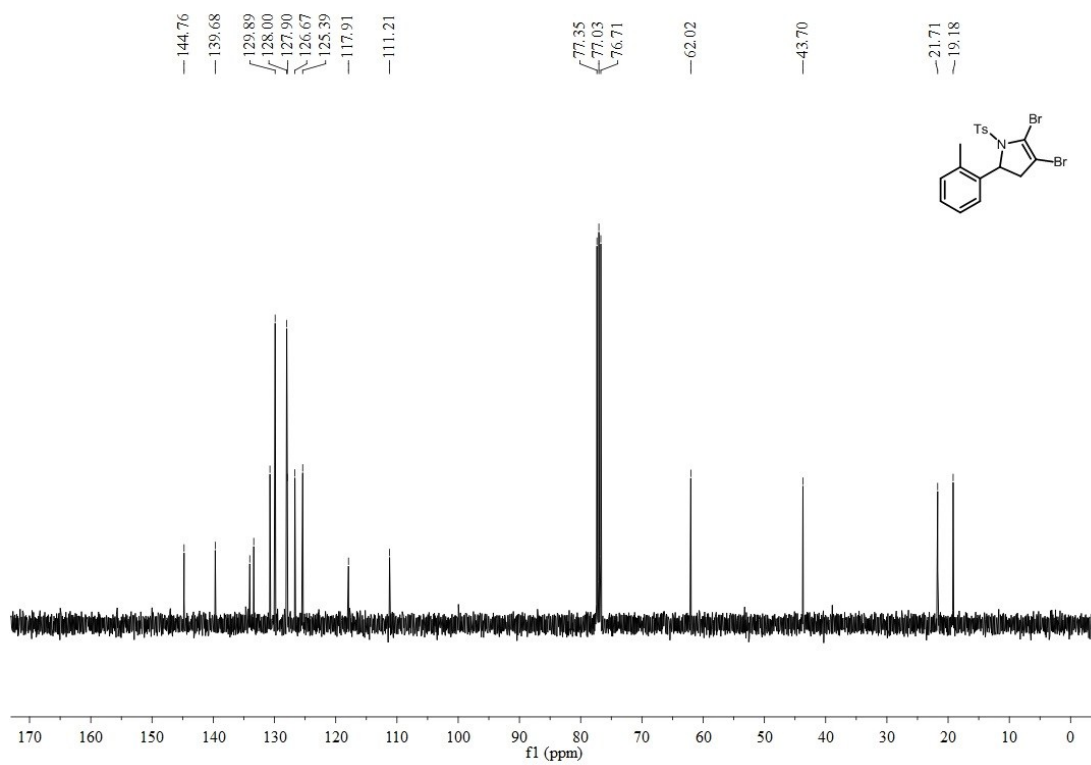

$^1\text{H}$ ,  $^{13}\text{C}$ -NMR spectra of **4i**

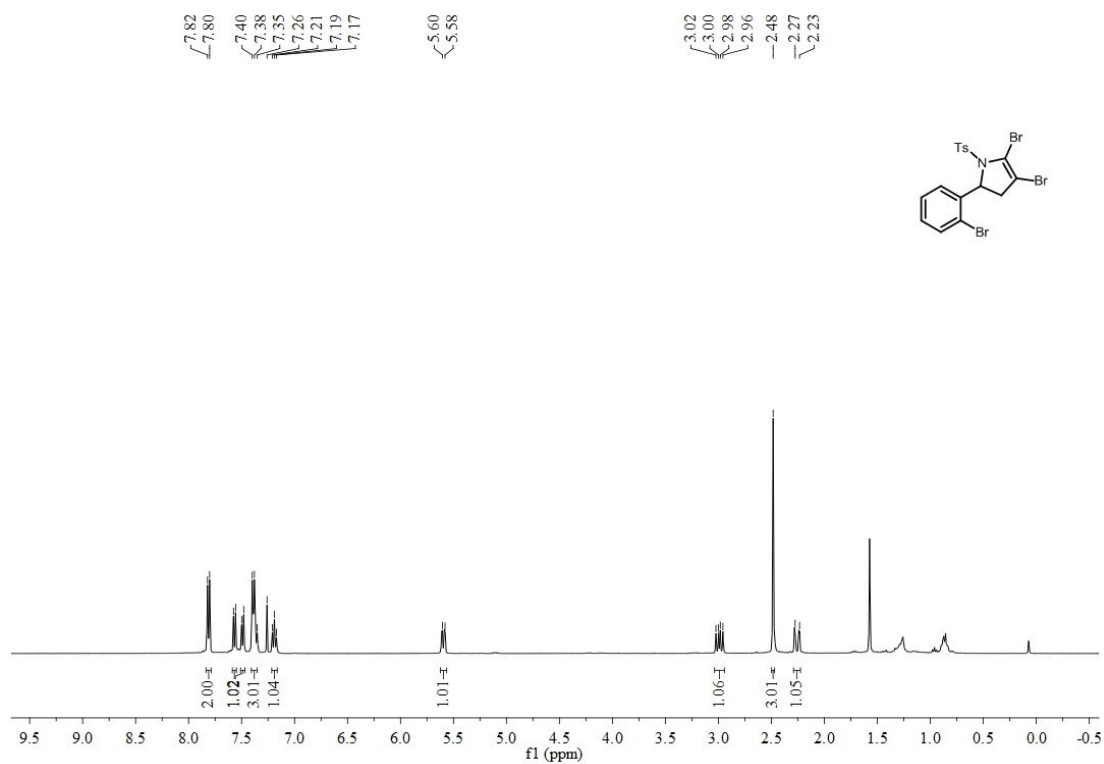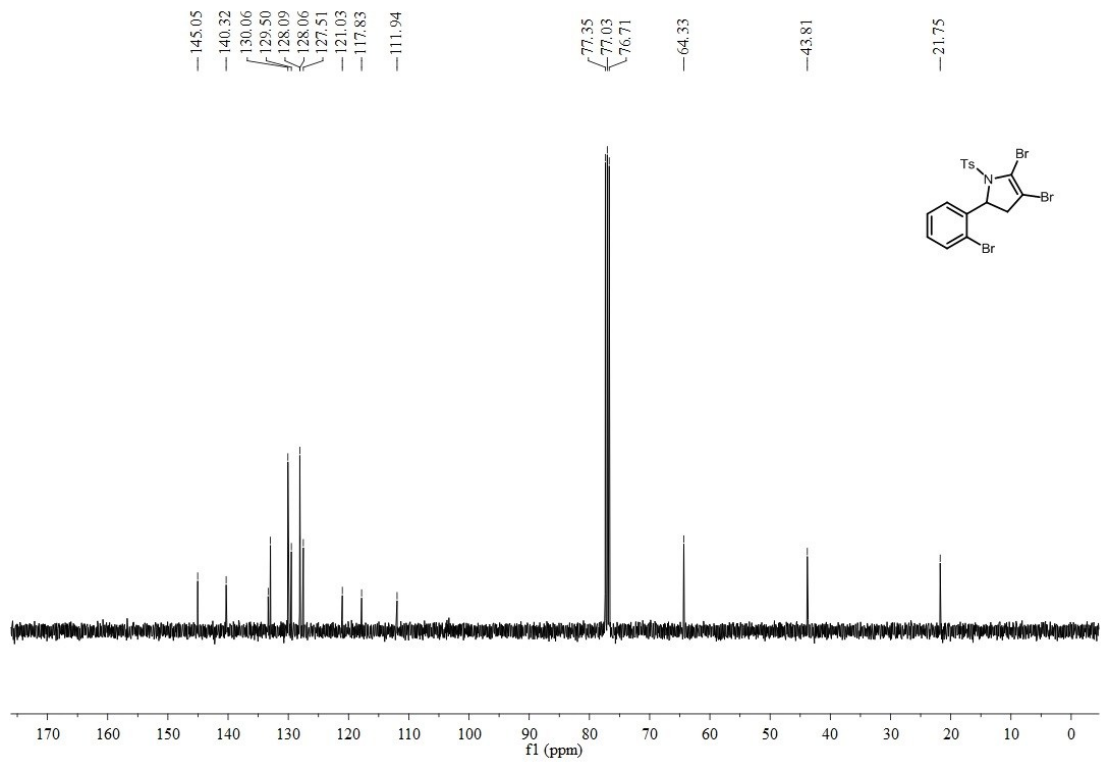

$^1\text{H}$ ,  $^{13}\text{C}$ -NMR spectra of **4j**

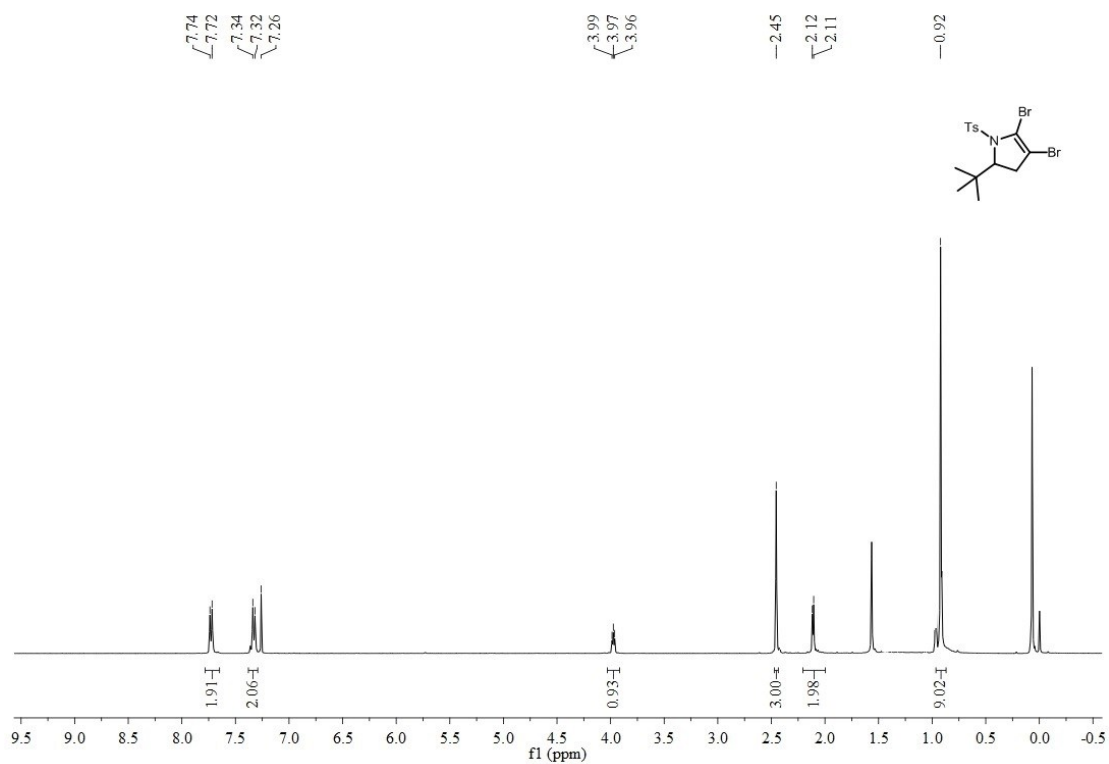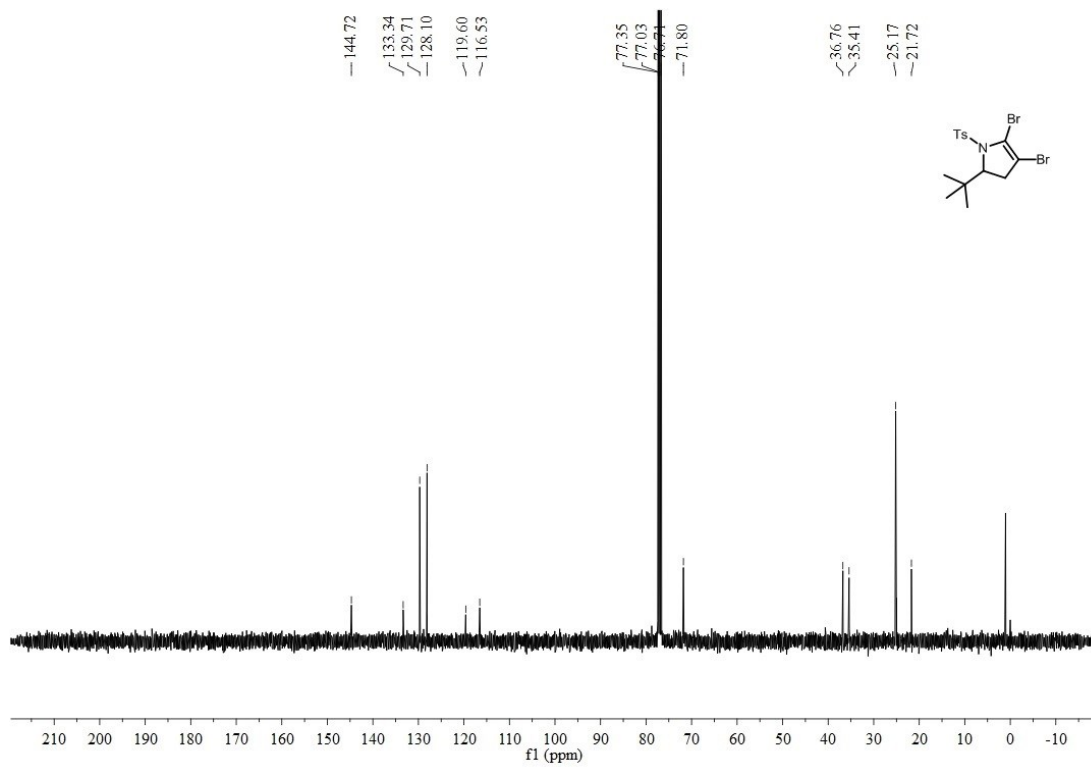



$^1\text{H}$ ,  $^{13}\text{C}$ -NMR spectra of **4k**

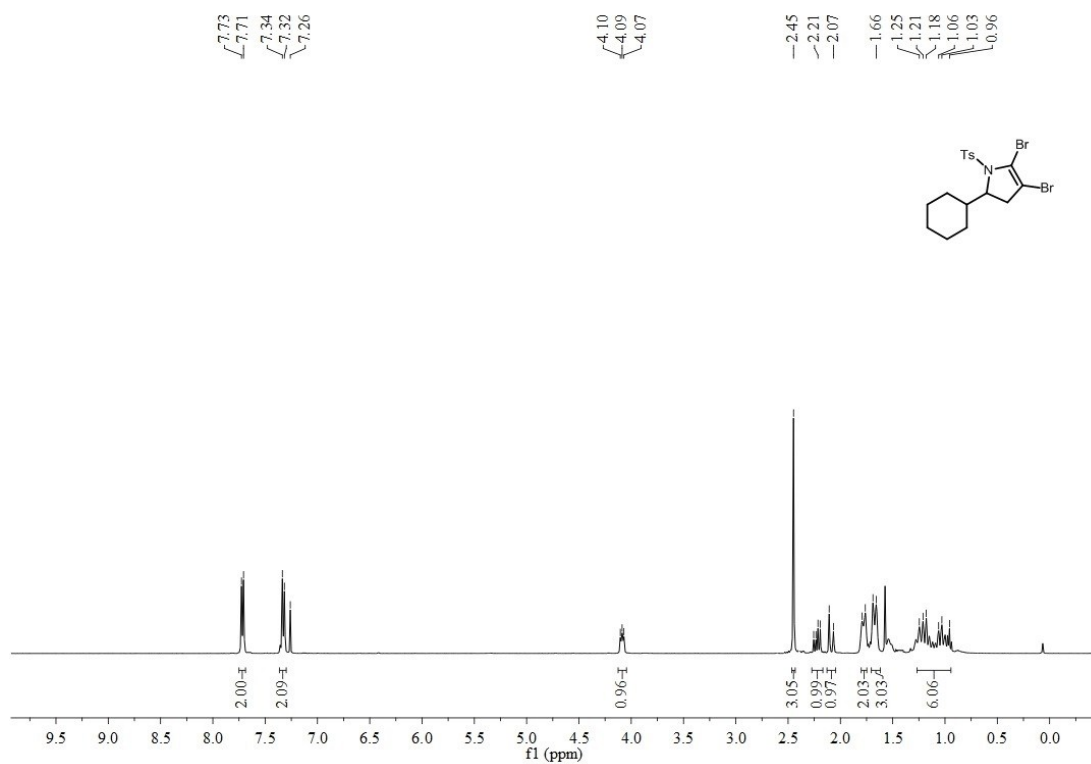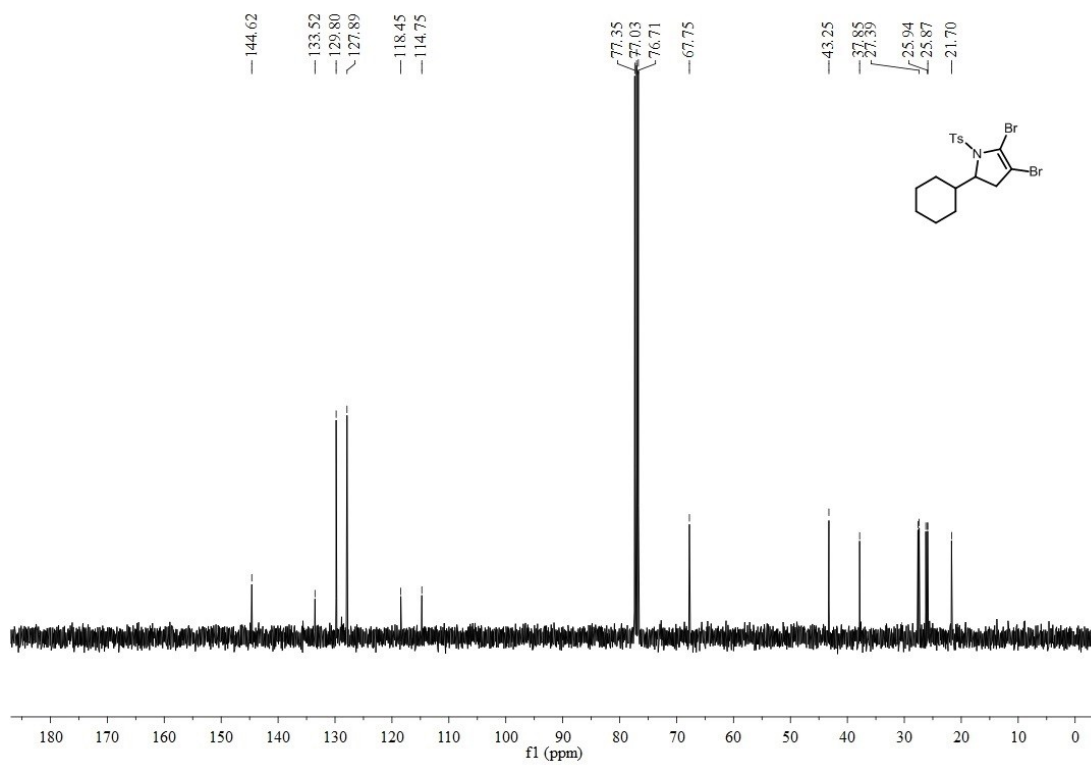

$^1\text{H}$ ,  $^{13}\text{C}$ -NMR spectra of **4l**

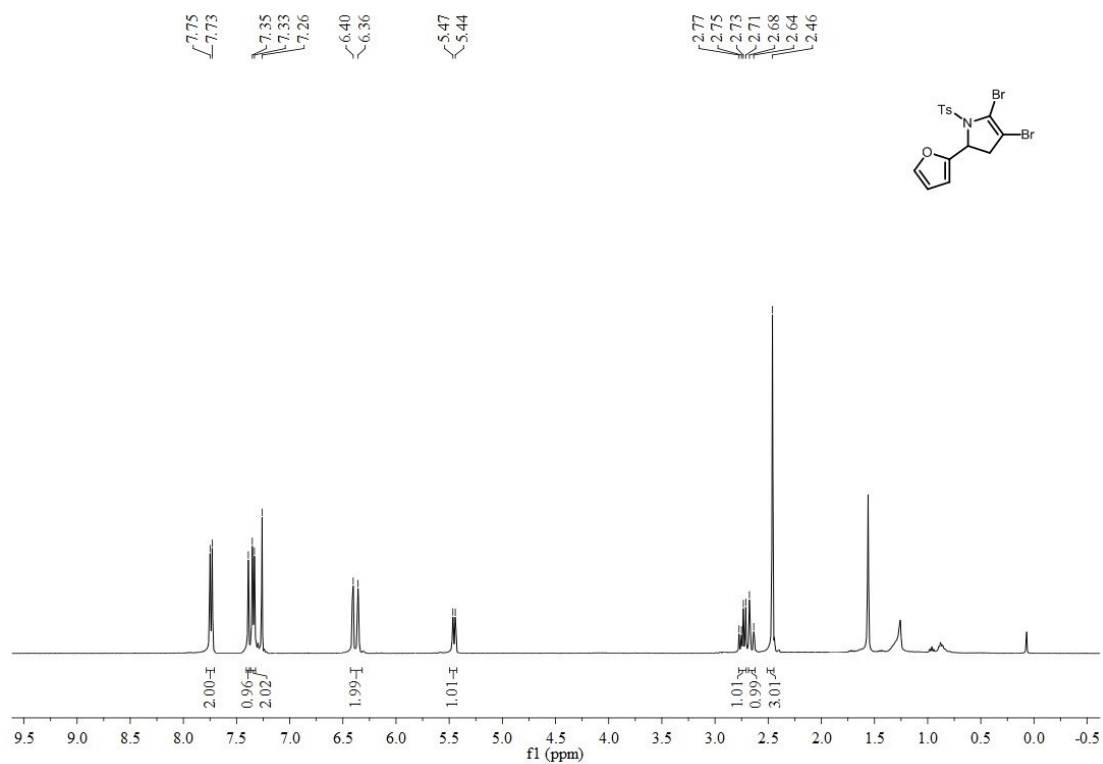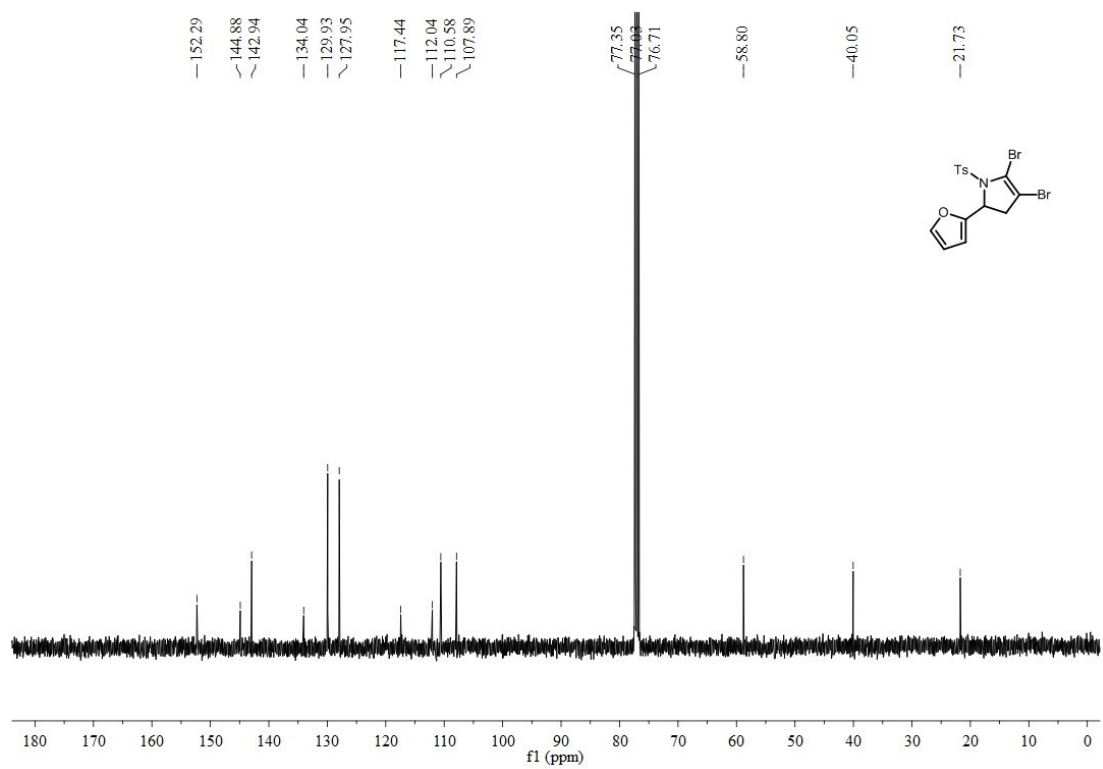

$^1\text{H}$ ,  $^{13}\text{C}$ -NMR spectra of **4m**

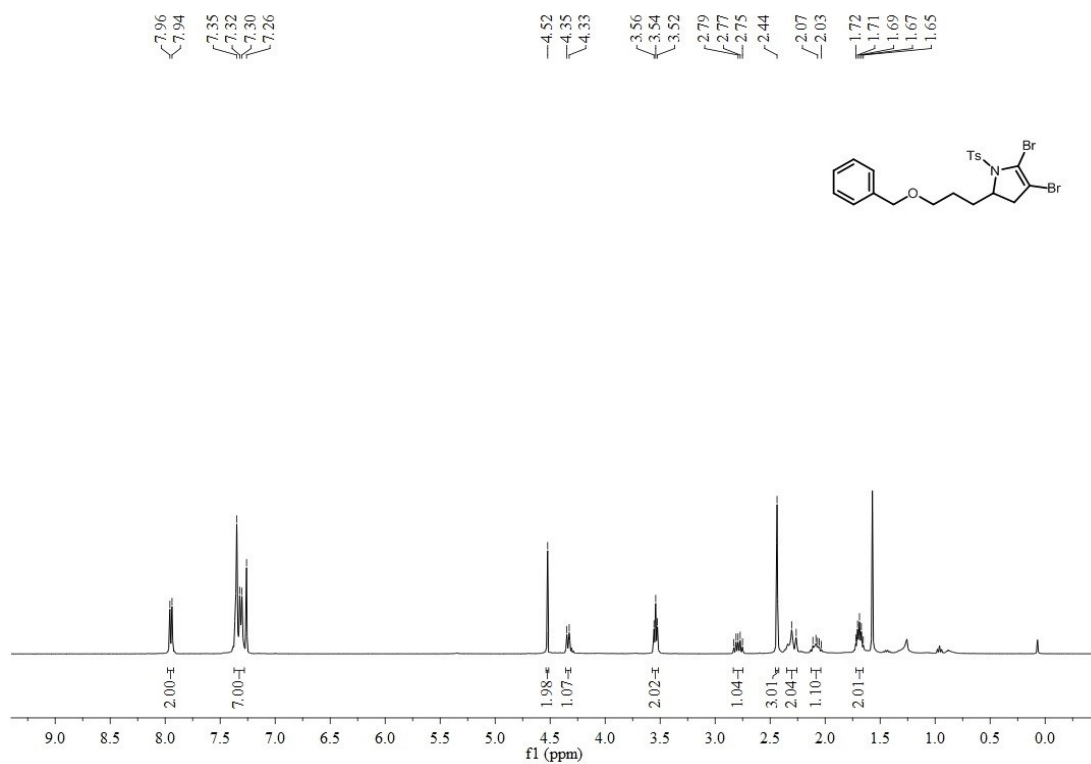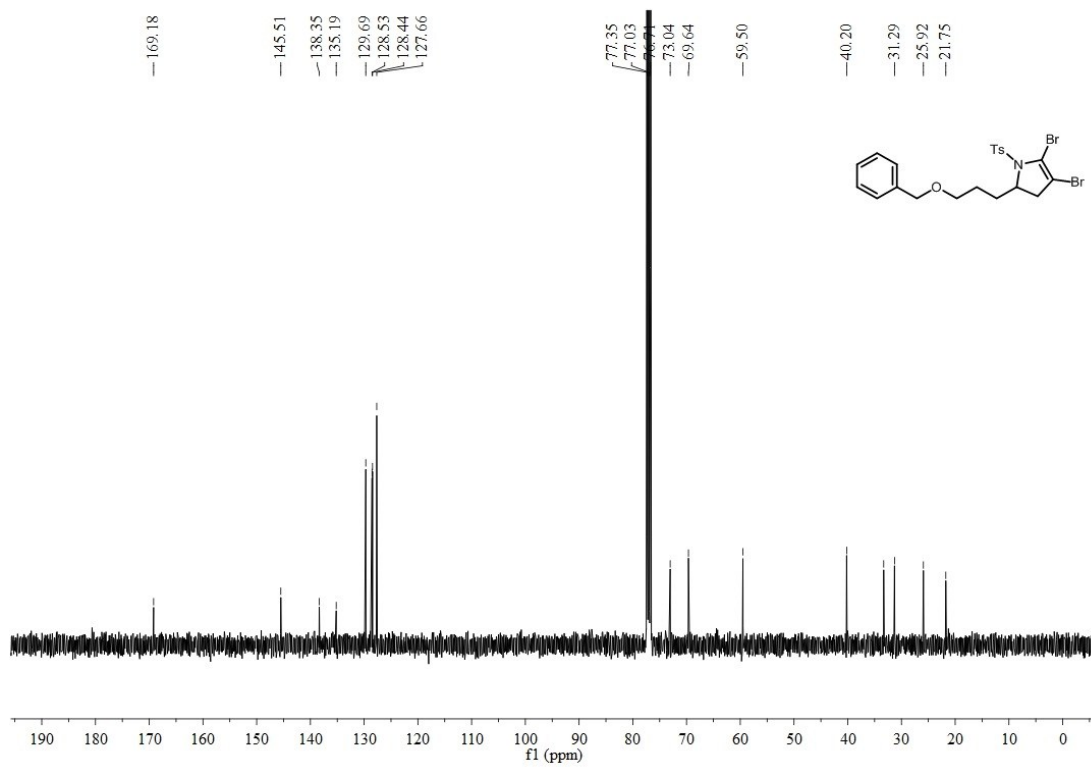

$^1\text{H}$ ,  $^{13}\text{C}$ -NMR spectra of **4o**

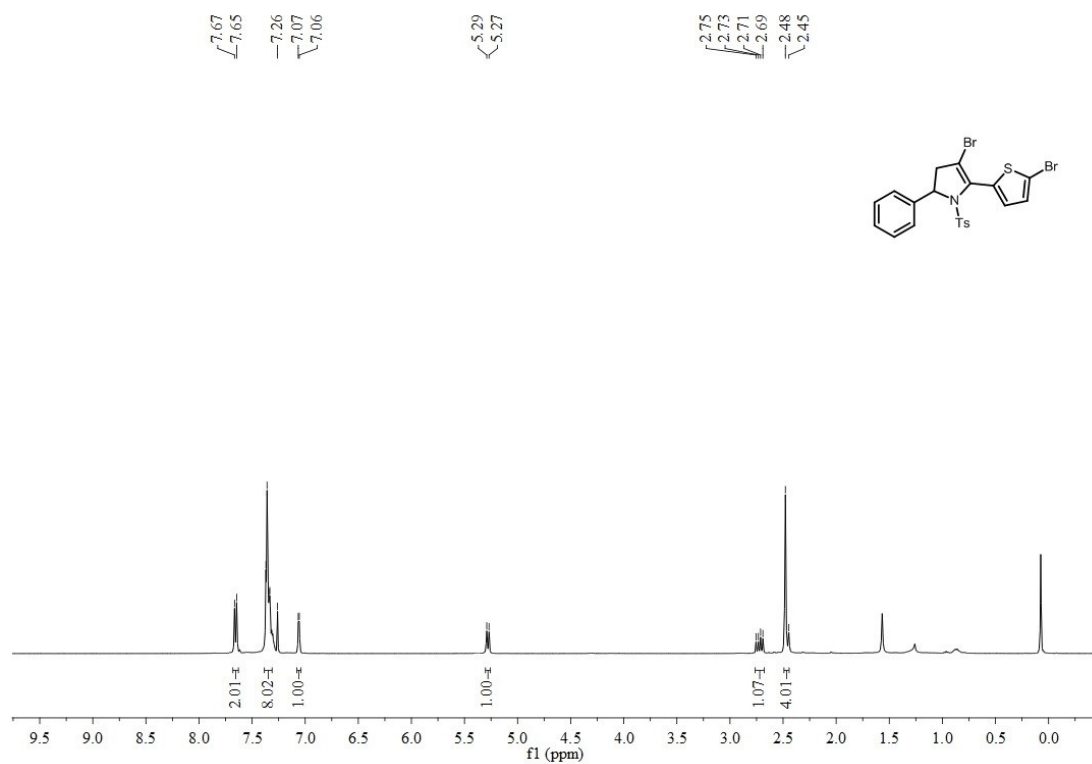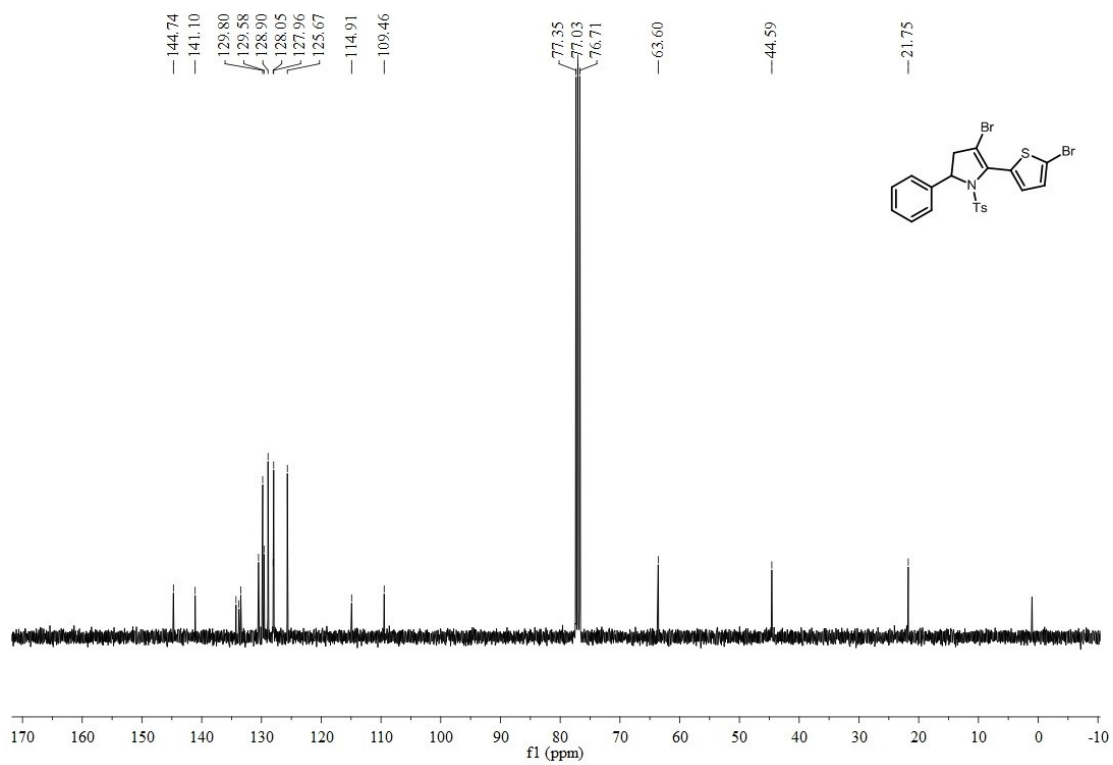

## 5. Crystallographic spectrum for 2j

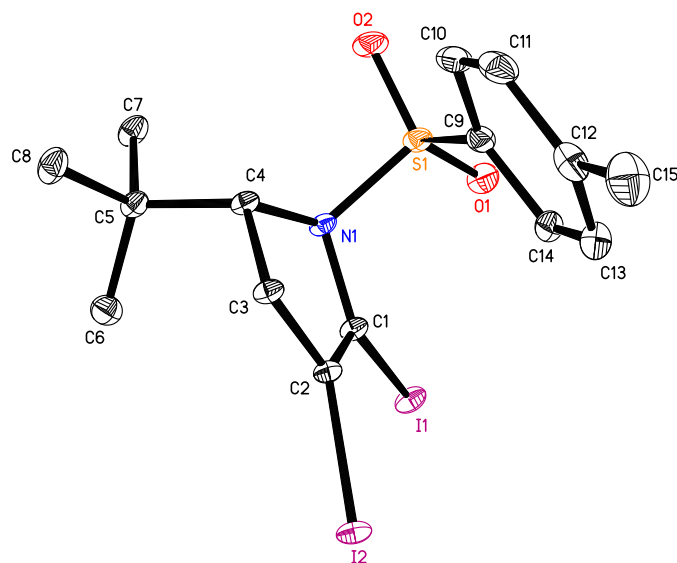

Table 1. Crystal data and structure refinement for **2j**

|                                 |                                                                   |                    |
|---------------------------------|-------------------------------------------------------------------|--------------------|
| Identification code             | 2                                                                 |                    |
| Empirical formula               | C <sub>15</sub> H <sub>19</sub> I <sub>2</sub> N O <sub>2</sub> S |                    |
| Formula weight                  | 531.17                                                            |                    |
| Temperature                     | 130 K                                                             |                    |
| Wavelength                      | 0.71073 Å                                                         |                    |
| Crystal system                  | Monoclinic                                                        |                    |
| Space group                     | P 1 2 <sub>1</sub> /c 1                                           |                    |
| Unit cell dimensions            | a = 9.5678(5) Å                                                   | α = 90°.           |
|                                 | b = 12.3013(7) Å                                                  | β = 101.7100(10)°. |
|                                 | c = 15.5374(9) Å                                                  | γ = 90°.           |
| Volume                          | 1790.64(17) Å <sup>3</sup>                                        |                    |
| Z                               | 4                                                                 |                    |
| Density (calculated)            | 1.970 Mg/m <sup>3</sup>                                           |                    |
| Absorption coefficient          | 3.632 mm <sup>-1</sup>                                            |                    |
| F(000)                          | 1016                                                              |                    |
| Crystal size                    | 0.25 x 0.2 x 0.18 mm <sup>3</sup>                                 |                    |
| Theta range for data collection | 2.129 to 30.568°.                                                 |                    |
| Index ranges                    | -12 ≤ h ≤ 13, -11 ≤ k ≤ 17, -21 ≤ l ≤ 22                          |                    |
| Reflections collected           | 17910                                                             |                    |
| Independent reflections         | 5504 [R(int) = 0.0199]                                            |                    |
| Completeness to theta = 25.242° | 100.0 %                                                           |                    |

|                                   |                                             |
|-----------------------------------|---------------------------------------------|
| Absorption correction             | Semi-empirical from equivalents             |
| Max. and min. transmission        | 0.7461 and 0.6718                           |
| Refinement method                 | Full-matrix least-squares on F <sup>2</sup> |
| Data / restraints / parameters    | 5504 / 0 / 194                              |
| Goodness-of-fit on F <sup>2</sup> | 1.098                                       |
| Final R indices [I>2sigma(I)]     | R1 = 0.0214, wR2 = 0.0511                   |
| R indices (all data)              | R1 = 0.0257, wR2 = 0.0527                   |
| Extinction coefficient            | n/a                                         |
| Largest diff. peak and hole       | 0.492 and -1.116 e.Å <sup>-3</sup>          |

Table 2. Atomic coordinates ( $\times 10^4$ ) and equivalent isotropic displacement parameters ( $\text{\AA}^2 \times 10^3$ )

for mo\_dm15079\_0m.  $U(\text{eq})$  is defined as one third of the trace of the orthogonalized  $U^{ij}$  tensor.

|       | x        | y       | z       | $U(\text{eq})$ |
|-------|----------|---------|---------|----------------|
| I(1)  | 6812(1)  | 998(1)  | 2336(1) | 24(1)          |
| I(2)  | 3879(1)  | 3108(1) | 2326(1) | 22(1)          |
| S(1)  | 9640(1)  | 3196(1) | 2896(1) | 22(1)          |
| O(1)  | 9793(2)  | 2131(1) | 3268(1) | 30(1)          |
| O(2)  | 10800(2) | 3678(1) | 2580(1) | 31(1)          |
| N(1)  | 8265(2)  | 3146(1) | 2030(1) | 18(1)          |
| C(1)  | 6978(2)  | 2668(2) | 2202(1) | 19(1)          |
| C(2)  | 5939(2)  | 3399(2) | 2159(1) | 18(1)          |
| C(3)  | 6424(2)  | 4506(2) | 1940(1) | 18(1)          |
| C(4)  | 7834(2)  | 4257(2) | 1638(1) | 18(1)          |
| C(5)  | 7727(2)  | 4242(2) | 635(2)  | 21(1)          |
| C(6)  | 6518(2)  | 3507(2) | 170(2)  | 29(1)          |
| C(7)  | 9141(2)  | 3839(2) | 435(2)  | 27(1)          |
| C(8)  | 7486(3)  | 5417(2) | 313(2)  | 30(1)          |
| C(9)  | 9065(2)  | 4104(2) | 3626(2) | 23(1)          |
| C(10) | 9435(2)  | 5199(2) | 3633(2) | 29(1)          |
| C(11) | 8792(3)  | 5918(2) | 4112(2) | 31(1)          |
| C(12) | 7780(3)  | 5582(2) | 4581(2) | 31(1)          |
| C(13) | 7446(3)  | 4478(2) | 4581(2) | 30(1)          |
| C(14) | 8077(2)  | 3734(2) | 4106(2) | 25(1)          |
| C(15) | 7058(3)  | 6379(2) | 5084(2) | 43(1)          |

Table 3. Bond lengths [ $\text{\AA}$ ] and angles [ $^\circ$ ] for mo\_dm15079\_0m.

---

|             |            |
|-------------|------------|
| I(1)-C(1)   | 2.074(2)   |
| I(2)-C(2)   | 2.0710(19) |
| S(1)-O(1)   | 1.4276(16) |
| S(1)-O(2)   | 1.4311(16) |
| S(1)-N(1)   | 1.6811(19) |
| S(1)-C(9)   | 1.757(2)   |
| N(1)-C(1)   | 1.438(2)   |
| N(1)-C(4)   | 1.519(2)   |
| C(1)-C(2)   | 1.331(3)   |
| C(2)-C(3)   | 1.500(3)   |
| C(3)-H(3A)  | 0.9900     |
| C(3)-H(3B)  | 0.9900     |
| C(3)-C(4)   | 1.546(3)   |
| C(4)-H(4)   | 1.0000     |
| C(4)-C(5)   | 1.540(3)   |
| C(5)-C(6)   | 1.530(3)   |
| C(5)-C(7)   | 1.531(3)   |
| C(5)-C(8)   | 1.532(3)   |
| C(6)-H(6A)  | 0.9800     |
| C(6)-H(6B)  | 0.9800     |
| C(6)-H(6C)  | 0.9800     |
| C(7)-H(7A)  | 0.9800     |
| C(7)-H(7B)  | 0.9800     |
| C(7)-H(7C)  | 0.9800     |
| C(8)-H(8A)  | 0.9800     |
| C(8)-H(8B)  | 0.9800     |
| C(8)-H(8C)  | 0.9800     |
| C(9)-C(10)  | 1.393(3)   |
| C(9)-C(14)  | 1.394(3)   |
| C(10)-H(10) | 0.9500     |
| C(10)-C(11) | 1.379(4)   |
| C(11)-H(11) | 0.9500     |
| C(11)-C(12) | 1.388(4)   |
| C(12)-C(13) | 1.396(3)   |
| C(12)-C(15) | 1.506(4)   |



|                  |            |
|------------------|------------|
| C(13)-H(13)      | 0.9500     |
| C(13)-C(14)      | 1.388(3)   |
| C(14)-H(14)      | 0.9500     |
| C(15)-H(15A)     | 0.9800     |
| C(15)-H(15B)     | 0.9800     |
| C(15)-H(15C)     | 0.9800     |
| O(1)-S(1)-O(2)   | 119.81(10) |
| O(1)-S(1)-N(1)   | 106.86(10) |
| O(1)-S(1)-C(9)   | 109.97(11) |
| O(2)-S(1)-N(1)   | 105.98(10) |
| O(2)-S(1)-C(9)   | 108.93(11) |
| N(1)-S(1)-C(9)   | 104.06(9)  |
| C(1)-N(1)-S(1)   | 115.25(14) |
| C(1)-N(1)-C(4)   | 105.61(15) |
| C(4)-N(1)-S(1)   | 113.18(13) |
| N(1)-C(1)-I(1)   | 120.61(13) |
| C(2)-C(1)-I(1)   | 127.05(15) |
| C(2)-C(1)-N(1)   | 111.91(17) |
| C(1)-C(2)-I(2)   | 126.62(15) |
| C(1)-C(2)-C(3)   | 111.26(17) |
| C(3)-C(2)-I(2)   | 122.10(13) |
| C(2)-C(3)-H(3A)  | 111.2      |
| C(2)-C(3)-H(3B)  | 111.2      |
| C(2)-C(3)-C(4)   | 102.60(15) |
| H(3A)-C(3)-H(3B) | 109.2      |
| C(4)-C(3)-H(3A)  | 111.2      |
| C(4)-C(3)-H(3B)  | 111.2      |
| N(1)-C(4)-C(3)   | 103.83(15) |
| N(1)-C(4)-H(4)   | 109.0      |
| N(1)-C(4)-C(5)   | 110.61(16) |
| C(3)-C(4)-H(4)   | 109.0      |
| C(5)-C(4)-C(3)   | 115.26(17) |
| C(5)-C(4)-H(4)   | 109.0      |
| C(6)-C(5)-C(4)   | 111.91(17) |
| C(6)-C(5)-C(7)   | 109.12(19) |
| C(6)-C(5)-C(8)   | 110.73(19) |
| C(7)-C(5)-C(4)   | 109.27(17) |

|                   |            |
|-------------------|------------|
| C(7)-C(5)-C(8)    | 108.63(18) |
| C(8)-C(5)-C(4)    | 107.10(18) |
| C(5)-C(6)-H(6A)   | 109.5      |
| C(5)-C(6)-H(6B)   | 109.5      |
| C(5)-C(6)-H(6C)   | 109.5      |
| H(6A)-C(6)-H(6B)  | 109.5      |
| H(6A)-C(6)-H(6C)  | 109.5      |
| H(6B)-C(6)-H(6C)  | 109.5      |
| C(5)-C(7)-H(7A)   | 109.5      |
| C(5)-C(7)-H(7B)   | 109.5      |
| C(5)-C(7)-H(7C)   | 109.5      |
| H(7A)-C(7)-H(7B)  | 109.5      |
| H(7A)-C(7)-H(7C)  | 109.5      |
| H(7B)-C(7)-H(7C)  | 109.5      |
| C(5)-C(8)-H(8A)   | 109.5      |
| C(5)-C(8)-H(8B)   | 109.5      |
| C(5)-C(8)-H(8C)   | 109.5      |
| H(8A)-C(8)-H(8B)  | 109.5      |
| H(8A)-C(8)-H(8C)  | 109.5      |
| H(8B)-C(8)-H(8C)  | 109.5      |
| C(10)-C(9)-S(1)   | 120.51(18) |
| C(10)-C(9)-C(14)  | 120.7(2)   |
| C(14)-C(9)-S(1)   | 118.22(17) |
| C(9)-C(10)-H(10)  | 120.5      |
| C(11)-C(10)-C(9)  | 119.0(2)   |
| C(11)-C(10)-H(10) | 120.5      |
| C(10)-C(11)-H(11) | 119.1      |
| C(10)-C(11)-C(12) | 121.9(2)   |
| C(12)-C(11)-H(11) | 119.1      |
| C(11)-C(12)-C(13) | 118.3(2)   |
| C(11)-C(12)-C(15) | 121.4(2)   |
| C(13)-C(12)-C(15) | 120.3(2)   |
| C(12)-C(13)-H(13) | 119.4      |
| C(14)-C(13)-C(12) | 121.2(2)   |
| C(14)-C(13)-H(13) | 119.4      |
| C(9)-C(14)-H(14)  | 120.5      |
| C(13)-C(14)-C(9)  | 119.0(2)   |
| C(13)-C(14)-H(14) | 120.5      |

|                     |       |
|---------------------|-------|
| C(12)-C(15)-H(15A)  | 109.5 |
| C(12)-C(15)-H(15B)  | 109.5 |
| C(12)-C(15)-H(15C)  | 109.5 |
| H(15A)-C(15)-H(15B) | 109.5 |
| H(15A)-C(15)-H(15C) | 109.5 |
| H(15B)-C(15)-H(15C) | 109.5 |

---

Symmetry transformations used to generate equivalent atoms:

Table 4. Anisotropic displacement parameters ( $\text{\AA}^2 \times 10^3$ ) for mo\_dm15079\_0m. The anisotropic displacement factor exponent takes the form:  $-2\pi^2 [ h^2 a^2 U^{11} + \dots + 2 h k a^* b^* U^{12} ]$

|       | U <sup>11</sup> | U <sup>22</sup> | U <sup>33</sup> | U <sup>23</sup> | U <sup>13</sup> | U <sup>12</sup> |
|-------|-----------------|-----------------|-----------------|-----------------|-----------------|-----------------|
| I(1)  | 27(1)           | 14(1)           | 35(1)           | 2(1)            | 15(1)           | 0(1)            |
| I(2)  | 15(1)           | 21(1)           | 33(1)           | -3(1)           | 11(1)           | -2(1)           |
| S(1)  | 14(1)           | 24(1)           | 30(1)           | 7(1)            | 5(1)            | 3(1)            |
| O(1)  | 25(1)           | 25(1)           | 39(1)           | 12(1)           | 6(1)            | 7(1)            |
| O(2)  | 14(1)           | 36(1)           | 44(1)           | 7(1)            | 9(1)            | 1(1)            |
| N(1)  | 14(1)           | 17(1)           | 26(1)           | 5(1)            | 8(1)            | 1(1)            |
| C(1)  | 19(1)           | 15(1)           | 25(1)           | 1(1)            | 9(1)            | -1(1)           |
| C(2)  | 15(1)           | 19(1)           | 22(1)           | -1(1)           | 7(1)            | -1(1)           |
| C(3)  | 16(1)           | 14(1)           | 26(1)           | 1(1)            | 8(1)            | 1(1)            |
| C(4)  | 15(1)           | 14(1)           | 26(1)           | 3(1)            | 7(1)            | 2(1)            |
| C(5)  | 19(1)           | 20(1)           | 26(1)           | 4(1)            | 9(1)            | 4(1)            |
| C(6)  | 26(1)           | 34(1)           | 27(1)           | -4(1)           | 7(1)            | 0(1)            |
| C(7)  | 25(1)           | 28(1)           | 32(1)           | 6(1)            | 15(1)           | 6(1)            |
| C(8)  | 30(1)           | 30(1)           | 34(1)           | 12(1)           | 12(1)           | 8(1)            |
| C(9)  | 18(1)           | 24(1)           | 25(1)           | 4(1)            | 0(1)            | 0(1)            |
| C(10) | 20(1)           | 28(1)           | 35(1)           | 4(1)            | -1(1)           | -6(1)           |
| C(11) | 31(1)           | 22(1)           | 37(1)           | -2(1)           | -4(1)           | -6(1)           |
| C(12) | 33(1)           | 30(1)           | 25(1)           | -3(1)           | -3(1)           | 1(1)            |
| C(13) | 34(1)           | 31(1)           | 24(1)           | 2(1)            | 6(1)            | 1(1)            |
| C(14) | 28(1)           | 25(1)           | 22(1)           | 4(1)            | 4(1)            | -2(1)           |
| C(15) | 56(2)           | 36(1)           | 35(1)           | -7(1)           | 8(1)            | 5(1)            |

Table 5. Hydrogen coordinates ( $\times 10^4$ ) and isotropic displacement parameters ( $\text{\AA}^2 \times 10^{-3}$ ) for mo\_dm15079\_0m.

|        | x     | y    | z    | U(eq) |
|--------|-------|------|------|-------|
| H(3A)  | 6589  | 4988 | 2461 | 22    |
| H(3B)  | 5718  | 4850 | 1463 | 22    |
| H(4)   | 8570  | 4802 | 1905 | 21    |
| H(6A)  | 6442  | 3558 | -467 | 43    |
| H(6B)  | 5617  | 3739 | 320  | 43    |
| H(6C)  | 6719  | 2754 | 359  | 43    |
| H(7A)  | 9926  | 4287 | 752  | 41    |
| H(7B)  | 9108  | 3892 | -198 | 41    |
| H(7C)  | 9294  | 3080 | 622  | 41    |
| H(8A)  | 8289  | 5869 | 602  | 46    |
| H(8B)  | 6600  | 5694 | 455  | 46    |
| H(8C)  | 7417  | 5441 | -325 | 46    |
| H(10)  | 10120 | 5447 | 3312 | 34    |
| H(11)  | 9049  | 6665 | 4121 | 38    |
| H(13)  | 6775  | 4231 | 4912 | 36    |
| H(14)  | 7838  | 2985 | 4107 | 30    |
| H(15A) | 6200  | 6668 | 4698 | 64    |
| H(15B) | 7714  | 6978 | 5296 | 64    |
| H(15C) | 6791  | 6010 | 5586 | 64    |

Table 6. Torsion angles [°] for mo\_dm15079\_0m.

---

|                       |             |
|-----------------------|-------------|
| I(1)-C(1)-C(2)-I(2)   | 6.0(3)      |
| I(1)-C(1)-C(2)-C(3)   | -172.18(15) |
| I(2)-C(2)-C(3)-C(4)   | -165.15(14) |
| S(1)-N(1)-C(1)-I(1)   | -75.26(18)  |
| S(1)-N(1)-C(1)-C(2)   | 111.76(18)  |
| S(1)-N(1)-C(4)-C(3)   | -105.92(15) |
| S(1)-N(1)-C(4)-C(5)   | 129.88(15)  |
| S(1)-C(9)-C(10)-C(11) | 170.09(18)  |
| S(1)-C(9)-C(14)-C(13) | -170.22(17) |
| O(1)-S(1)-N(1)-C(1)   | 50.27(16)   |
| O(1)-S(1)-N(1)-C(4)   | 171.98(13)  |
| O(1)-S(1)-C(9)-C(10)  | 150.77(17)  |
| O(1)-S(1)-C(9)-C(14)  | -38.0(2)    |
| O(2)-S(1)-N(1)-C(1)   | 179.11(14)  |
| O(2)-S(1)-N(1)-C(4)   | -59.18(16)  |
| O(2)-S(1)-C(9)-C(10)  | 17.6(2)     |
| O(2)-S(1)-C(9)-C(14)  | -171.13(17) |
| N(1)-S(1)-C(9)-C(10)  | -95.08(18)  |
| N(1)-S(1)-C(9)-C(14)  | 76.17(18)   |
| N(1)-C(1)-C(2)-I(2)   | 178.44(14)  |
| N(1)-C(1)-C(2)-C(3)   | 0.2(3)      |
| N(1)-C(4)-C(5)-C(6)   | 65.8(2)     |
| N(1)-C(4)-C(5)-C(7)   | -55.1(2)    |
| N(1)-C(4)-C(5)-C(8)   | -172.62(16) |
| C(1)-N(1)-C(4)-C(3)   | 21.1(2)     |
| C(1)-N(1)-C(4)-C(5)   | -103.15(18) |
| C(1)-C(2)-C(3)-C(4)   | 13.1(2)     |
| C(2)-C(3)-C(4)-N(1)   | -20.3(2)    |
| C(2)-C(3)-C(4)-C(5)   | 100.85(19)  |
| C(3)-C(4)-C(5)-C(6)   | -51.5(2)    |
| C(3)-C(4)-C(5)-C(7)   | -172.51(17) |
| C(3)-C(4)-C(5)-C(8)   | 70.0(2)     |
| C(4)-N(1)-C(1)-I(1)   | 159.03(14)  |
| C(4)-N(1)-C(1)-C(2)   | -13.9(2)    |
| C(9)-S(1)-N(1)-C(1)   | -66.08(16)  |
| C(9)-S(1)-N(1)-C(4)   | 55.63(15)   |

|                         |           |
|-------------------------|-----------|
| C(9)-C(10)-C(11)-C(12)  | -0.5(3)   |
| C(10)-C(9)-C(14)-C(13)  | 1.0(3)    |
| C(10)-C(11)-C(12)-C(13) | 1.8(4)    |
| C(10)-C(11)-C(12)-C(15) | -178.5(2) |
| C(11)-C(12)-C(13)-C(14) | -1.7(4)   |
| C(12)-C(13)-C(14)-C(9)  | 0.4(3)    |
| C(14)-C(9)-C(10)-C(11)  | -0.9(3)   |
| C(15)-C(12)-C(13)-C(14) | 178.6(2)  |

---

Symmetry transformations used to generate equivalent atoms:
